# Supplementary material for: A conjugated Schiff-base macrocycle weakens the transverse crystal field of air-stable dysprosium single-molecule magnets
Source: Royal Society of Chemistry journal article supplement (doi:10.1039/d2qi01565j), 2022-01-01
Supplement: d2qi01565j1.pdf [file d2qi01565j1.pdf]

## Supporting Information for

### Conjugated Schiff-base macrocycle weakens the transverse crystal field of air-stable dysprosium single-molecule magnets

Shuting Liu,<sup>a, b</sup> Yolimar Gil,<sup>d</sup> Chen Zhao,<sup>a, b</sup> Jinjiang Wu,<sup>a, b</sup> Zhenhua Zhu,<sup>a</sup> Xiao-Lei Li,<sup>a</sup> Daniel Aravena,<sup>\*c</sup> and Jinkui Tang<sup>\*a, b</sup>

<sup>a</sup> State Key Laboratory of Rare Earth Resource Utilization, Changchun Institute of Applied Chemistry, Chinese Academy of Sciences, Changchun 130022, P. R. China.

<sup>b</sup> School of Applied Chemistry and Engineering, University of Science and Technology of China, Hefei 230026, P. R. China.

<sup>c</sup> Departamento de Química de los Materiales, Facultad de Química y Biología, Universidad de Santiago de Chile, Casilla 40, Correo 33, Santiago, Chile.

<sup>d</sup> Facultad de Ciencias Químicas y Farmacéuticas, Universidad de Chile, Casilla 233, Santiago, Chile.

#### Table of contents

|                                                 |           |
|-------------------------------------------------|-----------|
| <b>I. General procedures .....</b>              | <b>2</b>  |
| <b>II. Synthesis and characterization .....</b> | <b>3</b>  |
| <b>III. X-ray crystallography .....</b>         | <b>8</b>  |
| <b>IV. Magnetic characterization .....</b>      | <b>26</b> |
| <b>V. Computational details .....</b>           | <b>50</b> |
| <b>VI. References.....</b>                      | <b>56</b> |

## I. General procedures

Unless stated otherwise, all solvents and chemicals were used as received. Coordination reactions were carried out under aerobic conditions. **Elemental analyses** (C, H, and N) were performed by PerkinElmer 2400 analyzer. **Fourier Transform infrared spectrum** (FT-IR) was recorded on a Nicolet 6700 Flex FTIR spectrometer equipped with a smart iTR attenuated total reflectance (ATR) sampling accessory and labeled according to their relative intensities with vs (very strong), s (strong), m (medium), and w (weak). **Circular dichroism** (CD) spectra data were collected on a Jasco J-820 spectropolarimeter at room temperature. **Powder X-ray diffraction** (PXRD) data were collected on a Bruker D8 advance X-ray diffractometer using Cu K $\alpha$  radiation ( $\lambda = 1.54184 \text{ \AA}$ ) over the range of 5-50°. **Thermogravimetric analyses** (TGA) were performed on a Netzsch STA 449F3 analyzer under N<sub>2</sub> atmosphere from room temperature to 800 °C at a heating rate of 10 °C/min. **Single-crystal X-ray diffraction** (SCXRD) measurements were collected on a Bruker D8 Venture CCD diffractometer with graphite-monochromated Mo K $\alpha$  radiation ( $\lambda = 0.71073 \text{ \AA}$ ). The crystal was collected at 180 K. The program APEX3 was used to integrate the data, which were thereafter corrected for absorption using multi-scan method. The structures were solved by intrinsic phasing methods and refined by full-matrix least-squares methods on F<sup>2</sup> with anisotropic thermal parameters for all non-hydrogen atoms by using the SHELXT<sup>1</sup> (intrinsic phasing methods) and refined by SHELXL<sup>2</sup> (full matrix least-squares techniques) in the Olex2<sup>3</sup> package. All non-hydrogen atoms were refined with anisotropic displacement parameters. The hydrogen atoms were introduced in calculated positions and refined with a fixed geometry with respect to their carrier atoms. Crystallographic data, refinement details and CCDC number are given in Table S1-S3. **Magnetic susceptibility measurements** were performed using a Quantum Design MPMS-XL7 SQUID magnetometer. Variable-temperature direct current (dc) magnetic susceptibility were collected with an external magnetic field of 1000 Oe in the temperature range of 2-300 K and variable field magnetization data from  $\pm 7$  T were collected. Alternating current (ac) magnetic susceptibility data were collected in zero applied field using a 3.0 Oe ac oscillating field. The experimental magnetic data were corrected for the diamagnetism estimated from Pascal's constants<sup>4</sup> and sample holder calibration.

## II. Synthesis and characterization

8-aminoquinoline-2-carbaldehyde was prepared via a previously published method.<sup>5, 6</sup> Potassium (3-bromophenyl)triphenylborate and potassium (4-bromophenyl)triphenylborates were synthesized according literature procedures.<sup>7</sup>

Synthetic strategy for **1**: 8-aminoquinoline-2-carbaldehyde (0.0517 g, 0.3 mmol) was added to acetonitrile (15 mL) together with Dy(ClO<sub>4</sub>)<sub>3</sub>·6H<sub>2</sub>O (0.0569 g, 0.1 mmol). The reaction was kept at 80 °C for 24 h. Centrifugation was used to remove the precipitate from the solution. Ph<sub>3</sub>SiOH (0.0553 g, 0.2 mmol) and Et<sub>3</sub>N (28 μL, 0.2 mmol) were added to supernatant. The reaction was kept at 80 °C for another 12 h. After cooling to room temperature, the mixture was filtered to give a clear dark orange solution. Orange block crystals suitable for single crystal diffraction were obtained after slow evaporation of solvent for one week (yield: 21 mg, 16%, based on dysprosium). Elemental analysis calculated for C<sub>66</sub>H<sub>50</sub>ClDyN<sub>6</sub>O<sub>7</sub>Si<sub>2</sub> (%): C, 61.30; H, 3.90; N, 6.50. Found (%): C, 61.63; H, 3.58; N, 6.56. Selected IR (cm<sup>-1</sup>): 621 (s), 700 (vs), 741 (m), 799 (w), 842 (w), 853 (w), 944 (s), 1088 (s), 1142 (w), 1223 (m), 1270 (w), 1315 (w), 1375 (w), 1426 (m), 1470 (w), 1511 (m), 1557 (w), 1588 (w), 1609 (w), 1971 (w), 3024 (br).

Synthetic strategy for **2**: Using the procedure described above for **1**, Dy(OTf)<sub>3</sub>·9H<sub>2</sub>O (0.0772 g, 0.1 mmol) was used to give **2** as orange block crystals (yield: 26 mg, 19%, based on dysprosium). Elemental analysis calculated for C<sub>67</sub>H<sub>48</sub>DyF<sub>3</sub>N<sub>6</sub>O<sub>5</sub>SSi<sub>2</sub> (%): C, 60.74; H, 3.65; N, 6.34. Found (%): C, 60.39; H, 3.41; N, 6.31. Selected IR (cm<sup>-1</sup>): 571 (w), 634 (s), 699 (vs), 741 (m), 765 (w), 798 (w), 850 (m), 889 (w), 942 (s), 997 (w), 1028 (s), 1105 (m), 1147 (m), 1222 (m), 1255 (s), 1319 (m), 1377 (w), 1426 (m), 1470 (w), 1512 (m), 1558 (w), 1587 (w), 1608 (w), 1959 (w), 3064 (br).

Synthetic strategy for **3R**: (1R,2R)-cyclohexane-1,2-diamine (0.0228 g, 0.2 mmol) and pyridine-2,6-dicarbaldehyde (0.0270 g, 0.2 mmol) were dissolved to methanol (20 mL), followed by addition of DyCl<sub>3</sub>·6H<sub>2</sub>O (0.0377 g, 0.1 mmol). The mixture was refluxed for 12 h and methanol was evaporated under reduced pressure, yielding an orange powder. The orange solid was dissolved in a mixture solvent of 20 mL DCM and 20 mL H<sub>2</sub>O. Ph<sub>3</sub>SiOH (0.0553 g, 0.2 mmol), Et<sub>3</sub>N (28 μL, 0.2 mmol) and potassium (3-bromophenyl)triphenylborates (0.0437 g, 0.1 mmol) were added to the above mentioned mixture in turn. The mixture was heated at 70 °C for 1 h, then cooling to room temperature. The DCM phase was separated and filtered, giving a yellow clear solution. The light-yellow block crystals suitable for X-ray diffraction were obtained by layering the DCM phase with n-pentane at room temperature for 4 days (yield: 50 mg, 29%, based on dysprosium). Elemental analysis calculated for C<sub>86</sub>H<sub>81</sub>BBrDyN<sub>6</sub>O<sub>3</sub>Si<sub>2</sub> (%): C, 66.38; H, 5.25; N 5.40. Found (%): C, 66.46; H, 4.79; N 5.45. Selected IR (cm<sup>-1</sup>): 561(m), 574(m), 611(s), 655(s), 697(vs), 737(s), 773(w), 857(m), 957(vs), 1000(m), 1008(m), 1030(m), 1045(m), 1103(s), 1163(m), 1273(m), 1384(w), 1426(s), 1448(w), 1462(m), 1592(m), 1650(w), 2857(w), 2932(w), 3057(w).

Synthetic strategy for **3S**: Using the procedure described above for **3R**, (1S,2S)-cyclohexane-1,2-diamine (0.0228 g, 0.2 mmol) was used to give **3S** as light-yellow crystals (yield: 47 mg, 29%, based on dysprosium) Elemental analysis calculated for C<sub>86</sub>H<sub>81</sub>BBrDyN<sub>6</sub>O<sub>3</sub>Si<sub>2</sub> (%): C, 66.38; H, 5.25; N 5.40. Found (%): C, 66.16; H, 4.78; N 5.43. Selected IR (cm<sup>-1</sup>): 559(w), 579(m), 611(s), 666(m), 700(vs), 736(s), 800(m), 861(m), 969(vs), 1000(m), 1007(m), 1031(m), 1105(s), 1164(w), 1426(s),

1477(m), 1591(s), 1649(m), 2859(w), 2931(w), 3057(w).

Synthetic strategy for **4R**: Using the procedure described above for **3R**, potassium (4-bromophenyl)triphenylborates (0.0437 g, 0.1 mmol) was used to give **4R** as light-yellow crystals (yield: 50 mg, 29%, based on dysprosium). Elemental analysis calculated for  $C_{86}H_{81}BBrDyN_6O_3Si_2$  (%): C, 66.38; H, 5.25; N 5.40. Found (%): C, 65.81; H, 4.76; N 5.32. Selected IR ( $cm^{-1}$ ): 561(m), 574(m), 611(s), 655(s), 697(vs), 737(s), 773(w), 857(m), 957(vs), 1000(m), 1008(m), 1030(m), 1045(m), 1103(s), 1163(m), 1273(m), 1384(w), 1426(s),1448(w) 1462(m), 1592(m), 1650(w), 2857(w), 2932(w), 3057(w).

Synthetic strategy for **4S**: Using the procedure described above for **3R**, (1S,2S)-cyclohexane-1,2-diamine (0.0228 g, 0.2 mmol) and potassium (4-bromophenyl)triphenylborates (0.0437 g, 0.1 mmol) were combined to give **4S** as light-yellow crystals (yield: 40 mg, 23%, based on dysprosium). Elemental analysis calculated for  $C_{86}H_{81}BBrDyN_6O_3Si_2$  (%): C, 66.38; H, 5.25; N 5.40. Found (%): C, 66.55; H, 4.82; N 5.41. Selected IR ( $cm^{-1}$ ): 561(m), 579(m), 611(s), 655(s), 697(vs), 739(s), 774(w), 860(m), 957(vs), 1000(m), 1008(m), 1030(m), 1045(m), 1103(s), 1163(m), 1273(m), 1384(w), 1426(s),1448(w) 1462(m), 1592(m), 1650(w),2845(w), 2932(w), 3057(w).

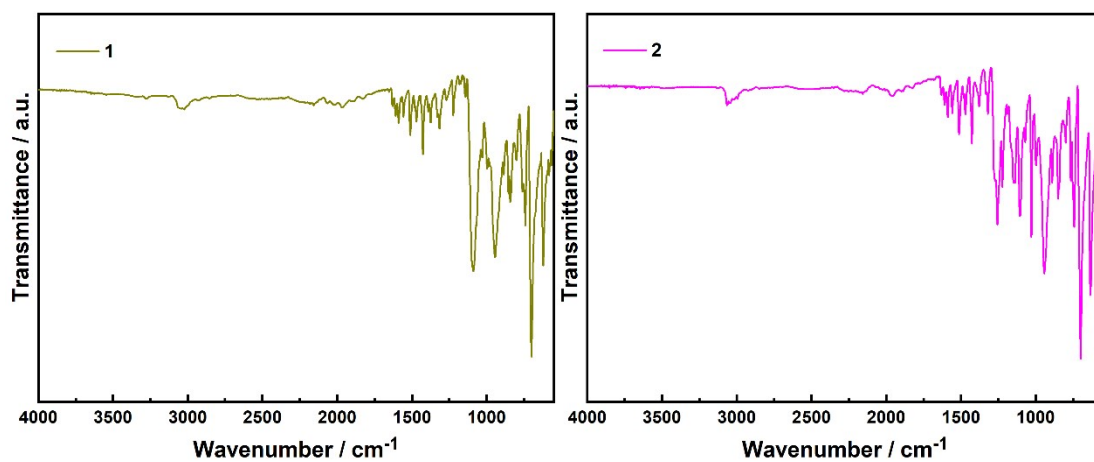

Figure S1. IR spectra of **1** and **2**.

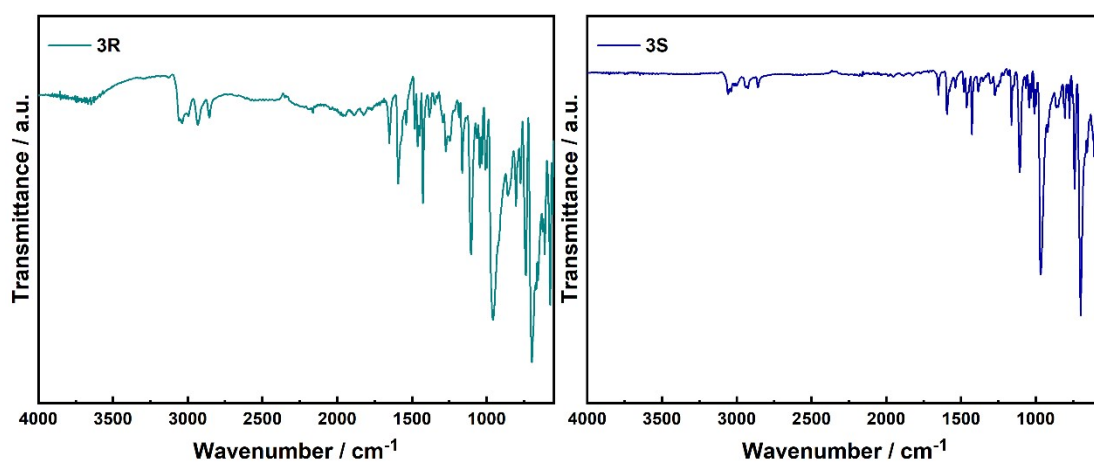

Figure S2. IR spectra of **3R** and **3S**.

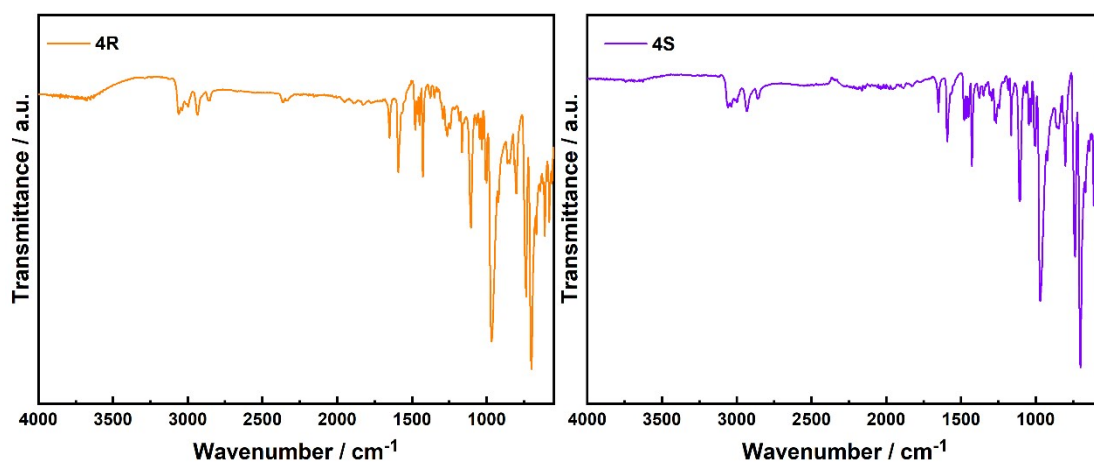

Figure S3. IR spectra of **4R** and **4S**.

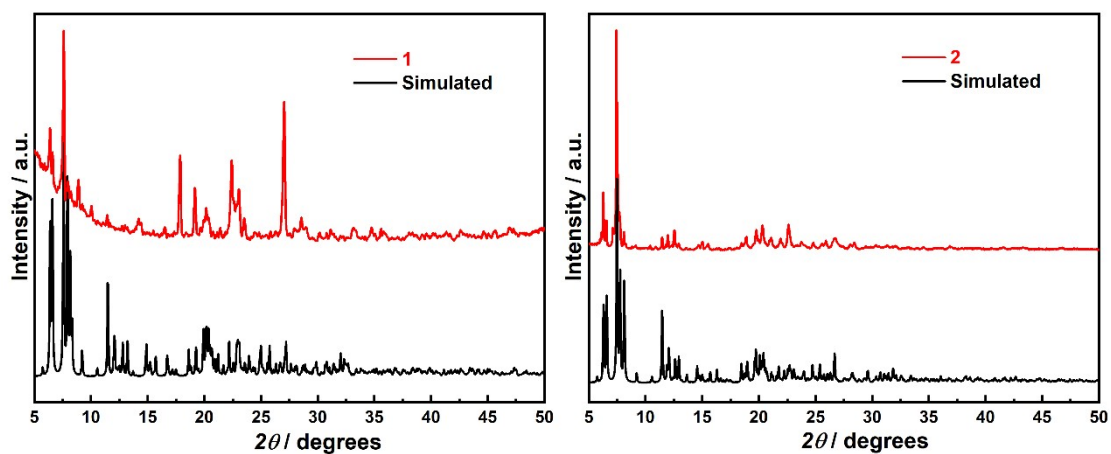

Figure S4. Experimental (red) and simulated (black) PXRD patterns for **1** and **2** in the range of 5-50°.

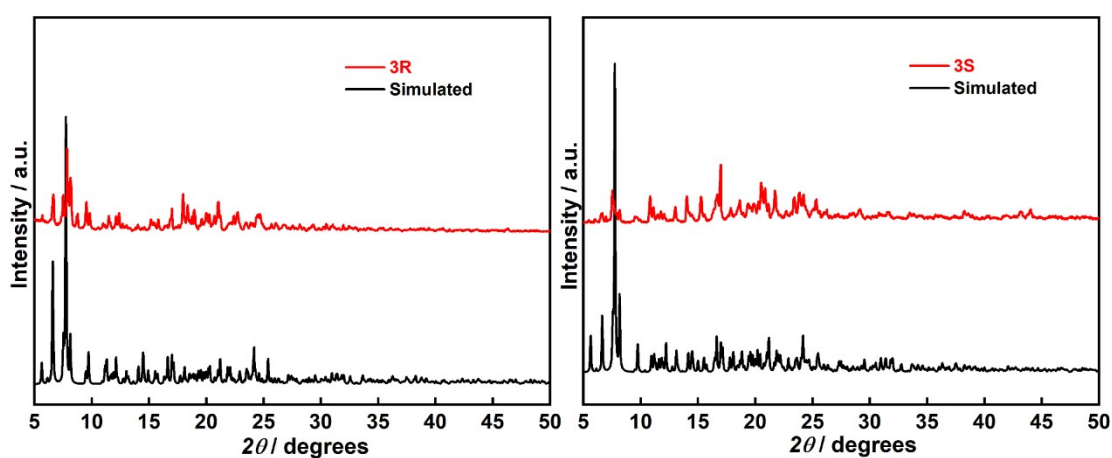

Figure S5. Experimental (red) and simulated (black) PXRD patterns for **3R** and **3S** in the range of 5-50°.

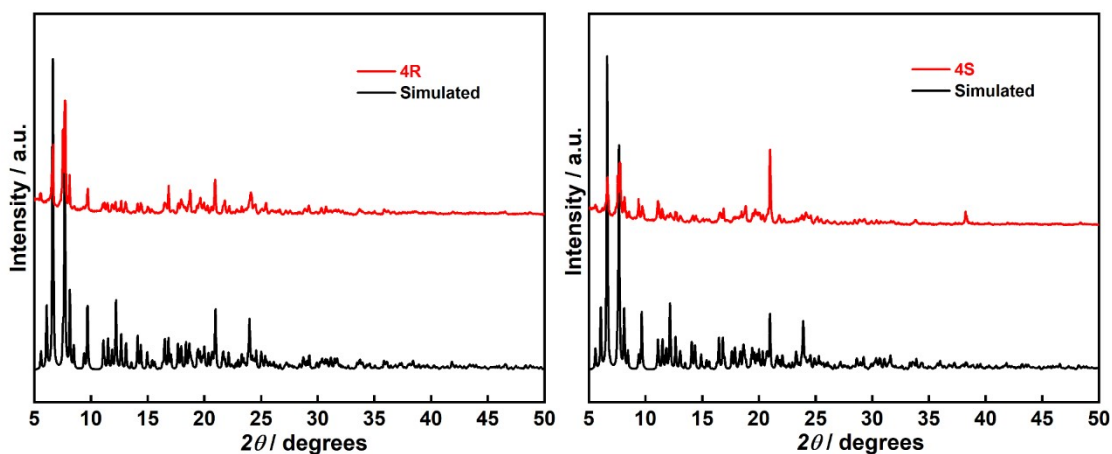

Figure S6. Experimental (red) and simulated (black) PXRD patterns for **4R** and **4S** in the range of 5-50°.

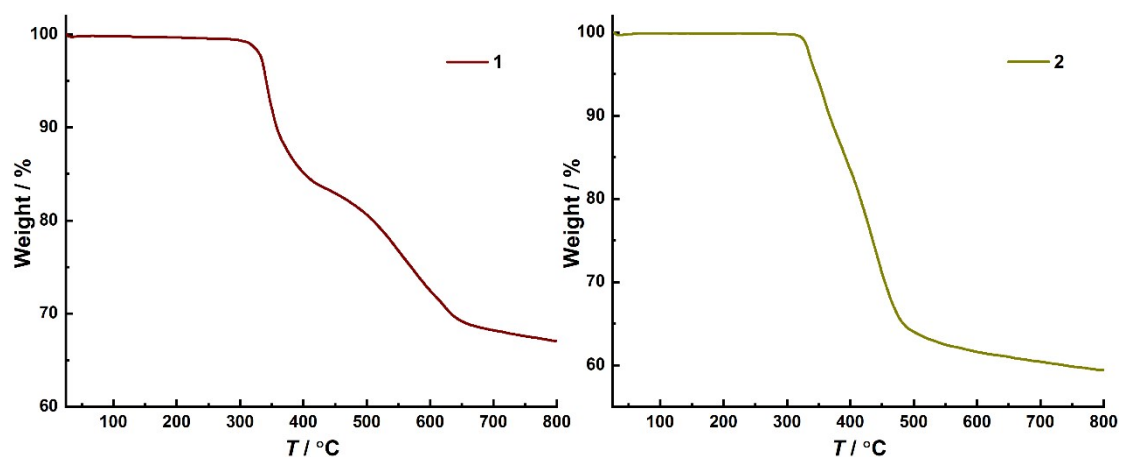

Figure S7. Thermogravimetric analysis for **1** and **2** under N<sub>2</sub> atmosphere.

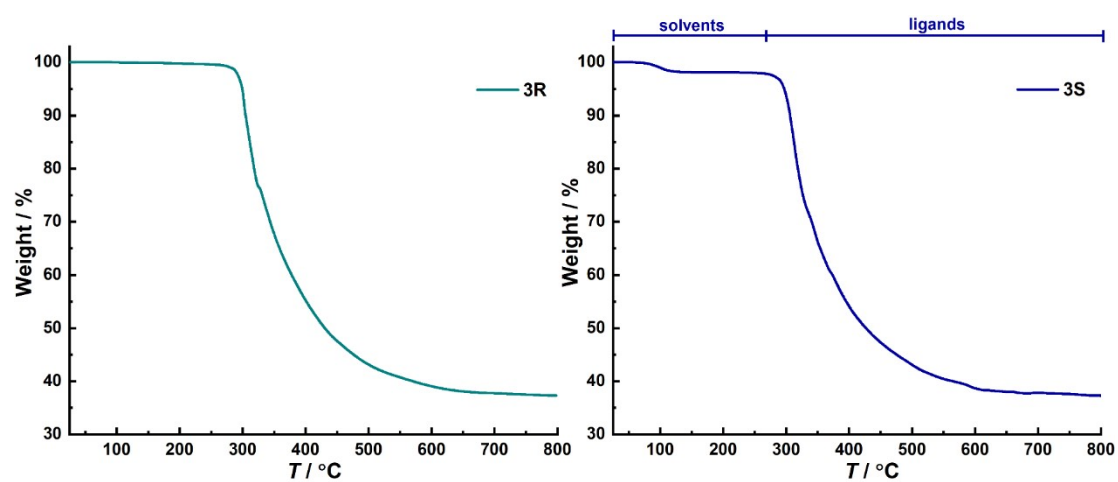

Figure S8. Thermogravimetric analysis for **3R** and **3S** under N<sub>2</sub> atmosphere.

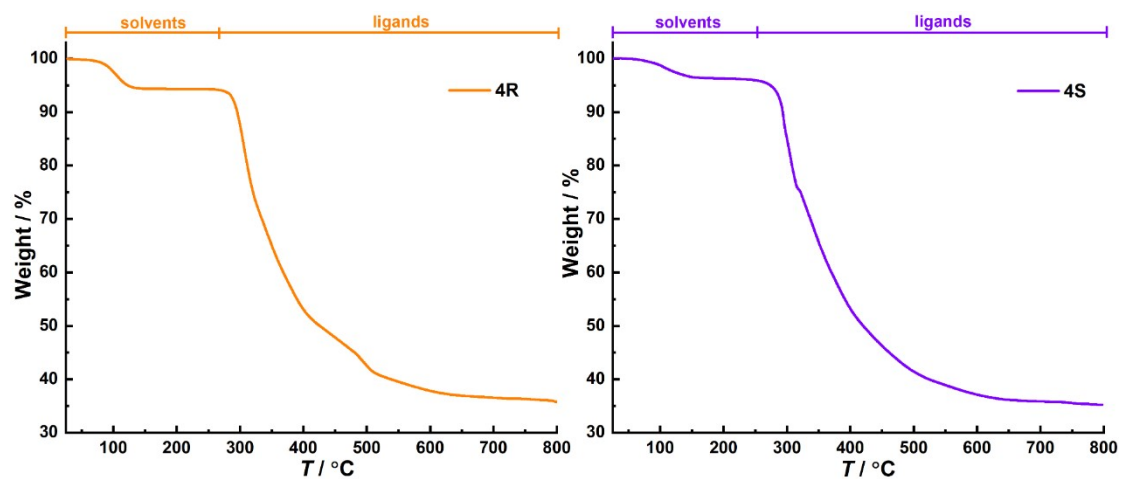

Figure S9. Thermogravimetric analysis for **4R** and **4S** under N<sub>2</sub> atmosphere.

### III. X-ray crystallography

Table S1. Crystallographic data of the precursor complexes **A** and **B**.

| Identification code                                           | <b>A</b>                                                                         | <b>B</b>                                                                     |
|---------------------------------------------------------------|----------------------------------------------------------------------------------|------------------------------------------------------------------------------|
| Empirical formula                                             | C <sub>32</sub> H <sub>27</sub> Cl <sub>3</sub> DyN <sub>7</sub> O <sub>15</sub> | C <sub>26</sub> H <sub>30</sub> Cl <sub>3</sub> DyN <sub>6</sub>             |
| Formula weight                                                | 1018.45                                                                          | 695.41                                                                       |
| Temperature/K                                                 | 180.0                                                                            | 180.0                                                                        |
| Crystal system                                                | orthorhombic                                                                     | monoclinic                                                                   |
| Space group                                                   | <i>Pbca</i>                                                                      | <i>C2/c</i>                                                                  |
| <i>a</i> /Å                                                   | 17.2493(4)                                                                       | 16.9787(7)                                                                   |
| <i>b</i> /Å                                                   | 20.2699(5)                                                                       | 17.1471(7)                                                                   |
| <i>c</i> /Å                                                   | 21.2300(4)                                                                       | 12.8817(5)                                                                   |
| $\alpha$ /°                                                   | 90                                                                               | 90                                                                           |
| $\beta$ /°                                                    | 90                                                                               | 122.593(2)                                                                   |
| $\gamma$ /°                                                   | 90                                                                               | 90                                                                           |
| Volume/Å <sup>3</sup>                                         | 7422.9(3)                                                                        | 3159.7(2)                                                                    |
| <i>Z</i>                                                      | 8                                                                                | 4                                                                            |
| $\rho_{\text{calc}}$ /g/cm <sup>3</sup>                       | 1.823                                                                            | 1.462                                                                        |
| $\mu$ /mm <sup>-1</sup>                                       | 2.311                                                                            | 2.642                                                                        |
| <i>F</i> (000)                                                | 4040.0                                                                           | 1380.0                                                                       |
| Crystal size/mm <sup>3</sup>                                  | 0.15 × 0.12 × 0.1                                                                | 0.23 × 0.2 × 0.1                                                             |
| Radiation                                                     | MoK $\alpha$ ( $\lambda$ = 0.71073)                                              | MoK $\alpha$ ( $\lambda$ = 0.71073)                                          |
| 2 $\theta$ range for data collection/°                        | 4.454 to 52.092                                                                  | 6.538 to 50.106                                                              |
| Index ranges                                                  | -21 ≤ <i>h</i> ≤ 19, -25 ≤ <i>k</i> ≤ 25, -23 ≤ <i>l</i> ≤ 26                    | -20 ≤ <i>h</i> ≤ 20, -20 ≤ <i>k</i> ≤ 20, -15 ≤ <i>l</i> ≤ 13                |
| Reflections collected                                         | 53064                                                                            | 14376                                                                        |
| Independent reflections                                       | 7278 [ <i>R</i> <sub>int</sub> = 0.0314, <i>R</i> <sub>sigma</sub> = 0.0183]     | 2781 [ <i>R</i> <sub>int</sub> = 0.0241, <i>R</i> <sub>sigma</sub> = 0.0176] |
| Data/restraints/parameters                                    | 7278/1373/781                                                                    | 2781/0/164                                                                   |
| Goodness-of-fit on <i>F</i> <sup>2</sup>                      | 1.045                                                                            | 1.109                                                                        |
| Final <i>R</i> indexes [ <i>I</i> >= 2 $\sigma$ ( <i>I</i> )] | <i>R</i> <sub>1</sub> = 0.0669, <i>wR</i> <sub>2</sub> = 0.1898                  | <i>R</i> <sub>1</sub> = 0.0221, <i>wR</i> <sub>2</sub> = 0.0556              |
| Final <i>R</i> indexes [all data]                             | <i>R</i> <sub>1</sub> = 0.0753, <i>wR</i> <sub>2</sub> = 0.1992                  | <i>R</i> <sub>1</sub> = 0.0244, <i>wR</i> <sub>2</sub> = 0.0580              |
| Largest diff. peak/hole / e Å <sup>-3</sup>                   | 2.22/-1.67                                                                       | 0.56/-1.04                                                                   |
| CCDC number                                                   | 2178776                                                                          | 2178777                                                                      |



Table S2. Crystallographic data of complex **1**, **2** and **3R**.

| Identification code                                          | <b>1</b>                                                                          | <b>2</b>                                                                                        | <b>3R</b>                                                                                              |
|--------------------------------------------------------------|-----------------------------------------------------------------------------------|-------------------------------------------------------------------------------------------------|--------------------------------------------------------------------------------------------------------|
| Empirical formula                                            | C <sub>68</sub> H <sub>51</sub> ClDyN <sub>7</sub> O <sub>6</sub> Si <sub>2</sub> | C <sub>69</sub> H <sub>51</sub> DyF <sub>3</sub> N <sub>7</sub> O <sub>5</sub> SSi <sub>2</sub> | C <sub>88</sub> H <sub>85</sub> BBrCl <sub>4</sub> DyN <sub>6</sub> O <sub>3</sub> S<br>i <sub>2</sub> |
| Formula weight                                               | 1316.28                                                                           | 1365.91                                                                                         | 1725.82                                                                                                |
| Temperature/K                                                | 180.0                                                                             | 180.0                                                                                           | 180.0                                                                                                  |
| Crystal system                                               | triclinic                                                                         | triclinic                                                                                       | orthorhombic                                                                                           |
| Space group                                                  | <i>P</i> $\bar{1}$                                                                | <i>P</i> $\bar{1}$                                                                              | <i>P</i> 2 <sub>1</sub> 2 <sub>1</sub> 2 <sub>1</sub>                                                  |
| <i>a</i> /Å                                                  | 14.3908(4)                                                                        | 14.5018(6)                                                                                      | 15.0584(3)                                                                                             |
| <i>b</i> /Å                                                  | 14.8952(4)                                                                        | 15.2412(7)                                                                                      | 18.5883(4)                                                                                             |
| <i>c</i> /Å                                                  | 15.8563(4)                                                                        | 15.9892(7)                                                                                      | 28.7616(8)                                                                                             |
| $\alpha$ /°                                                  | 78.2080(10)                                                                       | 76.6110(10)                                                                                     | 90                                                                                                     |
| $\beta$ /°                                                   | 79.0660(10)                                                                       | 77.9940(10)                                                                                     | 90                                                                                                     |
| $\gamma$ /°                                                  | 69.7140(10)                                                                       | 68.9270(10)                                                                                     | 90                                                                                                     |
| Volume/Å <sup>3</sup>                                        | 3094.52(14)                                                                       | 3177.6(2)                                                                                       | 8050.7(3)                                                                                              |
| <i>Z</i>                                                     | 2                                                                                 | 2                                                                                               | 4                                                                                                      |
| $\rho_{\text{calc}}$ /cm <sup>3</sup>                        | 1.413                                                                             | 1.428                                                                                           | 1.424                                                                                                  |
| $\mu$ /mm <sup>-1</sup>                                      | 1.347                                                                             | 1.311                                                                                           | 1.641                                                                                                  |
| F(000)                                                       | 1334.0                                                                            | 1382.0                                                                                          | 3524.0                                                                                                 |
| Crystal size/mm <sup>3</sup>                                 | 0.23 × 0.18 × 0.02                                                                | 0.1 × 0.08 × 0.02                                                                               | 0.2 × 0.15 × 0.1                                                                                       |
| Radiation                                                    | MoK $\alpha$ ( $\lambda$ = 0.71073)                                               | MoK $\alpha$ ( $\lambda$ = 0.71073)                                                             | MoK $\alpha$ ( $\lambda$ = 0.71073)                                                                    |
| 2 $\theta$ range for data collection/°                       | 4.248 to 52.076                                                                   | 4.252 to 52.138                                                                                 | 4.382 to 50.086                                                                                        |
| Index ranges                                                 | -17 ≤ <i>h</i> ≤ 17, -18 ≤ <i>k</i> ≤ 18, -18 ≤ <i>l</i> ≤ 19                     | -17 ≤ <i>h</i> ≤ 15, -18 ≤ <i>k</i> ≤ 18, -19 ≤ <i>l</i> ≤ 19                                   | -16 ≤ <i>h</i> ≤ 17, -22 ≤ <i>k</i> ≤ 22, -34 ≤ <i>l</i> ≤ 34                                          |
| Reflections collected                                        | 46052                                                                             | 44030                                                                                           | 50443                                                                                                  |
| Independent reflections                                      | 12166 [ <i>R</i> <sub>int</sub> = 0.0386, <i>R</i> <sub>sigma</sub> = 0.0370]     | 12380 [ <i>R</i> <sub>int</sub> = 0.0831, <i>R</i> <sub>sigma</sub> = 0.0952]                   | 14145 [ <i>R</i> <sub>int</sub> = 0.0283, <i>R</i> <sub>sigma</sub> = 0.0376]                          |
| Data/restraints/parameters                                   | 12166/18/767                                                                      | 12380/146/868                                                                                   | 14145/3/943                                                                                            |
| Goodness-of-fit on F <sup>2</sup>                            | 1.057                                                                             | 1.061                                                                                           | 1.057                                                                                                  |
| Final <i>R</i> indexes [ <i>I</i> ≥ 2 $\sigma$ ( <i>I</i> )] | <i>R</i> <sub>1</sub> = 0.0321, w <i>R</i> <sub>2</sub> = 0.0704                  | <i>R</i> <sub>1</sub> = 0.0541, w <i>R</i> <sub>2</sub> = 0.1078                                | <i>R</i> <sub>1</sub> = 0.0358, w <i>R</i> <sub>2</sub> = 0.0992                                       |
| Final <i>R</i> indexes [all data]                            | <i>R</i> <sub>1</sub> = 0.0423, w <i>R</i> <sub>2</sub> = 0.0769                  | <i>R</i> <sub>1</sub> = 0.1016, w <i>R</i> <sub>2</sub> = 0.1307                                | <i>R</i> <sub>1</sub> = 0.0386, w <i>R</i> <sub>2</sub> = 0.1013                                       |
| Largest diff. peak/hole / e Å <sup>-3</sup>                  | 1.10/-1.05                                                                        | 0.70/-1.06                                                                                      | 1.14/-1.31                                                                                             |
| Flack parameter                                              | /                                                                                 | /                                                                                               | -0.001(3)                                                                                              |
| CCDC number                                                  | 2178778                                                                           | 2178779                                                                                         | 2178780                                                                                                |

Table S3. Crystallographic data of complex **3S**, **4R** and **4S**.

| Identification code                                          | <b>3S</b>                                                                                          | <b>4R</b>                                                                                             | <b>4S</b>                                                                                             |
|--------------------------------------------------------------|----------------------------------------------------------------------------------------------------|-------------------------------------------------------------------------------------------------------|-------------------------------------------------------------------------------------------------------|
| Empirical formula                                            | C <sub>88</sub> H <sub>85</sub> BBrCl <sub>4</sub> DyN <sub>6</sub> O <sub>3</sub> Si <sub>2</sub> | C <sub>88</sub> H <sub>85</sub> BBrCl <sub>4</sub> DyN <sub>6</sub><br>O <sub>3</sub> Si <sub>2</sub> | C <sub>88</sub> H <sub>85</sub> BBrCl <sub>4</sub> DyN <sub>6</sub><br>O <sub>3</sub> Si <sub>2</sub> |
| Formula weight                                               | 1725.82                                                                                            | 1725.82                                                                                               | 1725.82                                                                                               |
| Temperature/K                                                | 180.0                                                                                              | 180.0                                                                                                 | 180.0                                                                                                 |
| Crystal system                                               | orthorhombic                                                                                       | orthorhombic                                                                                          | orthorhombic                                                                                          |
| Space group                                                  | <i>P</i> 2 <sub>1</sub> 2 <sub>1</sub> 2 <sub>1</sub>                                              | <i>P</i> 2 <sub>1</sub> 2 <sub>1</sub> 2 <sub>1</sub>                                                 | <i>P</i> 2 <sub>1</sub> 2 <sub>1</sub> 2 <sub>1</sub>                                                 |
| <i>a</i> /Å                                                  | 15.0611(3)                                                                                         | 14.8456(6)                                                                                            | 14.8528(4)                                                                                            |
| <i>b</i> /Å                                                  | 18.5926(5)                                                                                         | 18.6825(7)                                                                                            | 18.6692(4)                                                                                            |
| <i>c</i> /Å                                                  | 28.7604(7)                                                                                         | 28.9361(9)                                                                                            | 28.9684(8)                                                                                            |
| <i>α</i> /°                                                  | 90                                                                                                 | 90                                                                                                    | 90                                                                                                    |
| <i>β</i> /°                                                  | 90                                                                                                 | 90                                                                                                    | 90                                                                                                    |
| <i>γ</i> /°                                                  | 90                                                                                                 | 90                                                                                                    | 90                                                                                                    |
| Volume/Å <sup>3</sup>                                        | 8053.6(3)                                                                                          | 8025.5(5)                                                                                             | 8032.6(4)                                                                                             |
| <i>Z</i>                                                     | 4                                                                                                  | 4                                                                                                     | 4                                                                                                     |
| $\rho_{\text{calc}}$ /g/cm <sup>3</sup>                      | 1.423                                                                                              | 1.428                                                                                                 | 1.427                                                                                                 |
| $\mu$ /mm <sup>-1</sup>                                      | 1.640                                                                                              | 1.646                                                                                                 | 1.644                                                                                                 |
| <i>F</i> (000)                                               | 3524.0                                                                                             | 3524.0                                                                                                | 3524.0                                                                                                |
| Crystal size/mm <sup>3</sup>                                 | 0.2 × 0.15 × 0.1                                                                                   | 0.3 × 0.25 × 0.2                                                                                      | 0.3 × 0.2 × 0.15                                                                                      |
| Radiation                                                    | MoK $\alpha$ ( $\lambda$ = 0.71073)                                                                | MoK $\alpha$ ( $\lambda$ = 0.71073)                                                                   | MoK $\alpha$ ( $\lambda$ = 0.71073)                                                                   |
| 2 $\theta$ range for data collection/°                       | 4.488 to 50.086                                                                                    | 4.36 to 50.06                                                                                         | 3.928 to 50.098                                                                                       |
| Index ranges                                                 | -17 ≤ <i>h</i> ≤ 17, -22 ≤ <i>k</i> ≤ 21,<br>-33 ≤ <i>l</i> ≤ 34                                   | -17 ≤ <i>h</i> ≤ 17, -22 ≤ <i>k</i> ≤ 22,<br>-34 ≤ <i>l</i> ≤ 31                                      | -17 ≤ <i>h</i> ≤ 17, -21 ≤ <i>k</i> ≤ 22,<br>-34 ≤ <i>l</i> ≤ 34                                      |
| Reflections collected                                        | 56587                                                                                              | 52797                                                                                                 | 62832                                                                                                 |
| Independent reflections                                      | 14221 [ <i>R</i> <sub>int</sub> = 0.0565,<br><i>R</i> <sub>sigma</sub> = 0.0550]                   | 14162 [ <i>R</i> <sub>int</sub> = 0.0738,<br><i>R</i> <sub>sigma</sub> = 0.0706]                      | 14166 [ <i>R</i> <sub>int</sub> = 0.0471,<br><i>R</i> <sub>sigma</sub> = 0.0467]                      |
| Data/restraints/parameters                                   | 14221/3/949                                                                                        | 14162/15/934                                                                                          | 14166/9/943                                                                                           |
| Goodness-of-fit on <i>F</i> <sup>2</sup>                     | 1.050                                                                                              | 1.030                                                                                                 | 1.025                                                                                                 |
| Final <i>R</i> indexes [ <i>I</i> ≥ 2 $\sigma$ ( <i>I</i> )] | <i>R</i> <sub>1</sub> = 0.0429, <i>wR</i> <sub>2</sub> =<br>0.1097                                 | <i>R</i> <sub>1</sub> = 0.0596, <i>wR</i> <sub>2</sub> =<br>0.1521                                    | <i>R</i> <sub>1</sub> = 0.0483, <i>wR</i> <sub>2</sub> =<br>0.1294                                    |
| Final <i>R</i> indexes [all data]                            | <i>R</i> <sub>1</sub> = 0.0520, <i>wR</i> <sub>2</sub> =<br>0.1167                                 | <i>R</i> <sub>1</sub> = 0.0709, <i>wR</i> <sub>2</sub> =<br>0.1608                                    | <i>R</i> <sub>1</sub> = 0.0530, <i>wR</i> <sub>2</sub> =<br>0.1332                                    |
| Largest diff. peak/hole / e Å <sup>-3</sup>                  | 1.03/-1.44                                                                                         | 1.87/-2.44                                                                                            | 2.50/-2.21                                                                                            |
| Flack parameter                                              | -0.007(5)                                                                                          | 0.005(6)                                                                                              | 0.006(4)                                                                                              |
| CCDC number                                                  | 2178781                                                                                            | 2178782                                                                                               | 2178783                                                                                               |

Table S4. Selected bond distances and angles for complex **1** (Å, °).

|           |           |           |           |
|-----------|-----------|-----------|-----------|
| Dy1-O1    | 2.141(2)  | Dy1-N6    | 2.680(2)  |
| Dy1-O2    | 2.138(2)  | Dy1-N2    | 2.678(3)  |
| Dy1-N3    | 2.695(3)  | Dy1-N5    | 2.646(2)  |
| Dy1-N1    | 2.676(2)  | Dy1-N4    | 2.642(3)  |
| O1-Dy1-N3 | 86.34(8)  | N1-Dy1-N6 | 59.71(8)  |
| O1-Dy1-N1 | 100.53(8) | N1-Dy1-N2 | 60.90(8)  |
| O1-Dy1-N6 | 89.40(8)  | N6-Dy1-N3 | 175.65(8) |
| O1-Dy1-N2 | 90.66(8)  | N2-Dy1-N3 | 59.74(8)  |
| O1-Dy1-N5 | 81.70(8)  | N2-Dy1-N6 | 119.49(8) |
| O1-Dy1-N4 | 91.22(8)  | N5-Dy1-N3 | 119.60(8) |
| O2-Dy1-O1 | 175.53(8) | N5-Dy1-N1 | 120.13(8) |
| O2-Dy1-N3 | 89.93(8)  | N5-Dy1-N6 | 60.50(8)  |
| O2-Dy1-N1 | 83.47(8)  | N5-Dy1-N2 | 172.36(8) |
| O2-Dy1-N6 | 94.36(8)  | N4-Dy1-N3 | 60.90(8)  |
| O2-Dy1-N2 | 89.59(8)  | N4-Dy1-N1 | 168.22(8) |
| O2-Dy1-N5 | 98.05(8)  | N4-Dy1-N6 | 120.16(8) |
| O2-Dy1-N4 | 84.81(8)  | N4-Dy1-N2 | 120.33(8) |
| N1-Dy1-N3 | 120.25(8) | N4-Dy1-N5 | 60.45(8)  |

Table S5. Selected bond distances and angles for complex **2** (Å, °).

|           |            |           |            |
|-----------|------------|-----------|------------|
| Dy1-O1    | 2.142(4)   | Dy1-N3    | 2.704(4)   |
| Dy1-O2    | 2.129(4)   | Dy1-N6    | 2.667(5)   |
| Dy1-N1    | 2.665(4)   | Dy1-N2    | 2.676(4)   |
| Dy1-N5    | 2.646(4)   | Dy1-N4    | 2.652(4)   |
| O1-Dy1-N1 | 99.32(14)  | N1-Dy1-N6 | 60.03(14)  |
| O1-Dy1-N5 | 83.26(14)  | N1-Dy1-N2 | 60.74(14)  |
| O1-Dy1-N3 | 86.36(14)  | N5-Dy1-N1 | 120.53(14) |
| O1-Dy1-N6 | 88.78(15)  | N5-Dy1-N3 | 119.48(14) |
| O1-Dy1-N2 | 90.40(14)  | N5-Dy1-N6 | 60.65(14)  |
| O1-Dy1-N4 | 92.32(14)  | N5-Dy1-N2 | 173.66(15) |
| O2-Dy1-O1 | 177.05(15) | N5-Dy1-N4 | 60.19(14)  |
| O2-Dy1-N1 | 83.22(14)  | N6-Dy1-N3 | 175.06(14) |
| O2-Dy1-N5 | 96.75(14)  | N6-Dy1-N2 | 119.72(14) |
| O2-Dy1-N3 | 91.09(14)  | N2-Dy1-N3 | 59.52(14)  |
| O2-Dy1-N6 | 93.80(14)  | N4-Dy1-N1 | 168.35(14) |
| O2-Dy1-N2 | 89.56(14)  | N4-Dy1-N3 | 60.91(14)  |
| O2-Dy1-N4 | 85.15(14)  | N4-Dy1-N6 | 120.23(14) |
| N1-Dy1-N3 | 119.99(13) | N4-Dy1-N2 | 120.03(14) |

Table S6. Selected bond distances and angles for complex **3R** (Å, °).

|           |            |           |            |
|-----------|------------|-----------|------------|
| Dy1-O1    | 2.131(4)   | Dy1-N5    | 2.720(5)   |
| Dy1-O2    | 2.138(4)   | Dy1-N4    | 2.632(5)   |
| Dy1-N1    | 2.628(5)   | Dy1-N2    | 2.660(5)   |
| Dy1-N6    | 2.650(5)   | Dy1-N3    | 2.608(5)   |
| O1-Dy1-O2 | 175.4(2)   | N1-Dy1-N5 | 117.30(18) |
| O1-Dy1-N1 | 95.67(17)  | N1-Dy1-N4 | 162.24(17) |
| O1-Dy1-N6 | 83.84(17)  | N1-Dy1-N2 | 61.60(17)  |
| O1-Dy1-N5 | 97.34(19)  | N6-Dy1-N5 | 59.78(17)  |
| O1-Dy1-N4 | 102.07(17) | N6-Dy1-N2 | 121.73(17) |
| O1-Dy1-N2 | 91.50(18)  | N4-Dy1-N6 | 119.68(17) |
| O1-Dy1-N3 | 81.89(18)  | N4-Dy1-N5 | 59.93(17)  |
| O2-Dy1-N1 | 83.91(17)  | N4-Dy1-N2 | 118.07(17) |
| O2-Dy1-N6 | 99.87(18)  | N2-Dy1-N5 | 171.15(16) |
| O2-Dy1-N5 | 86.86(19)  | N3-Dy1-N1 | 122.53(17) |
| O2-Dy1-N4 | 78.47(18)  | N3-Dy1-N6 | 165.55(16) |
| O2-Dy1-N2 | 84.29(18)  | N3-Dy1-N5 | 119.96(17) |
| O2-Dy1-N3 | 94.49(18)  | N3-Dy1-N4 | 61.68(17)  |
| N1-Dy1-N6 | 61.19(17)  | N3-Dy1-N2 | 61.09(16)  |

Table S7. Selected bond distances and angles for complex **3S** (Å, °).

|           |          |           |          |
|-----------|----------|-----------|----------|
| Dy1-O1    | 2.133(5) | Dy1-N5    | 2.718(6) |
| Dy1-O2    | 2.137(5) | Dy1-N4    | 2.628(7) |
| Dy1-N1    | 2.616(7) | Dy1-N2    | 2.656(6) |
| Dy1-N6    | 2.653(7) | Dy1-N3    | 2.597(7) |
| O1-Dy1-N1 | 95.4(2)  | O2-Dy1-N4 | 78.6(2)  |
| O1-Dy1-O2 | 175.0(3) | O2-Dy1-N2 | 84.2(2)  |
| O1-Dy1-N6 | 84.0(2)  | O2-Dy1-N3 | 94.5(2)  |
| O1-Dy1-N5 | 97.7(2)  | N6-Dy1-N5 | 59.8(2)  |
| O1-Dy1-N4 | 102.3(2) | N6-Dy1-N2 | 121.6(2) |
| O1-Dy1-N2 | 91.1(2)  | N4-Dy1-N6 | 119.9(2) |
| O1-Dy1-N3 | 81.7(2)  | N4-Dy1-N5 | 60.0(2)  |
| N1-Dy1-N6 | 61.0(2)  | N4-Dy1-N2 | 118.0(2) |
| N1-Dy1-N5 | 117.2(2) | N2-Dy1-N5 | 171.2(2) |
| N1-Dy1-N4 | 162.3(2) | N3-Dy1-N1 | 122.7(2) |
| N1-Dy1-N2 | 61.7(2)  | N3-Dy1-N6 | 165.5(2) |
| O2-Dy1-N1 | 83.9(2)  | N3-Dy1-N5 | 119.9(2) |
| O2-Dy1-N6 | 99.9(2)  | N3-Dy1-N4 | 61.5(2)  |
| O2-Dy1-N5 | 87.0(2)  | N3-Dy1-N2 | 61.2(2)  |

Table S8. Selected bond distances and angles for complex **4R** (Å, °).

|           |          |           |           |
|-----------|----------|-----------|-----------|
| Dy1-O1    | 2.145(7) | Dy1-N6    | 2.699(8)  |
| Dy1-O2    | 2.136(7) | Dy1-N1    | 2.631(9)  |
| Dy1-N4    | 2.619(9) | Dy1-N2    | 2.618(9)  |
| Dy1-N3    | 2.670(9) | Dy1-N5    | 2.632(10) |
| O1-Dy1-N4 | 83.4(3)  | O2-Dy1-N1 | 101.9(3)  |
| O1-Dy1-N3 | 84.9(3)  | O2-Dy1-N2 | 83.8(3)   |
| O1-Dy1-N6 | 85.3(3)  | O2-Dy1-N5 | 82.1(3)   |
| O1-Dy1-N1 | 79.2(3)  | N3-Dy1-N6 | 170.2(3)  |
| O1-Dy1-N2 | 95.8(3)  | N1-Dy1-N3 | 117.5(3)  |
| O1-Dy1-N5 | 98.4(3)  | N1-Dy1-N6 | 60.3(3)   |
| N4-Dy1-N3 | 61.2(3)  | N1-Dy1-N5 | 120.5(3)  |
| N4-Dy1-N6 | 117.6(3) | N2-Dy1-N4 | 122.0(3)  |
| N4-Dy1-N1 | 162.6(3) | N2-Dy1-N3 | 61.0(3)   |
| N4-Dy1-N5 | 61.3(3)  | N2-Dy1-N6 | 120.1(3)  |
| O2-Dy1-O1 | 178.4(4) | N2-Dy1-N1 | 61.2(3)   |
| O2-Dy1-N4 | 95.5(3)  | N2-Dy1-N5 | 165.8(3)  |
| O2-Dy1-N3 | 93.6(3)  | N5-Dy1-N3 | 121.5(3)  |
| O2-Dy1-N6 | 96.3(3)  | N5-Dy1-N6 | 60.3(3)   |

Table S9. Selected bond distances and angles for complex **4S** (Å, °).

|           |          |           |          |
|-----------|----------|-----------|----------|
| Dy1-O1    | 2.141(5) | Dy1-N2    | 2.623(7) |
| Dy1-O2    | 2.140(6) | Dy1-N6    | 2.702(7) |
| Dy1-N3    | 2.670(7) | Dy1-N1    | 2.628(7) |
| Dy1-N4    | 2.632(7) | Dy1-N5    | 2.634(7) |
| O1-Dy1-N4 | 83.3(2)  | O2-Dy1-N1 | 101.8(2) |
| O1-Dy1-N3 | 85.2(2)  | O2-Dy1-N5 | 81.7(2)  |
| O1-Dy1-N2 | 95.7(2)  | N3-Dy1-N6 | 170.2(2) |
| O1-Dy1-N6 | 85.0(2)  | N2-Dy1-N4 | 122.0(2) |
| O1-Dy1-N1 | 79.0(2)  | N2-Dy1-N3 | 60.8(2)  |
| O1-Dy1-N5 | 98.3(2)  | N2-Dy1-N6 | 120.2(2) |
| N4-Dy1-N3 | 61.3(2)  | N2-Dy1-N1 | 61.2(2)  |
| N4-Dy1-N6 | 117.4(2) | N2-Dy1-N5 | 166.0(2) |
| N4-Dy1-N5 | 61.3(2)  | N1-Dy1-N4 | 162.2(2) |
| O2-Dy1-O1 | 179.1(3) | N1-Dy1-N3 | 117.4(2) |
| O2-Dy1-N4 | 96.0(2)  | N1-Dy1-N6 | 60.4(2)  |
| O2-Dy1-N3 | 94.0(3)  | N1-Dy1-N5 | 120.5(2) |
| O2-Dy1-N2 | 84.3(2)  | N5-Dy1-N3 | 121.6(2) |
| O2-Dy1-N6 | 95.8(3)  | N5-Dy1-N6 | 60.1(2)  |

Table S10. The CShM values calculated by SHAPE 2.1 for **1** and **2**.<sup>8,9</sup>

| Central atom | Coordination Geometry                       | <b>1</b>     | <b>2</b>     |
|--------------|---------------------------------------------|--------------|--------------|
| Dy           | Octagon ( $D_{8h}$ )                        | 29.252       | 29.595       |
|              | Heptagonal pyramid ( $C_{7v}$ )             | 20.877       | 21.260       |
|              | Hexagonal bipyramid ( $D_{6h}$ )            | <b>1.347</b> | <b>1.281</b> |
|              | Cube ( $O_h$ )                              | 9.676        | 9.623        |
|              | Square antiprism ( $D_{4d}$ )               | 17.729       | 17.739       |
|              | Triangular dodecahedron ( $D_{2d}$ )        | 15.216       | 15.083       |
|              | Johnson gyrobifastigium J26 ( $D_{2d}$ )    | 7.660        | 7.831        |
|              | Biaugmented trigonal prism J50 ( $C_{2v}$ ) | 16.592       | 16.600       |
|              | Biaugmented trigonal prism ( $C_{2v}$ )     | 16.361       | 16.467       |
|              | Snub diphenooid J84 ( $D_{2d}$ )            | 16.559       | 16.674       |
|              | Triakis tetrahedron ( $T_d$ )               | 10.524       | 10.461       |
|              | Elongated trigonal bipyramid ( $D_{3h}$ )   | 20.998       | 21.280       |

Table S11. The CShM values calculated by SHAPE 2.1 for **3R** and **3S**.<sup>8,9</sup>

| Central atom | Coordination Geometry                       | <b>3R</b>    | <b>3S</b>    |
|--------------|---------------------------------------------|--------------|--------------|
| Dy           | Octagon ( $D_{8h}$ )                        | 30.575       | 30.493       |
|              | Heptagonal pyramid ( $C_{7v}$ )             | 21.613       | 21.564       |
|              | Hexagonal bipyramid ( $D_{6h}$ )            | <b>1.977</b> | <b>1.964</b> |
|              | Cube ( $O_h$ )                              | 10.278       | 10.240       |
|              | Square antiprism ( $D_{4d}$ )               | 16.775       | 16.750       |
|              | Triangular dodecahedron ( $D_{2d}$ )        | 14.584       | 14.592       |
|              | Johnson gyrobifastigium J26 ( $D_{2d}$ )    | 6.138        | 6.154        |
|              | Biaugmented trigonal prism J50 ( $C_{2v}$ ) | 15.410       | 15.388       |
|              | Biaugmented trigonal prism ( $C_{2v}$ )     | 15.260       | 15.272       |
|              | Snub diphenooid J84 ( $D_{2d}$ )            | 15.288       | 15.264       |
|              | Triakis tetrahedron ( $T_d$ )               | 10.988       | 10.933       |
|              | Elongated trigonal bipyramid ( $D_{3h}$ )   | 21.007       | 20.908       |

Table S12. The CShM values calculated by SHAPE 2.1 for **4R** and **4S**.<sup>8,9</sup>

| Central atom | Coordination Geometry                       | <b>4R</b>    | <b>4S</b>    |
|--------------|---------------------------------------------|--------------|--------------|
| Dy           | Octagon ( $D_{8h}$ )                        | 30.728       | 30.752       |
|              | Heptagonal pyramid ( $C_{7v}$ )             | 22.266       | 22.180       |
|              | Hexagonal bipyramid ( $D_{6h}$ )            | <b>1.897</b> | <b>1.909</b> |
|              | Cube ( $O_h$ )                              | 10.255       | 10.347       |
|              | Square antiprism ( $D_{4d}$ )               | 16.540       | 16.604       |
|              | Triangular dodecahedron ( $D_{2d}$ )        | 14.328       | 14.386       |
|              | Johnson gyrobifastigium J26 ( $D_{2d}$ )    | 6.155        | 6.119        |
|              | Biaugmented trigonal prism J50 ( $C_{2v}$ ) | 15.076       | 15.104       |
|              | Biaugmented trigonal prism ( $C_{2v}$ )     | 14.949       | 14.957       |
|              | Snub diphenooid J84 ( $D_{2d}$ )            | 15.170       | 15.204       |
|              | Triakis tetrahedron ( $T_d$ )               | 10.940       | 11.035       |
|              | Elongated trigonal bipyramid ( $D_{3h}$ )   | 21.205       | 21.221       |

Table S13. Selected intermolecular interactions for **1**<sup>a</sup>.

|                     |                      | Length/ Å | Length-VdW/ Å |
|---------------------|----------------------|-----------|---------------|
| $\pi \cdots \pi$    | C18 $\cdots$ C3      | 3.372     | -0.028        |
|                     | C32 $\cdots$ C34     | 3.395     | -0.005        |
| C-H $\cdots$ $\pi$  | C39-H39 $\cdots$ C41 | 2.782     | -0.118        |
|                     | C39-H39 $\cdots$ C49 | 2.877     | -0.023        |
|                     | C7-H7 $\cdots$ C50   | 2.894     | -0.006        |
|                     | C45-H45 $\cdots$ C40 | 2.814     | -0.086        |
|                     | C3-H3 $\cdots$ C62   | 2.831     | -0.069        |
|                     | C52-H52 $\cdots$ C26 | 2.599     | -0.301        |
|                     | C52-H52 $\cdots$ C48 | 2.601     | -0.299        |
| C-H $\cdots$ O      | C35-H35 $\cdots$ O6  | 2.538     | -0.182        |
|                     | C13-H13 $\cdots$ O6  | 2.665     | -0.055        |
|                     | C18-H18 $\cdots$ O5  | 2.719     | -0.001        |
|                     | C18-H18 $\cdots$ O4  | 2.513     | -0.207        |
|                     | C58-H58 $\cdots$ O4  | 2.691     | -0.029        |
|                     | C62-H62 $\cdots$ O5  | 2.461     | -0.259        |
|                     | C34-H34 $\cdots$ O4  | 2.705     | -0.015        |
| C51-H51 $\cdots$ O3 | 2.47                 | -0.25     |               |
| C-H $\cdots$ N      | C24-H24 $\cdots$ N7  | 2.613     | -0.137        |
| C-H $\cdots$ Si     | C45-H45 $\cdots$ Si1 | 3.245     | -0.055        |

<sup>a</sup> Short contacts are given for distances inferior to the sum of van der Waals radii.

Table S14. Selected intermolecular interactions for **2**<sup>a</sup>.

|                    |                       | Length/ Å | Length-VdW/ Å |
|--------------------|-----------------------|-----------|---------------|
| C-H $\cdots$ $\pi$ | C29-H29 $\cdots$ C66  | 2.746     | -0.154        |
|                    | C29-H29 $\cdots$ C45  | 2.876     | -0.024        |
|                    | C34-H34 $\cdots$ C36  | 2.647     | -0.253        |
|                    | C34-H34 $\cdots$ C52  | 2.654     | -0.246        |
|                    | C35-H35 $\cdots$ C18  | 2.885     | -0.015        |
|                    | C53-H53 $\cdots$ C48  | 2.893     | -0.007        |
|                    | C67-H67C $\cdots$ C33 | 2.852     | -0.048        |
| C-H $\cdots$ F     | C41-H41 $\cdots$ F6   | 2.278     | -0.392        |
|                    | C25-H25 $\cdots$ F4   | 2.507     | -0.163        |
|                    | C60-H60 $\cdots$ F4   | 2.488     | -0.182        |
|                    | C38-H38 $\cdots$ F5   | 2.479     | -0.191        |
|                    | C42-H42 $\cdots$ F5   | 2.531     | -0.139        |
| C-H $\cdots$ O     | C67-H67A $\cdots$ O4  | 2.008     | -0.712        |
|                    | C48-H48 $\cdots$ O5   | 2.705     | -0.015        |
| C-H $\cdots$ N     | C30-H30 $\cdots$ N7   | 2.621     | -0.129        |
| C-H $\cdots$ Si    | C35-H35 $\cdots$ Si2  | 3.264     | -0.036        |

<sup>a</sup> Short contacts are given for distances inferior to the sum of van der Waals radii.

Table S15. Selected intermolecular interactions for **3R**<sup>a</sup>.

|                       |                       | Length/ Å | Length-VdW/ Å |
|-----------------------|-----------------------|-----------|---------------|
| C-H $\cdots\pi$       | C20-H20 $\cdots$ C72  | 2.847     | -0.053        |
|                       | C20-H20 $\cdots$ C65  | 2.814     | -0.086        |
|                       | C20-H20 $\cdots$ C69  | 2.837     | -0.063        |
|                       | C46-H46 $\cdots$ C11  | 2.747     | -0.153        |
|                       | C81-H81 $\cdots$ C73  | 2.859     | -0.041        |
|                       | C81-H81 $\cdots$ C39  | 2.868     | -0.032        |
|                       | C50-H50 $\cdots$ C7   | 2.866     | -0.034        |
|                       | C18-H18 $\cdots$ C49  | 2.844     | -0.056        |
|                       | C18-H18 $\cdots$ C31  | 2.845     | -0.055        |
|                       | C32-H32 $\cdots$ C38  | 2.892     | -0.008        |
|                       | C32-H32 $\cdots$ C33  | 2.883     | -0.017        |
|                       | C9-H9 $\cdots$ C68    | 2.813     | -0.087        |
|                       | C23-H23A $\cdots$ C17 | 2.844     | -0.056        |
|                       | C45-H45 $\cdots$ C83  | 2.85      | -0.05         |
|                       | C83-H83 $\cdots$ C45  | 2.863     | -0.037        |
| C87-H87B $\cdots$ C47 | 2.795                 | -0.105    |               |
| C-H $\cdots$ Cl       | C69-H69 $\cdots$ Cl1  | 2.939     | -0.011        |
|                       | C19-H19 $\cdots$ Cl4  | 2.684     | -0.266        |
| C-H $\cdots$ Br       | C60-H60B $\cdots$ Br1 | 3.008     | -0.042        |

<sup>a</sup> Short contacts are given for distances inferior to the sum of van der Waals radii.

Table S16. Selected intermolecular interactions for **3S**<sup>a</sup>.

|                       |                       | Length/ Å | Length-VdW/ Å |
|-----------------------|-----------------------|-----------|---------------|
| C-H $\cdots\pi$       | C50-H50 $\cdots$ C51  | 2.841     | -0.059        |
|                       | C50-H50 $\cdots$ C67  | 2.798     | -0.102        |
|                       | C50-H50 $\cdots$ C35  | 2.81      | -0.09         |
|                       | C86-H86 $\cdots$ C7   | 2.741     | -0.159        |
|                       | C5-H5 $\cdots$ C77    | 2.873     | -0.027        |
|                       | C5-H5 $\cdots$ C41    | 2.866     | -0.034        |
|                       | C11-H11 $\cdots$ C9   | 2.872     | -0.028        |
|                       | C20-H20 $\cdots$ C55  | 2.841     | -0.059        |
|                       | C20-H20 $\cdots$ C65  | 2.859     | -0.041        |
|                       | C70-H70 $\cdots$ C39  | 2.894     | -0.006        |
|                       | C79-H79 $\cdots$ C74  | 2.822     | -0.078        |
|                       | C60-H60A $\cdots$ C63 | 2.831     | -0.069        |
|                       | C45-H45 $\cdots$ C81  | 2.869     | -0.031        |
|                       | C81-H81 $\cdots$ C45  | 2.878     | -0.022        |
|                       | C43-H43A $\cdots$ C4  | 2.884     | -0.016        |
| C87-H87B $\cdots$ C53 | 2.806                 | -0.094    |               |
| C-H $\cdots$ Cl       | C19-H19 $\cdots$ Cl4  | 2.695     | -0.255        |
| C-H $\cdots$ Br       | C80-H80A $\cdots$ Br1 | 3.000     | -0.05         |

<sup>a</sup> Short contacts are given for distances inferior to the sum of van der Waals radii.

Table S17. Selected intermolecular interactions for **4R**<sup>a</sup>.



|              |                | Length/ Å | Length-VdW/ Å |
|--------------|----------------|-----------|---------------|
| C-H... $\pi$ | C22-H22...C21  | 2.755     | -0.145        |
|              | C36-H36...C47  | 2.785     | -0.115        |
|              | C36-H36...C66  | 2.879     | -0.021        |
|              | C36-H36...C73  | 2.879     | -0.021        |
|              | C38-H38A...C13 | 2.883     | -0.017        |
|              | C13-H13...C79  | 2.753     | -0.147        |
|              | C87-H87...C49  | 2.886     | -0.014        |
|              | C39-H39...C79  | 2.768     | -0.132        |
|              | C27-H27...C33  | 2.855     | -0.045        |
|              | C27-H27...C34  | 2.824     | -0.076        |
|              | C32-H32...C65  | 2.815     | -0.085        |
|              | C41-H41...C69  | 2.864     | -0.036        |
|              | C80-H80...C9   | 2.899     | -0.001        |
|              | C85-H85B...C59 | 2.895     | -0.005        |
| C-H...Cl     | C88-H88...Cl1  | 2.649     | -0.301        |
| C-H...Br     | C68-H68...Br1  | 2.713     | -0.337        |
|              | C84-H84...Br1  | 3.027     | -0.023        |

<sup>a</sup> Short contacts are given for distances inferior to the sum of van der Waals radii.

Table S18. Selected intermolecular interactions for 4S<sup>a</sup>.

|              |                | Length/ Å | Length-VdW/ Å |
|--------------|----------------|-----------|---------------|
| C-H... $\pi$ | C28-H28...C12  | 2.739     | -0.161        |
|              | C46-H46...C50  | 2.802     | -0.098        |
|              | C46-H46...C65  | 2.891     | -0.009        |
|              | C46-H46...C70  | 2.886     | -0.014        |
|              | C39-H39B...C25 | 2.889     | -0.011        |
|              | C25-H25...C82  | 2.731     | -0.169        |
|              | C84-H84...C44  | 2.896     | -0.004        |
|              | C35-H35...C82  | 2.818     | -0.082        |
|              | C22-H22...C33  | 2.842     | -0.058        |
|              | C22-H22...C34  | 2.861     | -0.039        |
|              | C15-H15...C26  | 2.894     | -0.006        |
|              | C32-H32...C63  | 2.868     | -0.032        |
|              | C48-H48...C77  | 2.822     | -0.078        |
|              | C75-H75...C13  | 2.888     | -0.012        |
|              | C87-H87A...C52 | 2.877     | -0.023        |
|              | C87-H87B...C60 | 2.89      | -0.01         |
| C-H...Cl     | C83-H83...Cl1  | 2.65      | -0.3          |
| C-H...Br     | C88-H88A...Br1 | 2.941     | -0.109        |
|              | C85-H85...Br1  | 3.049     | -0.001        |
|              | C68-H68...Br1  | 2.72      | -0.33         |

<sup>a</sup> Short contacts are given for distances inferior to the sum of van der Waals radii.

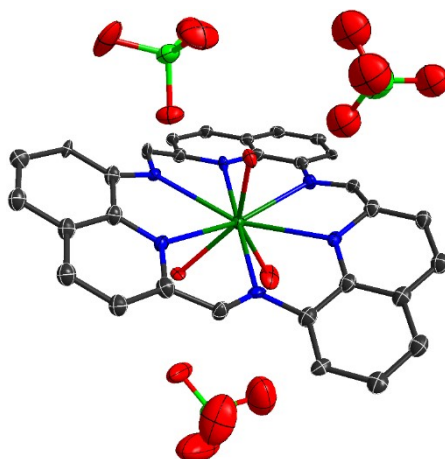

Figure S10. Thermal ellipsoid representations (30% probability) of the molecular structure of precursor **A**. Dy, dark green; Cl, bright green; O, red; N, blue; C, grey. For clarity, H atoms and lattice solvents are omitted.

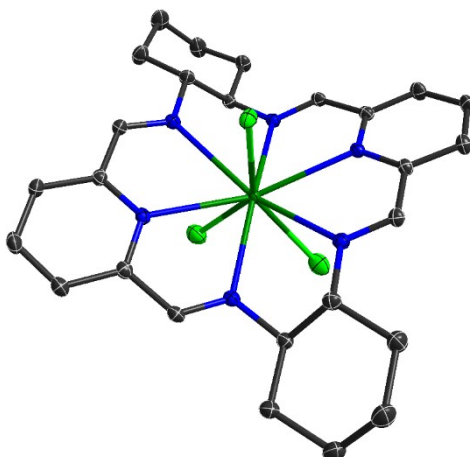

Figure S11. Thermal ellipsoid representations (30% probability) of the molecular structure of precursor (RRRR)-**B**. Dy, dark green; Cl, bright green; N, blue; C, grey. For clarity, H atoms and lattice solvents are omitted.

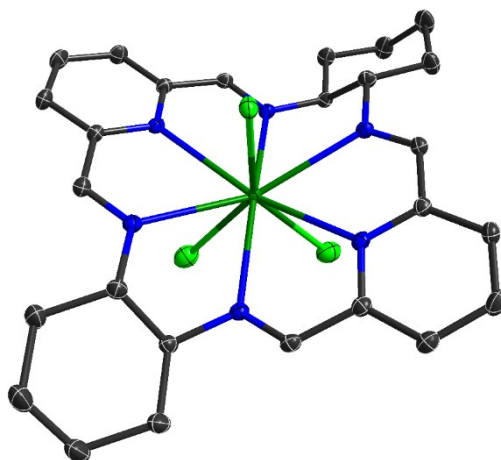

Figure S12. Thermal ellipsoid representations (30% probability) of the molecular structure of precursor (SSSS)-**B**. Dy, dark green; Cl, bright green; N, blue; C, grey. For clarity, H atoms and lattice solvents are omitted.

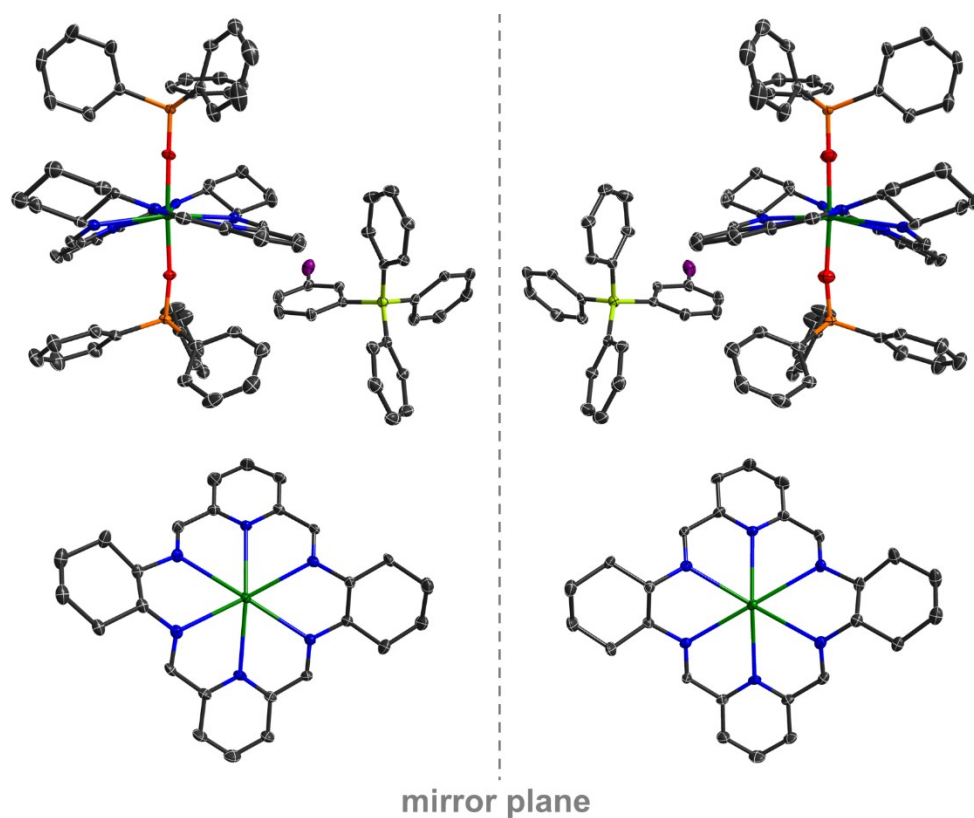

Figure S13 Thermal ellipsoid representations (30% probability) of the molecular structures (upper) and equatorial coordination environment (bottom) of **3R** (left) and **3S** (right). Dy, dark green; Br, violet; Si, orange; O, red; N, blue; C, grey; B, lime. For clarity, H atoms and lattice solvents are omitted.

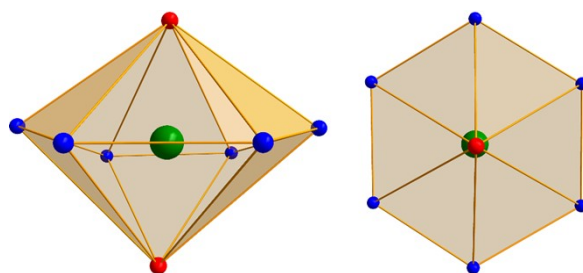

Figure S14. Polyhedron viewed from the side (left) and the top (right) showing hexagonal bipyramidal geometry of complex **2**. Dy, dark green; O, red; N, blue.

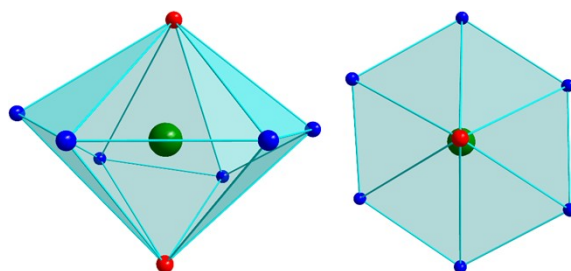

Figure S15 Polyhedron viewed from the side (left) and the top (right) showing hexagonal bipyramidal geometry of complex **3R**. Dy, dark green; O, red; N, blue.

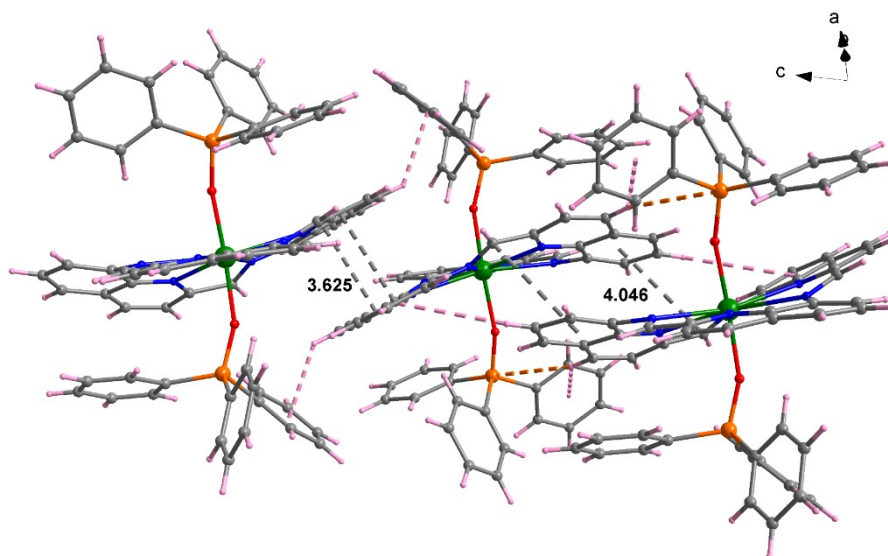

Figure S16. Intermolecular interactions (inferior to the sum of van der Waals radii) of **1**, viewed along the specific direction. Dy dark green; Si, orange; N blue; O red; C grey; H rose. Counter anions and lattice solvents are omitted for clarity. Short contacts are shown as dashed lines:  $\pi \cdots \pi$  grey; C-H $\cdots$ Si orange; C-H $\cdots$  $\pi$  rose.

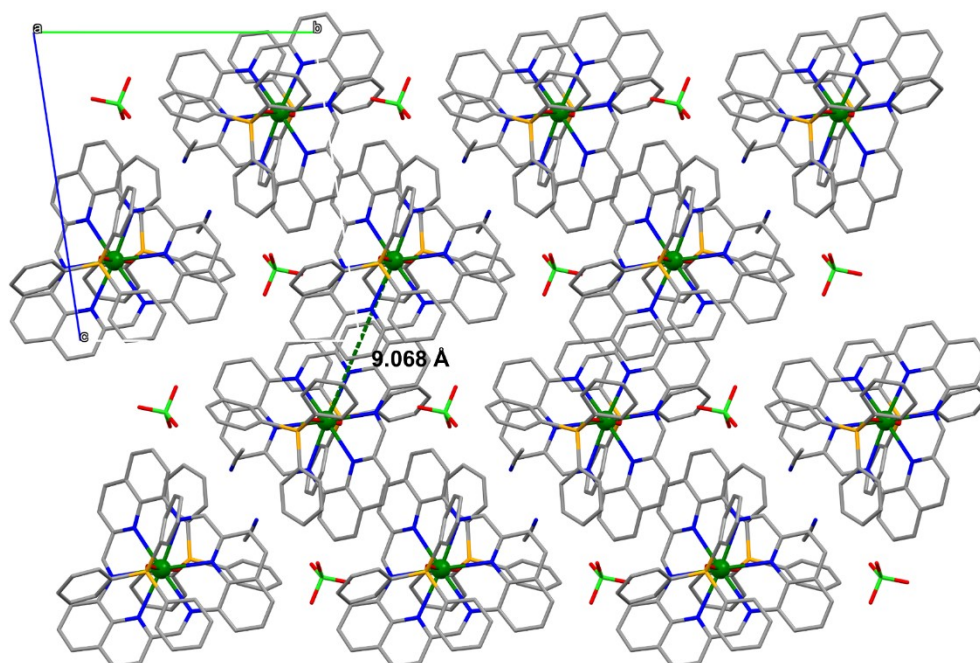

Figure S17. The crystal packing of **1** viewed along *a* axis with the shortest Dy $\cdots$ Dy distance of 9.068 Å. Hydrogen atoms are omitted for clarity. Dy dark green; Cl, bright green; Si, orange; N blue; O red; C grey.

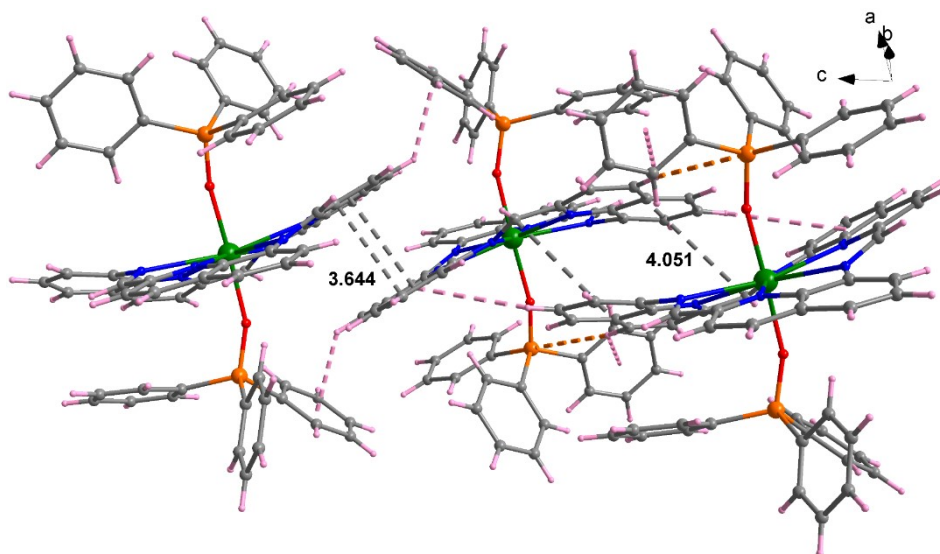

Figure S18. Intermolecular interactions (inferior to the sum of van der Waals radii) of **2**, viewed along the specific direction. Dy dark green; Si, orange; N blue; O red; C grey; H rose. Counter anions and lattice solvents are omitted for clarity. Short contacts are shown as dashed lines:  $\pi \cdots \pi$  grey; C-H $\cdots$ Si orange; C-H $\cdots$  $\pi$  rose.

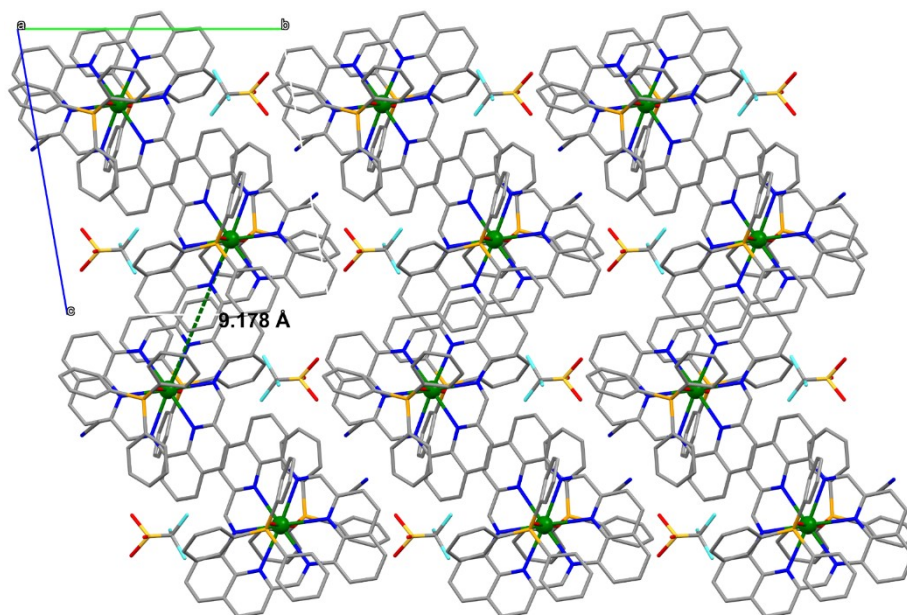

Figure S19. The crystal packing of **2** viewed along *a* axis with the shortest Dy $\cdots$ Dy distance of 9.178 Å. Hydrogen atoms are omitted for clarity. Dy, dark green; Si, orange; S, yellow; F, turquoise; O, red; N, blue; C, grey.

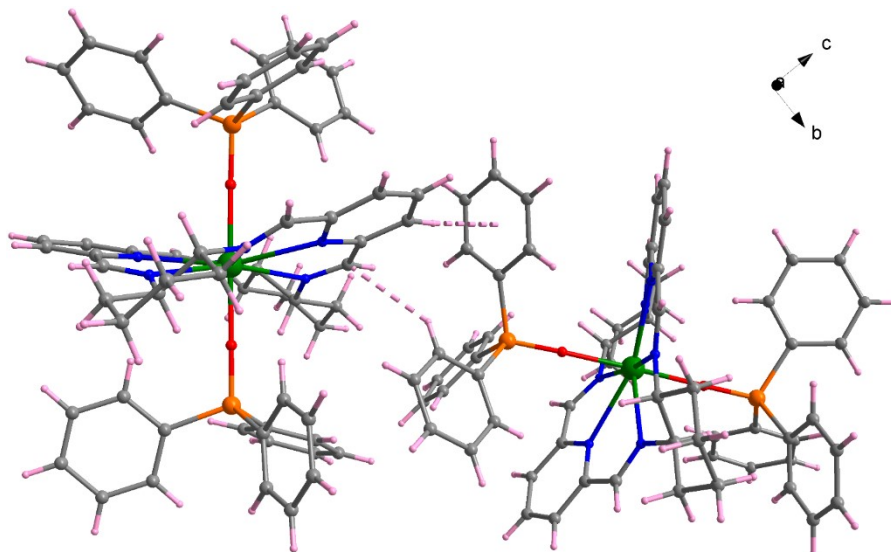

Figure S20. Intermolecular interactions (inferior to the sum of van der Waals radii) of **3R**, viewed along the specific direction. Dy, dark green; Si, orange; O, red; N, blue; C, grey; H rose. Counter anions and lattice solvents are omitted for clarity. Short contacts are shown as dashed lines: C-H $\cdots$  $\pi$  rose.

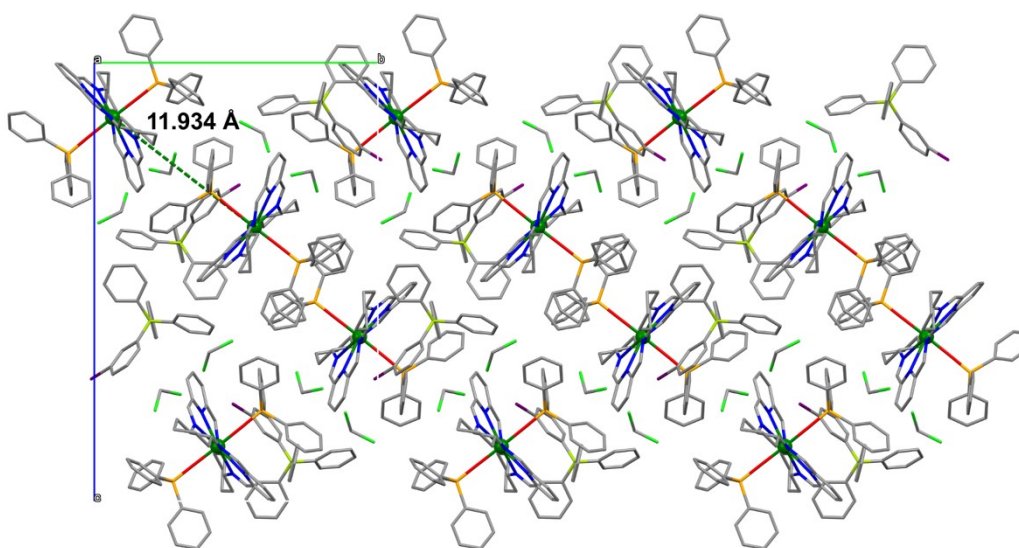

Figure S21. The crystal packing of **3R** viewed along *a* axis with the shortest Dy $\cdots$ Dy distance of 11.934 Å. Hydrogen atoms are omitted for clarity. Dy, dark green; Br, violet; Cl, bright green; Si, orange; O, red; N, blue; C, grey; B, lime.

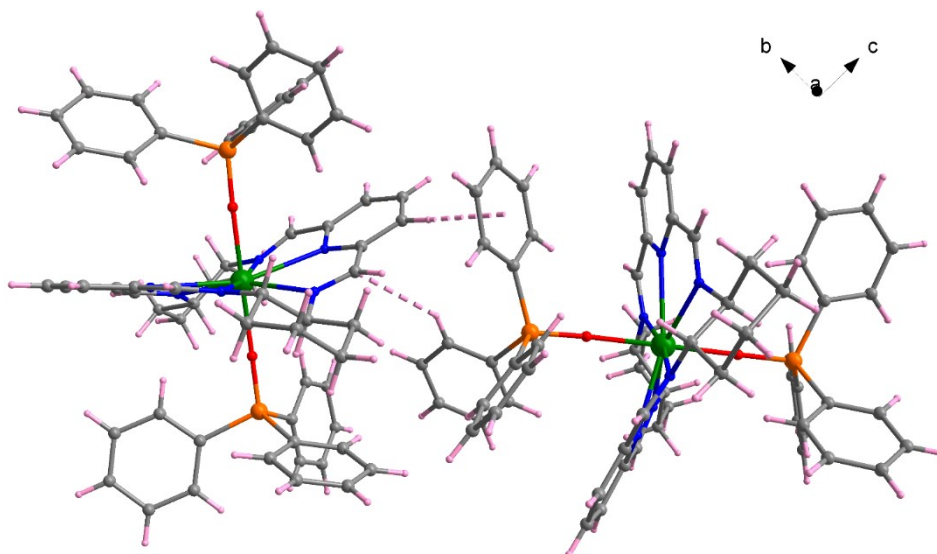

Figure S22. Intermolecular interactions (inferior to the sum of van der Waals radii) of **3S**, viewed along the specific direction. Dy, dark green; Si, orange; O, red; N, blue; C, grey; H rose. Counter anions and lattice solvents are omitted for clarity. Short contacts are shown as dashed lines: C-H $\cdots$  $\pi$  rose.

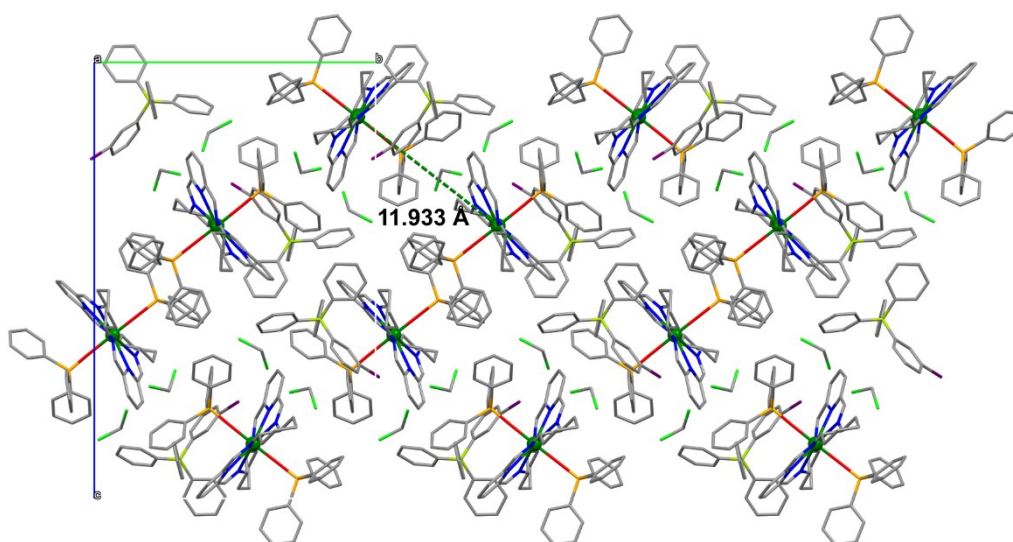

Figure S23. The crystal packing of **3S** viewed along  $a$  axis with the shortest Dy $\cdots$ Dy distance of 11.933 Å. Hydrogen atoms are omitted for clarity. Dy, dark green; Br, violet; Cl, bright green; Si, orange; O, red; N, blue; C, grey; B, lime.

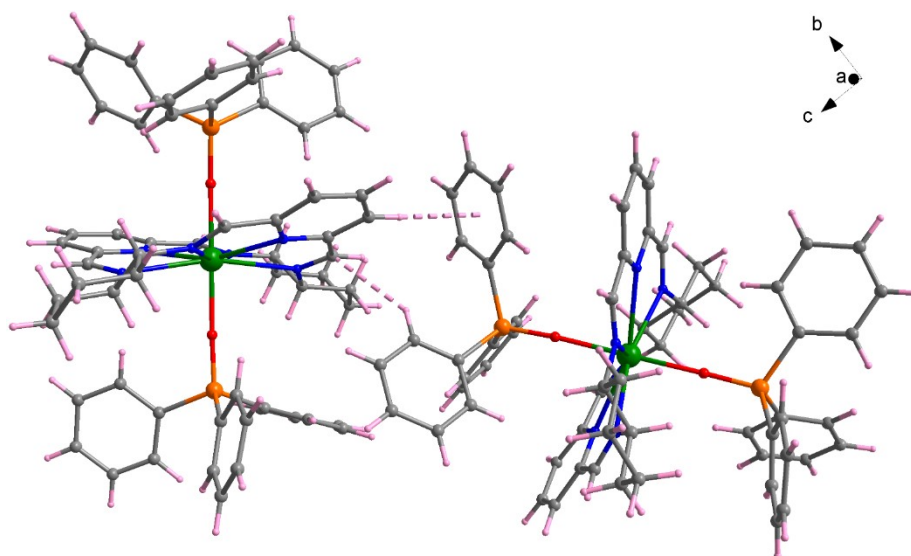

Figure S24. Intermolecular interactions (inferior to the sum of van der Waals radii) of **4R**, viewed along the specific direction. Dy, dark green; Si, orange; O, red; N, blue; C, grey; H rose. Counter anions and lattice solvents are omitted for clarity. Short contacts are shown as dashed lines: C-H $\cdots$  $\pi$  rose.

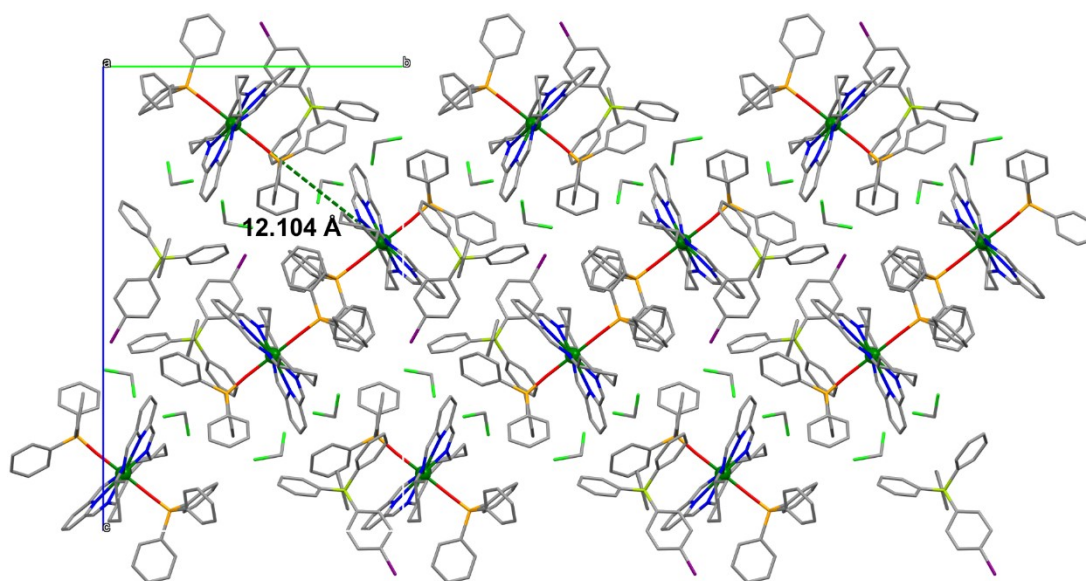

Figure S25. The crystal packing of **4R** viewed along *a* axis with the shortest Dy $\cdots$ Dy distance of 12.104 Å. Hydrogen atoms are omitted for clarity. Dy, dark green; Br, violet; Cl, bright green; Si, orange; O, red; N, blue; C, grey; B, lime.



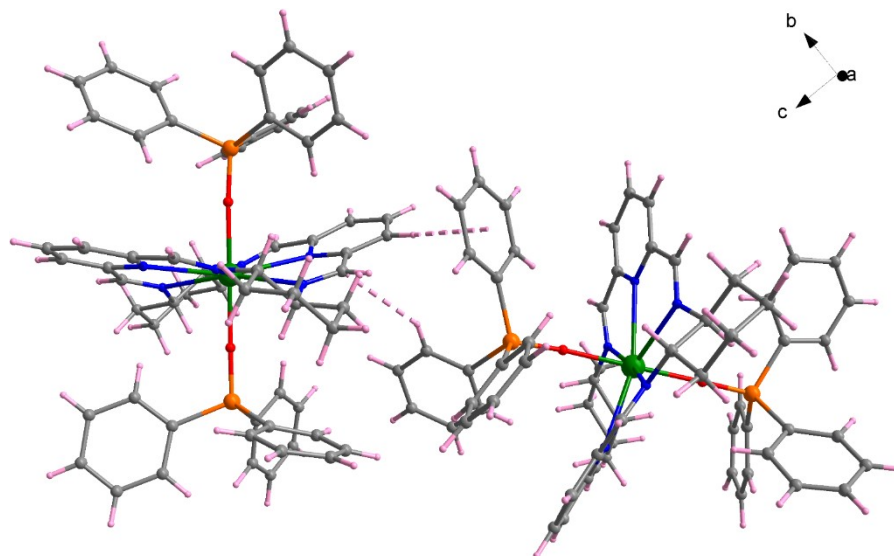

Figure S26. Intermolecular interactions (inferior to the sum of van der Waals radii) of **4S**, viewed along the specific direction. Dy, dark green; Si, orange; O, red; N, blue; C, grey; H rose. Counter anions and lattice solvents are omitted for clarity. Short contacts are shown as dashed lines: C-H $\cdots$  $\pi$  rose.

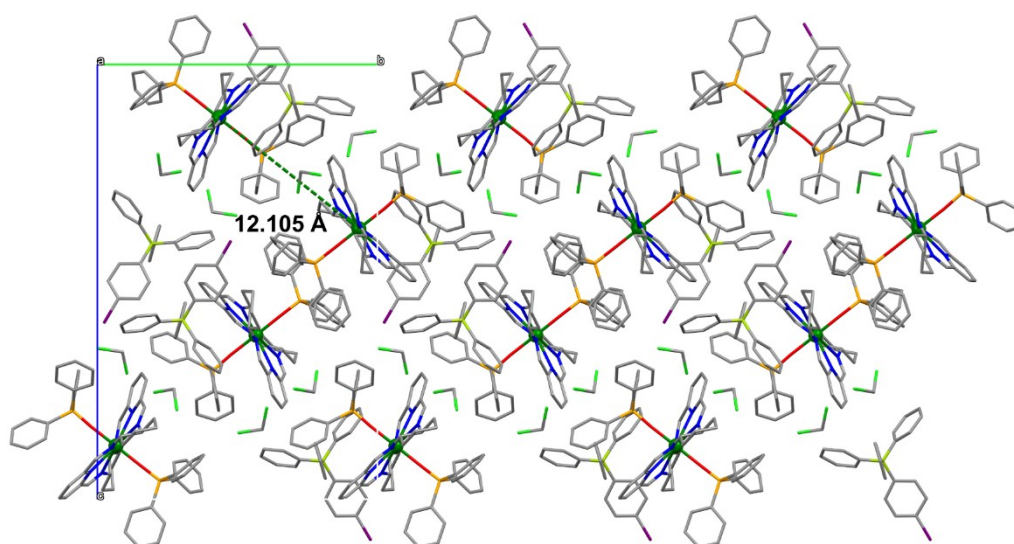

Figure S27. The crystal packing of **4S** viewed along  $a$  axis with the shortest Dy $\cdots$ Dy distance of 12.105 Å. Hydrogen atoms are omitted for clarity. Dy, dark green; Br, violet; Cl, bright green; Si, orange; O, red; N, blue; C, grey; B, lime.

#### IV. Magnetic characterization

Table S19 Relaxation fitting parameters for **1** obtained from CCFIT2.

| T / K | $\chi_S / \text{cm}^3 \text{mol}^{-1}$ | $\chi_T / \text{cm}^3 \text{mol}^{-1}$ | $\tau / \text{s}$ | $\alpha$ | Residual |
|-------|----------------------------------------|----------------------------------------|-------------------|----------|----------|
| 2     | 0.11906                                | 10.1427                                | 0.54772           | 0.30849  | 0.09537  |
| 3     | 0.10895                                | 6.75639                                | 0.44265           | 0.29417  | 0.07862  |
| 5     | 0.09675                                | 4.00675                                | 0.32393           | 0.2723   | 0.03249  |
| 7     | 0.08666                                | 2.84774                                | 0.25927           | 0.26308  | 0.01925  |
| 10    | 0.07329                                | 1.98996                                | 0.20575           | 0.26943  | 0.01302  |
| 15    | 0.07219                                | 1.33301                                | 0.14616           | 0.23648  | 0.01475  |
| 20    | 0.06333                                | 0.9756                                 | 0.09515           | 0.18212  | 0.01644  |
| 25    | 0.05994                                | 0.76791                                | 0.0633            | 0.1359   | 0.00904  |
| 30    | 0.05667                                | 0.63461                                | 0.04339           | 0.10603  | 0.00588  |
| 35    | 0.05077                                | 0.55202                                | 0.03167           | 0.09692  | 0.0027   |
| 40    | 0.04156                                | 0.48388                                | 0.02242           | 0.10274  | 0.0034   |
| 45    | 0.04927                                | 0.4209                                 | 0.01676           | 0.04866  | 9.36E-04 |
| 50    | 0.04379                                | 0.38284                                | 0.01265           | 0.05318  | 0.00101  |
| 55    | 0.0382                                 | 0.34571                                | 0.00958           | 0.04723  | 7.26E-04 |
| 60    | 0.03378                                | 0.31644                                | 0.00703           | 0.04337  | 7.66E-04 |
| 65    | 0.04072                                | 0.29102                                | 0.0053            | 0.03395  | 6.37E-04 |
| 70    | 0.03109                                | 0.27194                                | 0.004             | 0.03892  | 0.00111  |
| 75    | 0.02583                                | 0.25384                                | 0.00244           | 0.07466  | 0.00103  |
| 78    | 0.03021                                | 0.24575                                | 0.00186           | 0.06324  | 6.25E-04 |
| 81    | 0.03094                                | 0.23649                                | 0.00131           | 0.03598  | 5.28E-04 |
| 83    | 0.02964                                | 0.2284                                 | 9.63E-04          | 0.06067  | 4.44E-04 |
| 85    | 0.02536                                | 0.22413                                | 7.58E-04          | 0.03881  | 5.09E-04 |
| 86    | 0.04117                                | 0.21952                                | 6.92E-04          | 1.59E-06 | 4.15E-04 |
| 87    | 0.03647                                | 0.21887                                | 5.88E-04          | 1.78E-06 | 4.10E-04 |
| 88    | 0.0401                                 | 0.21304                                | 4.99E-04          | 2.31E-06 | 5.44E-04 |
| 89    | 0.04434                                | 0.21239                                | 4.29E-04          | 3.01E-06 | 8.30E-04 |
| 90    | 0.03321                                | 0.20756                                | 3.67E-04          | 5.16E-06 | 5.19E-04 |
| 91    | 0.05027                                | 0.20332                                | 3.24E-04          | 6.42E-06 | 6.40E-04 |
| 92    | 0.04911                                | 0.20513                                | 2.79E-04          | 6.35E-06 | 5.02E-04 |
| 93    | 0.04493                                | 0.20324                                | 2.38E-04          | 7.84E-06 | 0.00102  |
| 94    | 0.02939                                | 0.19949                                | 1.99E-04          | 1.06E-05 | 5.65E-04 |
| 95    | 0.03645                                | 0.19864                                | 1.62E-04          | 1.13E-05 | 2.58E-04 |
| 96    | 0.04252                                | 0.19482                                | 1.42E-04          | 1.55E-05 | 9.73E-04 |
| 97    | 0.04312                                | 0.19576                                | 1.19E-04          | 2.53E-05 | 5.23E-04 |
| 98    | 0.047                                  | 0.19353                                | 9.91E-05          | 2.99E-05 | 5.65E-04 |
| 99    | 6.46E-16                               | 0.19405                                | 8.19E-05          | 0.10885  | 4.17E-04 |

Table S20 Relaxation fitting parameters for **2** obtained from CCFIT2.

| T / K | $\chi_S / \text{cm}^3 \text{mol}^{-1}$ | $\chi_T / \text{cm}^3 \text{mol}^{-1}$ | $\tau / \text{s}$ | $\alpha$ | Residual |
|-------|----------------------------------------|----------------------------------------|-------------------|----------|----------|
| 2     | 0.04132                                | 11.6023                                | 3.72437           | 0.40536  | 0.00191  |
| 3     | 0.04598                                | 7.60047                                | 2.69417           | 0.39036  | 0.00299  |
| 5     | 0.03937                                | 4.327                                  | 1.52678           | 0.36951  | 0.00112  |
| 7     | 0.0341                                 | 3.12381                                | 1.16424           | 0.37865  | 0.00163  |
| 10    | 0.03669                                | 2.22918                                | 0.86632           | 0.37315  | 0.00437  |
| 15    | 0.04748                                | 1.3896                                 | 0.42352           | 0.28598  | 0.01301  |
| 20    | 0.05091                                | 0.97318                                | 0.22078           | 0.18464  | 0.00971  |
| 25    | 0.04941                                | 0.75248                                | 0.13083           | 0.12131  | 0.00538  |
| 30    | 0.04594                                | 0.62802                                | 0.08321           | 0.11067  | 0.00507  |
| 35    | 0.03867                                | 0.54288                                | 0.05564           | 0.08408  | 0.00208  |
| 40    | 0.03586                                | 0.47158                                | 0.03679           | 0.0703   | 0.00113  |
| 45    | 0.0346                                 | 0.41687                                | 0.02512           | 0.05102  | 4.44E-04 |
| 50    | 0.03189                                | 0.37364                                | 0.01759           | 0.04213  | 2.28E-04 |
| 55    | 0.03065                                | 0.3396                                 | 0.01233           | 0.0392   | 2.56E-04 |
| 60    | 0.02647                                | 0.31345                                | 0.00827           | 0.05706  | 8.56E-04 |
| 65    | 0.02833                                | 0.28618                                | 0.00548           | 0.02436  | 5.05E-04 |
| 70    | 0.02453                                | 0.26632                                | 0.00312           | 0.04867  | 2.18E-04 |
| 75    | 0.02568                                | 0.24789                                | 0.00162           | 0.02967  | 4.68E-04 |
| 78    | 0.02171                                | 0.23842                                | 9.92E-04          | 0.05019  | 2.73E-04 |
| 81    | 0.01817                                | 0.23013                                | 5.75E-04          | 0.07413  | 1.93E-04 |
| 83    | 0.01292                                | 0.22465                                | 4.10E-04          | 0.08528  | 4.68E-04 |
| 85    | 0.02011                                | 0.21862                                | 3.08E-04          | 0.06286  | 2.64E-04 |
| 86    | 0.02356                                | 0.21535                                | 2.64E-04          | 0.05759  | 4.12E-04 |
| 87    | 0.00968                                | 0.21373                                | 2.01E-04          | 0.08479  | 2.96E-04 |
| 88    | 0.00593                                | 0.21121                                | 1.79E-04          | 0.07008  | 2.74E-04 |
| 89    | 0.03278                                | 0.2063                                 | 1.59E-04          | 9.86E-16 | 2.54E-04 |
| 90    | 0.04046                                | 0.20511                                | 1.44E-04          | 1.36E-15 | 3.58E-04 |
| 91    | 0.05526                                | 0.20293                                | 1.30E-04          | 1.67E-15 | 1.74E-04 |
| 92    | 0.04095                                | 0.20115                                | 1.06E-04          | 1.91E-15 | 2.74E-04 |
| 93    | 0.05219                                | 0.19965                                | 9.08E-05          | 2.41E-15 | 1.85E-04 |
| 94    | 0.01908                                | 0.19669                                | 7.28E-05          | 1.83E-15 | 1.95E-04 |
| 95    | 0.0499                                 | 0.19421                                | 6.09E-05          | 2.02E-15 | 1.79E-04 |
| 96    | 0.05967                                | 0.19222                                | 5.19E-05          | 2.56E-15 | 1.97E-04 |
| 97    | 0.06085                                | 0.19015                                | 4.34E-05          | 3.05E-15 | 1.66E-04 |
| 98    | 0.08038                                | 0.18833                                | 3.67E-05          | 4.27E-15 | 3.16E-04 |
| 99    | 2.66E-16                               | 0.18883                                | 3.06E-05          | 3.49E-15 | 1.91E-04 |

Table S21 Relaxation fitting parameters for **3R** obtained from CCFIT2.

| T / K | $\chi_S / \text{cm}^3 \text{mol}^{-1}$ | $\chi_T / \text{cm}^3 \text{mol}^{-1}$ | $\tau / \text{s}$ | $\alpha$ | Residual |
|-------|----------------------------------------|----------------------------------------|-------------------|----------|----------|
| 2     | 0.04006                                | 7.01892                                | 0.03639           | 0.29128  | 0.00609  |
| 3     | 0.03526                                | 4.7305                                 | 0.03381           | 0.27512  | 0.00503  |
| 4     | 0.03178                                | 3.55757                                | 0.0315            | 0.26133  | 0.00448  |
| 5     | 0.02917                                | 2.85748                                | 0.02954           | 0.24714  | 0.00451  |
| 6     | 0.02838                                | 2.38015                                | 0.02764           | 0.2337   | 0.00487  |
| 7     | 0.02531                                | 2.03341                                | 0.02557           | 0.21985  | 0.00447  |
| 8     | 0.02474                                | 1.77179                                | 0.02349           | 0.20567  | 0.00398  |
| 10    | 0.02185                                | 1.40565                                | 0.01943           | 0.18167  | 0.00343  |
| 12    | 0.02023                                | 1.16497                                | 0.01587           | 0.15988  | 0.00249  |
| 14    | 0.01841                                | 0.99224                                | 0.01291           | 0.14239  | 0.00173  |
| 16    | 0.01846                                | 0.86622                                | 0.01065           | 0.12779  | 0.00127  |
| 19    | 0.01423                                | 0.72629                                | 0.0081            | 0.11618  | 7.34E-04 |
| 22    | 0.01411                                | 0.62562                                | 0.00643           | 0.10749  | 5.94E-04 |
| 25    | 0.01408                                | 0.54864                                | 0.00525           | 0.09693  | 4.39E-04 |
| 28    | 0.01307                                | 0.48815                                | 0.00436           | 0.08714  | 4.26E-04 |
| 31    | 0.0126                                 | 0.4414                                 | 0.00369           | 0.08807  | 5.43E-04 |
| 34    | 0.01171                                | 0.40201                                | 0.00311           | 0.08074  | 2.01E-04 |
| 37    | 0.01291                                | 0.36941                                | 0.00269           | 0.07305  | 8.71E-05 |
| 40    | 0.0101                                 | 0.34232                                | 0.00229           | 0.07184  | 1.49E-04 |
| 43    | 0.0086                                 | 0.31846                                | 0.00197           | 0.07234  | 1.15E-04 |
| 46    | 0.01007                                | 0.29789                                | 0.00173           | 0.0598   | 1.25E-04 |
| 49    | 0.0084                                 | 0.27993                                | 0.00151           | 0.0604   | 1.11E-04 |
| 52    | 0.0062                                 | 0.26456                                | 0.00128           | 0.07077  | 2.32E-04 |
| 55    | 0.00819                                | 0.24988                                | 0.00112           | 0.0641   | 1.33E-04 |
| 58    | 0.00771                                | 0.23708                                | 9.43E-04          | 0.06176  | 8.84E-05 |
| 61    | 0.01075                                | 0.22566                                | 8.07E-04          | 0.04783  | 1.04E-04 |
| 62    | 0.01019                                | 0.22153                                | 7.43E-04          | 0.05011  | 1.64E-04 |
| 63    | 0.00387                                | 0.2187                                 | 6.55E-04          | 0.07946  | 1.73E-04 |
| 64    | 0.00368                                | 0.2155                                 | 6.16E-04          | 0.06854  | 1.74E-04 |
| 65    | 0.00595                                | 0.21153                                | 5.79E-04          | 0.0575   | 9.12E-05 |
| 66    | 0.01133                                | 0.20885                                | 5.46E-04          | 0.04864  | 1.22E-04 |
| 67    | 8.22E-04                               | 0.20557                                | 4.64E-04          | 0.08005  | 9.51E-05 |
| 68    | 0.00635                                | 0.20194                                | 4.30E-04          | 0.06298  | 8.87E-05 |
| 69    | 0.0039                                 | 0.19885                                | 3.79E-04          | 0.07005  | 9.35E-05 |
| 70    | 0.00106                                | 0.19504                                | 3.39E-04          | 0.06756  | 1.10E-04 |
| 71    | 1.01E-08                               | 0.19206                                | 2.97E-04          | 0.09006  | 1.24E-04 |
| 72    | 1.43E-08                               | 0.18959                                | 2.68E-04          | 0.08181  | 8.84E-05 |
| 73    | 1.83E-08                               | 0.18638                                | 2.38E-04          | 0.08915  | 1.33E-04 |
| 74    | 2.59E-08                               | 0.18405                                | 2.08E-04          | 0.09213  | 2.44E-04 |
| 75    | 3.79E-08                               | 0.18183                                | 1.73E-04          | 0.1026   | 1.82E-04 |
| 76    | 5.92E-08                               | 0.17875                                | 1.51E-04          | 0.09183  | 8.24E-05 |

|    |          |         |          |         |          |
|----|----------|---------|----------|---------|----------|
| 77 | 8.69E-08 | 0.17667 | 1.31E-04 | 0.1035  | 2.49E-04 |
| 78 | 1.39E-07 | 0.17449 | 1.09E-04 | 0.09818 | 1.24E-04 |
| 79 | 2.01E-07 | 0.1722  | 9.61E-05 | 0.09928 | 6.41E-05 |
| 80 | 2.62E-07 | 0.16998 | 8.29E-05 | 0.11935 | 1.80E-04 |
| 81 | 4.28E-07 | 0.16668 | 6.74E-05 | 0.046   | 1.78E-04 |
| 82 | 5.07E-07 | 0.16556 | 5.51E-05 | 0.07479 | 1.09E-04 |
| 83 | 7.06E-07 | 0.16419 | 4.45E-05 | 0.05812 | 1.04E-04 |

Table S22 Relaxation fitting parameters for **3S** obtained from CCFIT2.

| T / K | $\chi_S / \text{cm}^3 \text{mol}^{-1}$ | $\chi_T / \text{cm}^3 \text{mol}^{-1}$ | $\tau / \text{s}$ | $\alpha$ | Residual |
|-------|----------------------------------------|----------------------------------------|-------------------|----------|----------|
| 2     | 0.04749                                | 7.50694                                | 0.09394           | 0.22202  | 0.01295  |
| 3     | 0.03809                                | 4.954                                  | 0.07704           | 0.19088  | 0.00858  |
| 5     | 3.94E-17                               | 2.94334                                | 0.059             | 0.18658  | 0.01167  |
| 8     | 8.66E-17                               | 1.80259                                | 0.04338           | 0.15696  | 0.00259  |
| 11    | 1.15E-16                               | 1.30862                                | 0.03365           | 0.15149  | 0.00268  |
| 16    | 1.37E-16                               | 0.89137                                | 0.02214           | 0.12223  | 0.00177  |
| 21    | 2.96E-16                               | 0.67481                                | 0.01541           | 0.09974  | 0.0019   |
| 26    | 4.74E-16                               | 0.54155                                | 0.01131           | 0.08455  | 0.00134  |
| 31    | 7.40E-16                               | 0.45361                                | 0.00852           | 0.07469  | 0.00125  |
| 36    | 1.33E-15                               | 0.3925                                 | 0.00662           | 0.06835  | 0.00163  |
| 41    | 1.56E-15                               | 0.34108                                | 0.00511           | 0.05553  | 8.25E-04 |
| 46    | 3.90E-15                               | 0.30623                                | 0.00406           | 0.0526   | 0.00119  |
| 51    | 9.31E-15                               | 0.27581                                | 0.00324           | 0.04418  | 6.94E-04 |
| 56    | 1.26E-14                               | 0.24966                                | 0.00253           | 0.03489  | 3.67E-04 |
| 61    | 1.20E-14                               | 0.22992                                | 0.00196           | 0.04496  | 4.82E-04 |
| 66    | 1.08E-14                               | 0.21403                                | 0.00134           | 0.05246  | 8.32E-04 |
| 70    | 1.46E-14                               | 0.19964                                | 9.44E-04          | 0.03383  | 4.14E-04 |
| 73    | 1.90E-14                               | 0.19187                                | 6.89E-04          | 0.03765  | 2.47E-04 |
| 76    | 1.42E-14                               | 0.1842                                 | 4.72E-04          | 0.03067  | 8.70E-04 |
| 78    | 1.62E-14                               | 0.1816                                 | 3.55E-04          | 0.05062  | 4.89E-04 |
| 80    | 2.64E-14                               | 0.17492                                | 2.62E-04          | 0.01523  | 2.01E-04 |
| 81    | 7.26E-14                               | 0.17384                                | 2.25E-04          | 0.05586  | 7.48E-04 |
| 82    | 1.34E-13                               | 0.1696                                 | 1.98E-04          | 0.00769  | 3.26E-04 |
| 83    | 6.55E-14                               | 0.16774                                | 1.61E-04          | 0.01521  | 1.45E-04 |
| 84    | 1.13E-13                               | 0.16455                                | 1.40E-04          | 0.00153  | 6.58E-04 |
| 85    | 3.16E-12                               | 0.16388                                | 1.18E-04          | 0.08319  | 5.82E-04 |
| 86    | 4.30E-12                               | 0.16305                                | 9.88E-05          | 0.05435  | 8.38E-04 |
| 87    | 5.85E-12                               | 0.16233                                | 8.26E-05          | 0.05169  | 0.00101  |
| 88    | 1.09E-11                               | 0.15846                                | 6.92E-05          | 6.39E-16 | 4.14E-04 |
| 89    | 1.56E-11                               | 0.15536                                | 5.73E-05          | 8.14E-16 | 8.30E-04 |
| 90    | 2.07E-11                               | 0.15619                                | 4.81E-05          | 8.32E-16 | 4.74E-04 |

Table S23 Relaxation fitting parameters for **4R** obtained from CCFIT2.

| T / K | $\chi_s / \text{cm}^3 \text{mol}^{-1}$ | $\chi_T / \text{cm}^3 \text{mol}^{-1}$ | $\tau / \text{s}$ | $\alpha$ | Residual |
|-------|----------------------------------------|----------------------------------------|-------------------|----------|----------|
| 2     | 0.03929                                | 7.14749                                | 0.07467           | 0.27297  | 0.00929  |
| 3     | 0.02871                                | 4.8198                                 | 0.06954           | 0.26085  | 0.0057   |
| 5     | 0.02294                                | 2.93617                                | 0.05943           | 0.2342   | 0.00411  |
| 8     | 0.01652                                | 1.81431                                | 0.04282           | 0.19024  | 0.00437  |
| 11    | 0.01817                                | 1.29706                                | 0.03001           | 0.15139  | 0.0042   |
| 16    | 0.01587                                | 0.87905                                | 0.01733           | 0.11463  | 0.00178  |
| 21    | 0.01208                                | 0.66564                                | 0.01112           | 0.09423  | 0.00155  |
| 26    | 0.01341                                | 0.53148                                | 0.00777           | 0.0728   | 8.75E-04 |
| 31    | 0.01208                                | 0.44463                                | 0.00572           | 0.06676  | 8.81E-04 |
| 36    | 0.01489                                | 0.383                                  | 0.00433           | 0.05105  | 2.88E-04 |
| 41    | 0.01317                                | 0.33497                                | 0.00331           | 0.03594  | 1.98E-04 |
| 46    | 0.00888                                | 0.29954                                | 0.00254           | 0.04781  | 6.12E-04 |
| 51    | 0.01034                                | 0.27108                                | 0.002             | 0.03314  | 2.64E-04 |
| 56    | 0.01053                                | 0.24534                                | 0.00156           | 0.02949  | 3.61E-04 |
| 61    | 0.00522                                | 0.22672                                | 0.00115           | 0.05172  | 3.48E-04 |
| 66    | 0.00699                                | 0.21112                                | 8.23E-04          | 0.02762  | 6.33E-04 |
| 70    | 0.01274                                | 0.19933                                | 6.00E-04          | 0.02663  | 3.55E-04 |
| 73    | 0.01708                                | 0.18779                                | 4.47E-04          | 0.03178  | 0.00101  |
| 76    | 0.00708                                | 0.18014                                | 2.97E-04          | 0.02803  | 3.79E-04 |
| 78    | 3.48E-11                               | 0.17855                                | 2.09E-04          | 0.06377  | 8.68E-04 |
| 80    | 4.55E-11                               | 0.17361                                | 1.56E-04          | 0.06619  | 1.77E-04 |
| 81    | 6.18E-11                               | 0.17047                                | 1.27E-04          | 0.06871  | 4.78E-04 |
| 82    | 1.11E-10                               | 0.16661                                | 1.12E-04          | 0.00969  | 0.00198  |
| 83    | 5.63E-12                               | 0.16612                                | 9.67E-05          | 0.04992  | 1.60E-04 |
| 84    | 9.51E-12                               | 0.16467                                | 8.20E-05          | 0.02041  | 7.39E-04 |
| 85    | 3.03E-12                               | 0.1641                                 | 6.96E-05          | 0.10632  | 3.07E-04 |
| 86    | 7.19E-12                               | 0.15967                                | 5.83E-05          | 1.17E-15 | 5.05E-04 |
| 87    | 9.32E-12                               | 0.15801                                | 4.84E-05          | 1.60E-15 | 4.23E-04 |
| 88    | 1.34E-11                               | 0.15702                                | 4.00E-05          | 1.92E-15 | 2.62E-04 |

Table S24 Relaxation fitting parameters for 4S obtained from CCFIT2.

| T / K | $\chi_S / \text{cm}^3 \text{mol}^{-1}$ | $\chi_T / \text{cm}^3 \text{mol}^{-1}$ | $\tau / \text{s}$ | $\alpha$ | Residual |
|-------|----------------------------------------|----------------------------------------|-------------------|----------|----------|
| 2     | 0.02442                                | 7.46328                                | 0.05542           | 0.29769  | 0.00927  |
| 3     | 0.02389                                | 5.03338                                | 0.05182           | 0.28574  | 0.00536  |
| 5     | 0.01995                                | 3.04253                                | 0.04371           | 0.2552   | 0.00572  |
| 8     | 0.01958                                | 1.89571                                | 0.0325            | 0.21993  | 0.00535  |
| 11    | 0.01565                                | 1.35996                                | 0.02304           | 0.18851  | 0.00424  |
| 16    | 0.0167                                 | 0.92409                                | 0.01374           | 0.14778  | 0.00305  |
| 21    | 0.01893                                | 0.69346                                | 0.00903           | 0.11564  | 0.00178  |
| 26    | 0.0095                                 | 0.56274                                | 0.00627           | 0.12336  | 0.00222  |
| 31    | 0.01398                                | 0.46682                                | 0.00469           | 0.10276  | 9.53E-04 |
| 36    | 0.01915                                | 0.39984                                | 0.00362           | 0.06857  | 0.00193  |
| 41    | 0.01361                                | 0.35276                                | 0.00271           | 0.08702  | 0.00109  |
| 46    | 0.01656                                | 0.31343                                | 0.00215           | 0.05279  | 0.00202  |
| 51    | 0.00892                                | 0.28463                                | 0.00166           | 0.08648  | 4.65E-04 |
| 56    | 0.01735                                | 0.25719                                | 0.00134           | 0.05377  | 6.29E-04 |
| 61    | 0.00701                                | 0.238                                  | 9.72E-04          | 0.07253  | 3.12E-04 |
| 66    | 0.01081                                | 0.22153                                | 7.05E-04          | 0.07627  | 0.00105  |
| 70    | 0.0062                                 | 0.19755                                | 4.33E-04          | 0.09825  | 0.01356  |
| 73    | 0.00347                                | 0.19832                                | 3.36E-04          | 0.06606  | 8.47E-04 |
| 76    | 0.01929                                | 0.1904                                 | 2.64E-04          | 0.07995  | 0.0011   |
| 78    | 0.00473                                | 0.18435                                | 2.05E-04          | 0.11779  | 0.00191  |
| 80    | 0.04275                                | 0.18029                                | 1.75E-04          | 0.00183  | 5.63E-04 |
| 81    | 0.03401                                | 0.16962                                | 1.61E-04          | 1.36E-14 | 0.0149   |
| 82    | 0.05455                                | 0.17554                                | 1.45E-04          | 7.05E-15 | 7.97E-04 |
| 83    | 0.05577                                | 0.17356                                | 1.35E-04          | 6.55E-15 | 0.00156  |
| 84    | 0.02722                                | 0.1725                                 | 1.21E-04          | 9.06E-15 | 8.62E-04 |
| 85    | 0.06844                                | 0.16957                                | 1.07E-04          | 7.92E-15 | 5.71E-04 |
| 86    | 0.07362                                | 0.16807                                | 8.91E-05          | 1.02E-14 | 4.99E-04 |
| 87    | 0.07659                                | 0.16485                                | 7.29E-05          | 1.73E-14 | 6.96E-04 |
| 88    | 0.06259                                | 0.16521                                | 6.03E-05          | 2.29E-14 | 4.63E-04 |



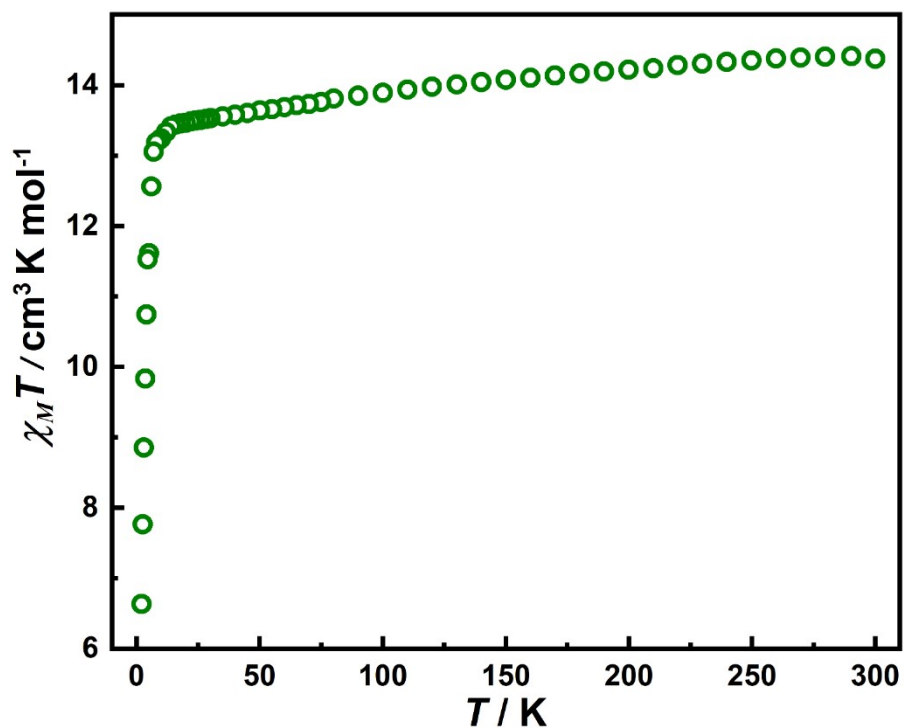

Figure S28. Temperature dependence of the  $\chi_M T$  values for **1** performed with a 1000 Oe applied field in the temperature range 2 to 300 K.

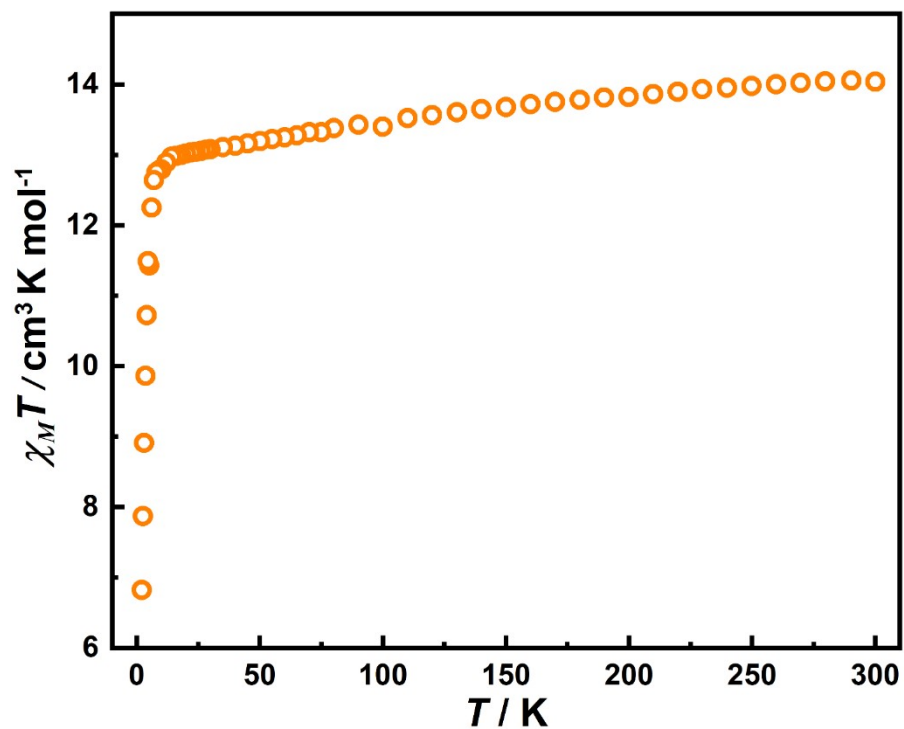

Figure S29. Temperature dependence of the  $\chi_M T$  values for **2** performed with a 1000 Oe applied field in the temperature range 2 to 300 K.

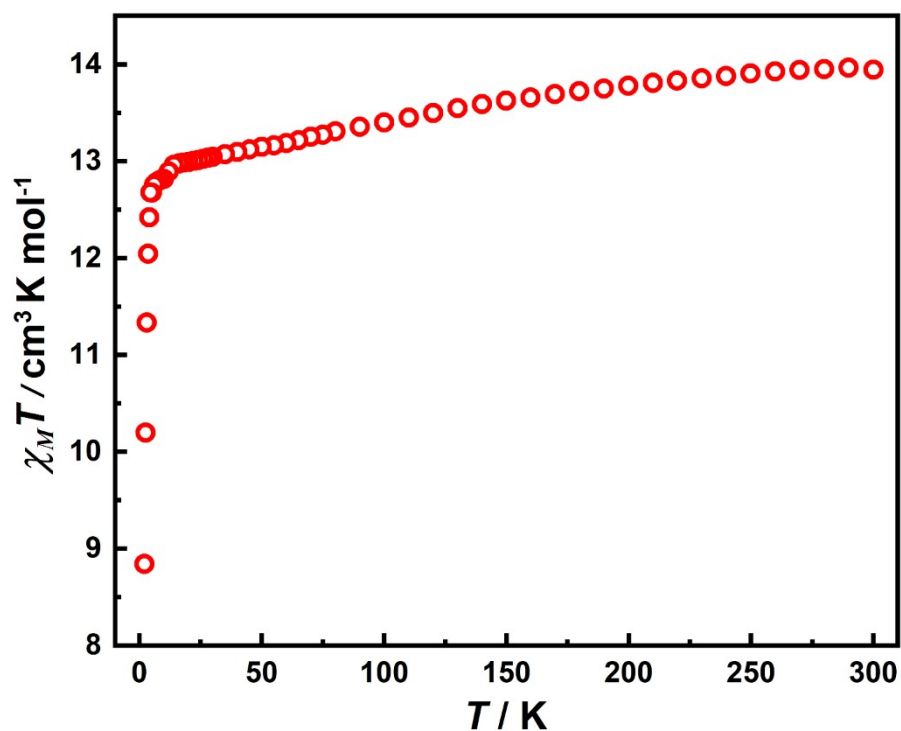

Figure S30. Temperature dependence of the  $\chi_M T$  values for **3R** performed with a 1000 Oe applied field in the temperature range 2 to 300 K.

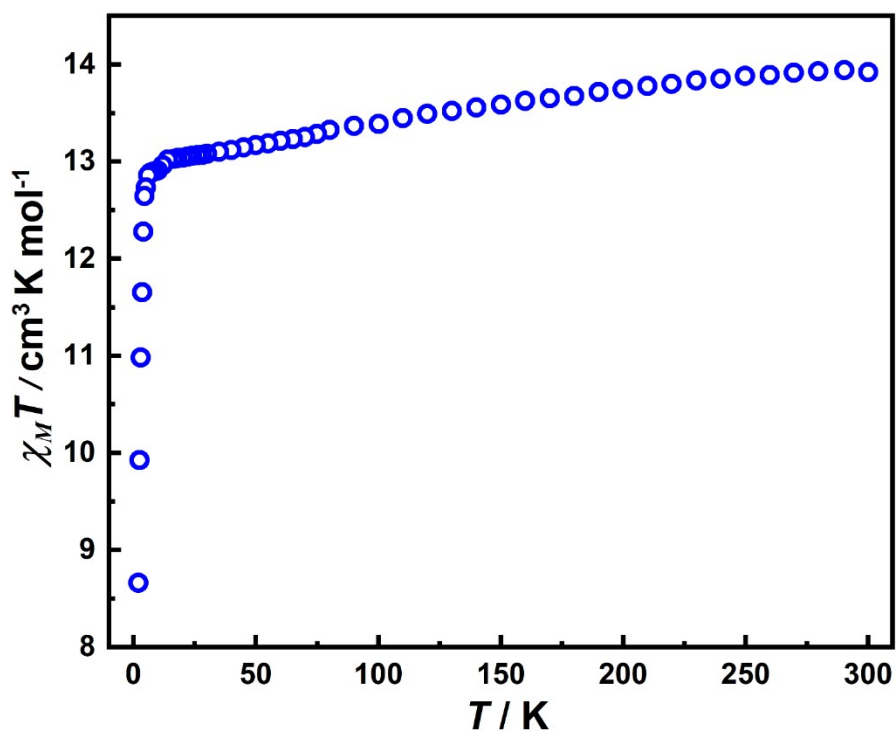

Figure S31. Temperature dependence of the  $\chi_M T$  values for **3S** performed with a 1000 Oe applied field in the temperature range 2 to 300 K.

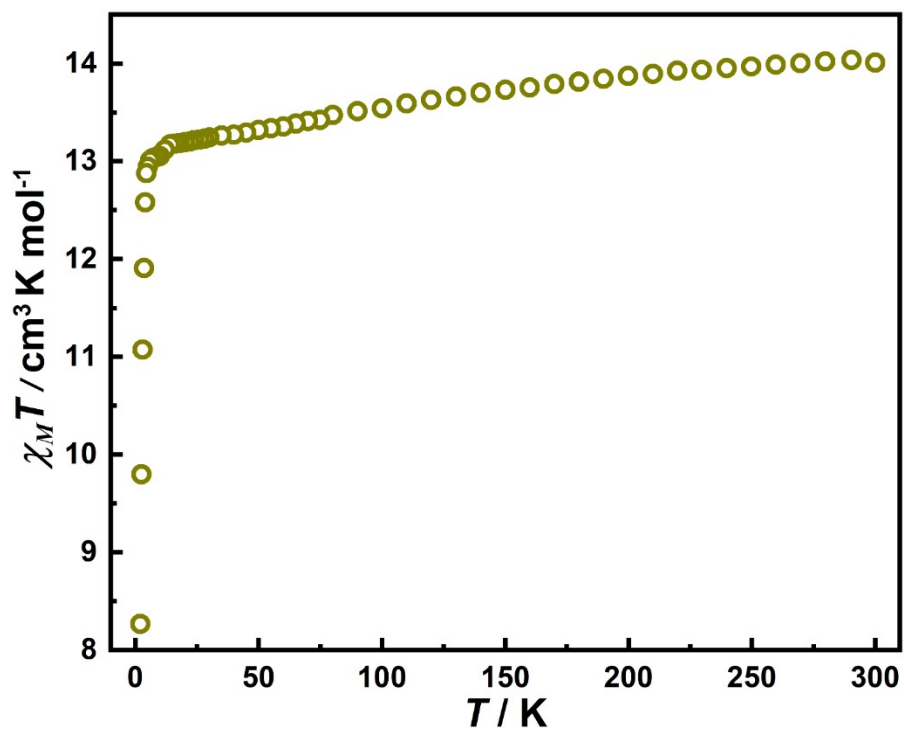

Figure S32. Temperature dependence of the  $\chi_M T$  values for **4R** performed with a 1000 Oe applied field in the temperature range 2 to 300 K.

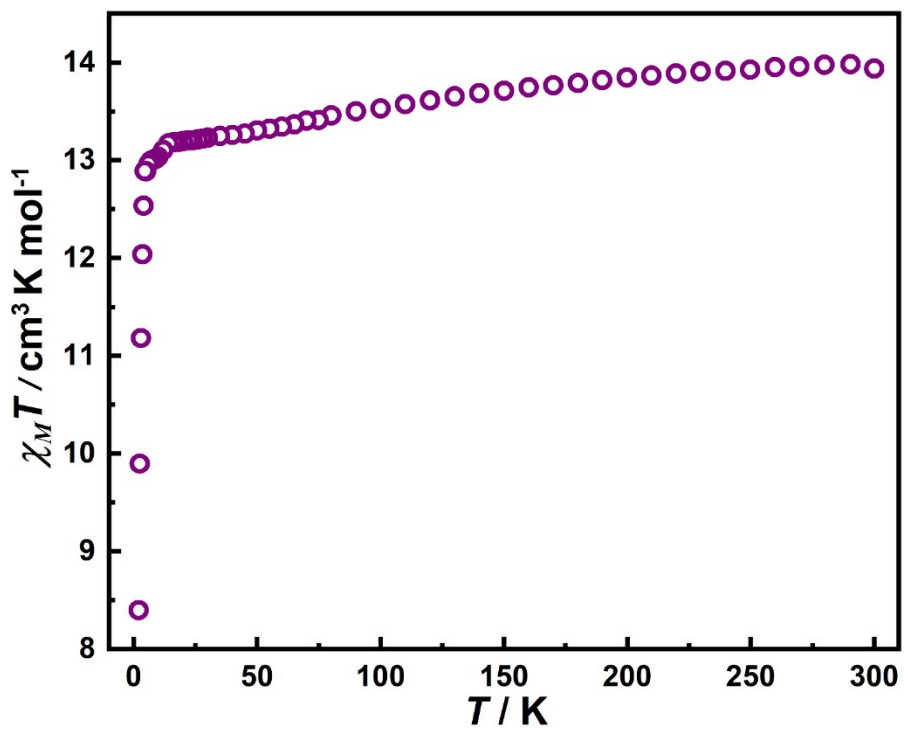

Figure S33. Temperature dependence of the  $\chi_M T$  values for **4S** performed with a 1000 Oe applied field in the temperature range 2 to 300 K.

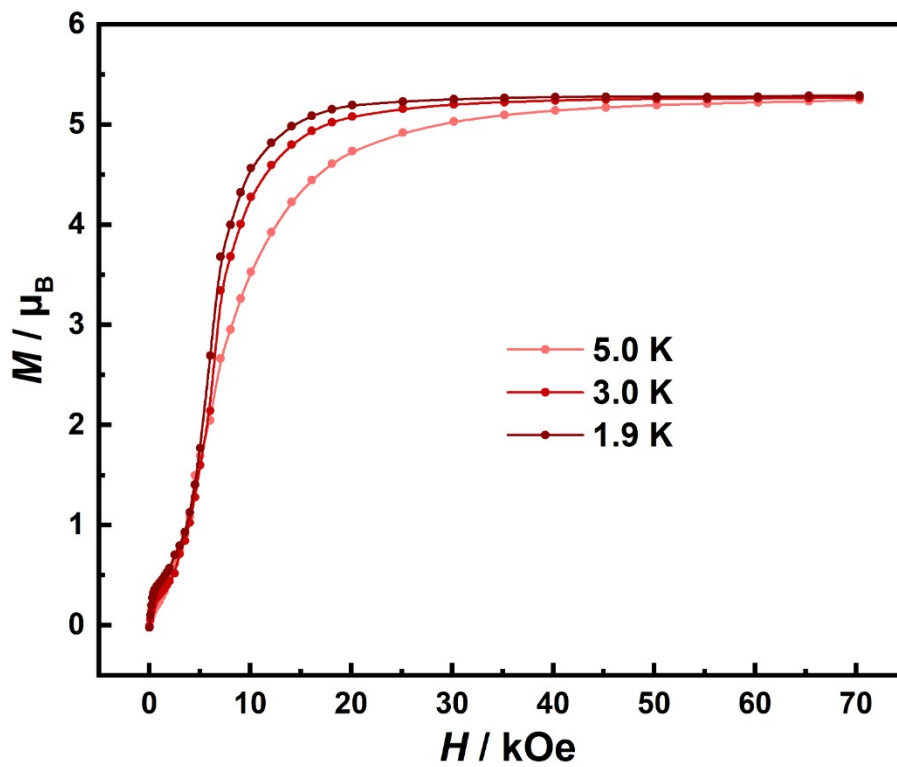

Figure S34. Field dependence of the magnetization at 1.9, 3 and 5 K for 1.

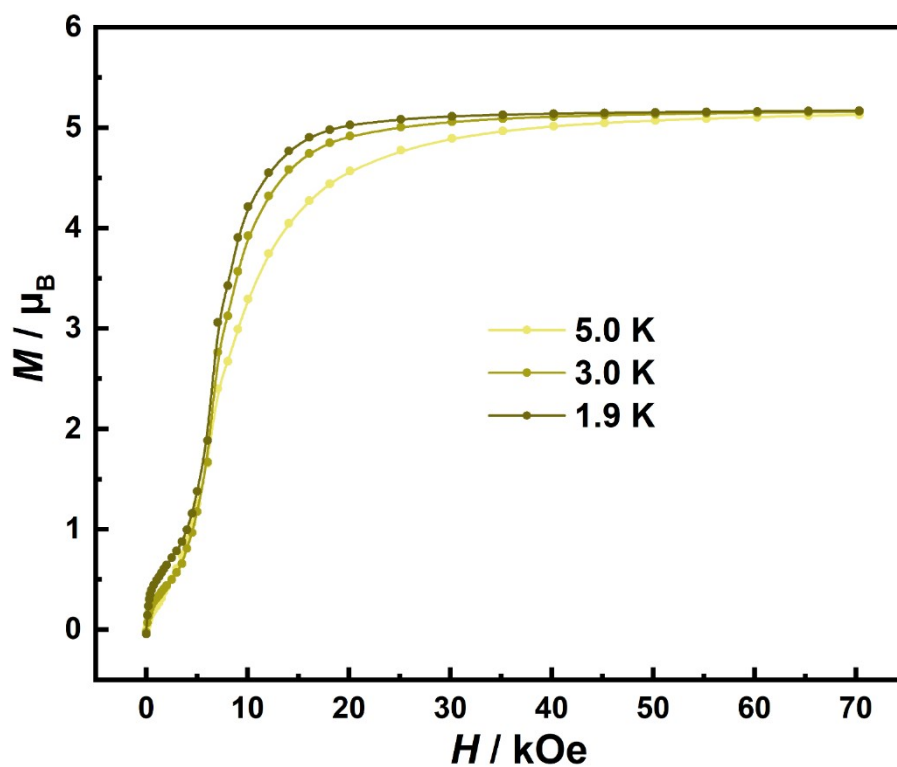

Figure S35. Field dependence of the magnetization at 1.9, 3 and 5 K for 2.

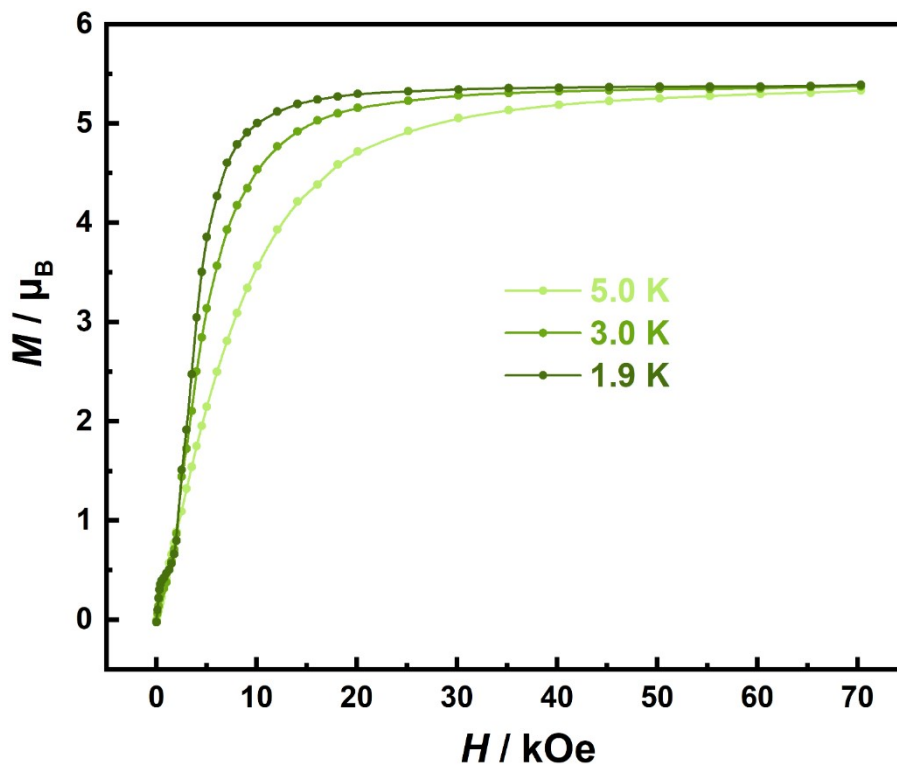

Figure S36. Field dependence of the magnetization at 1.9, 3 and 5 K for 3R.

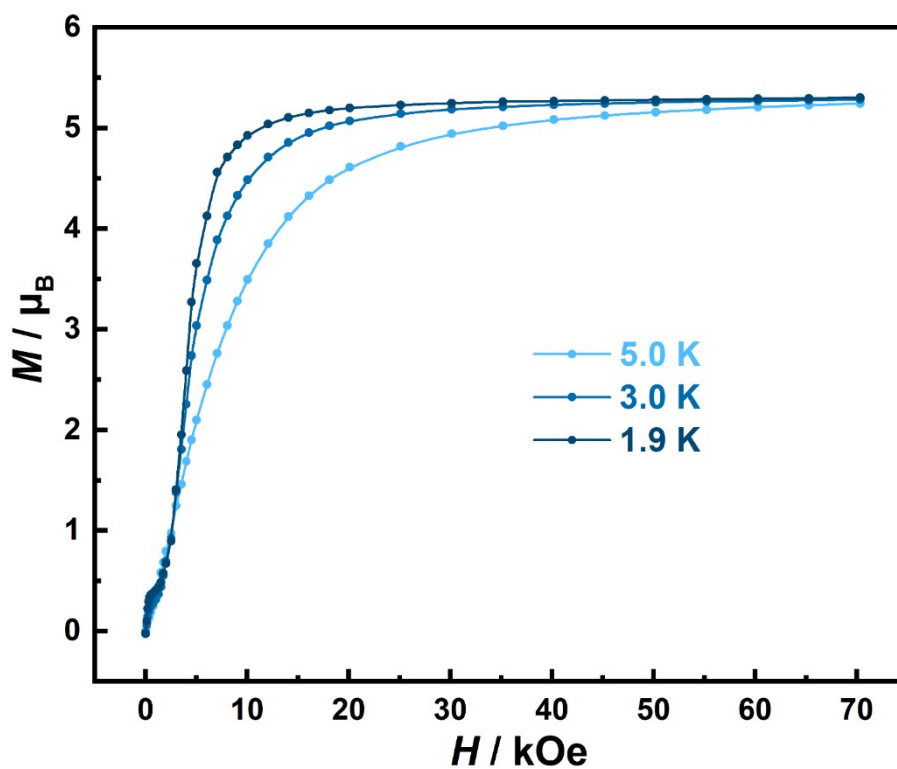

Figure S37. Field dependence of the magnetization at 1.9, 3 and 5 K for 3S.

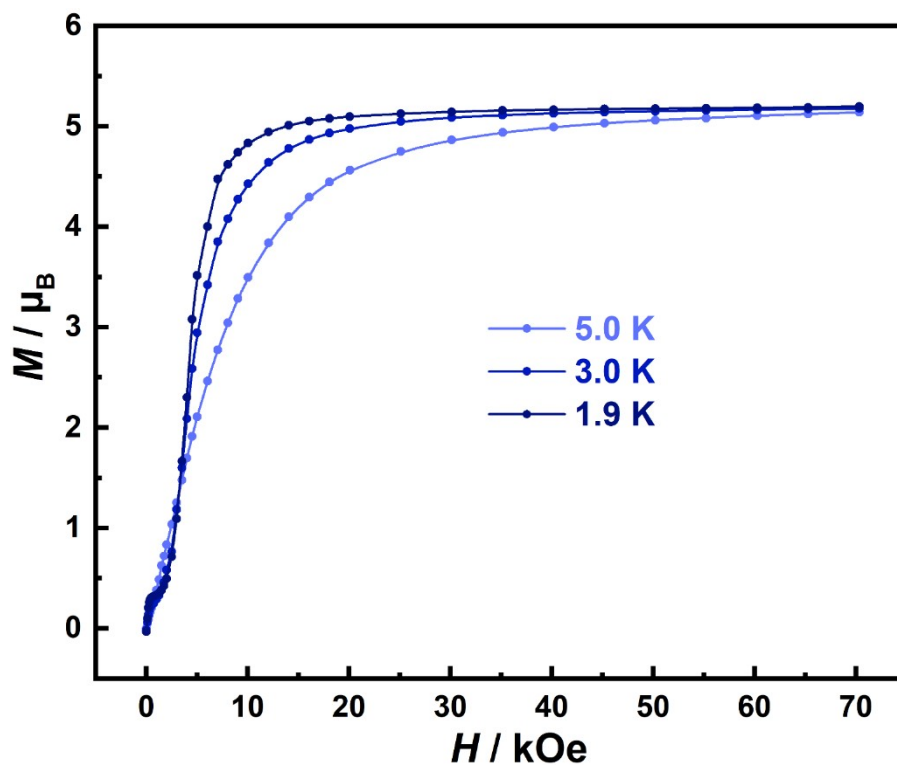

Figure S38. Field dependence of the magnetization at 1.9, 3 and 5 K for 4R.

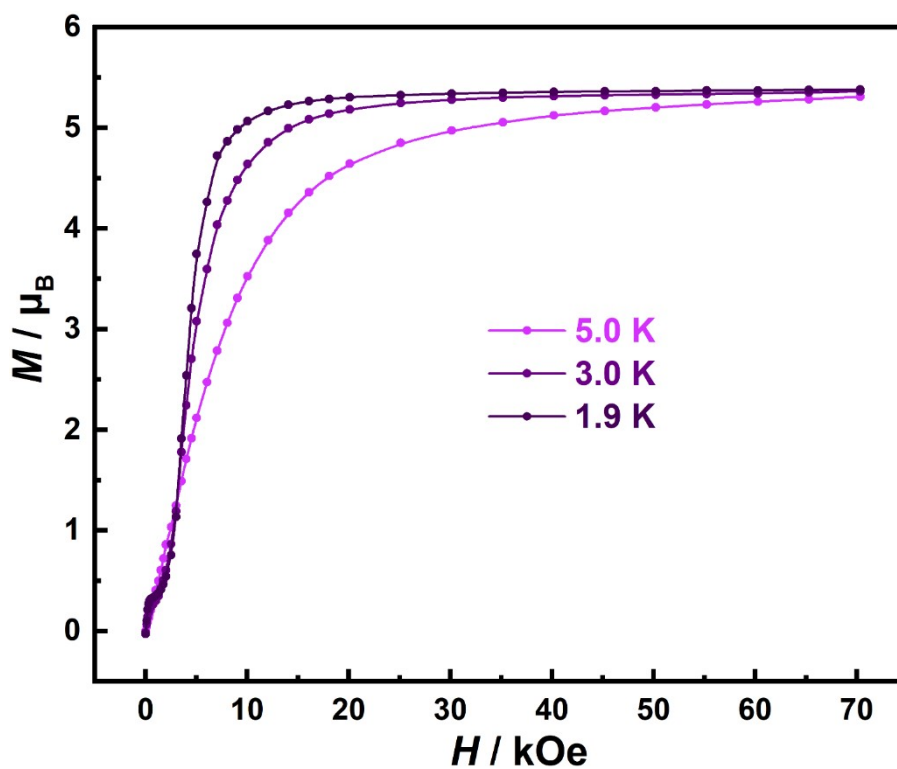

Figure S39. Field dependence of the magnetization at 1.9, 3 and 5 K for 4S.

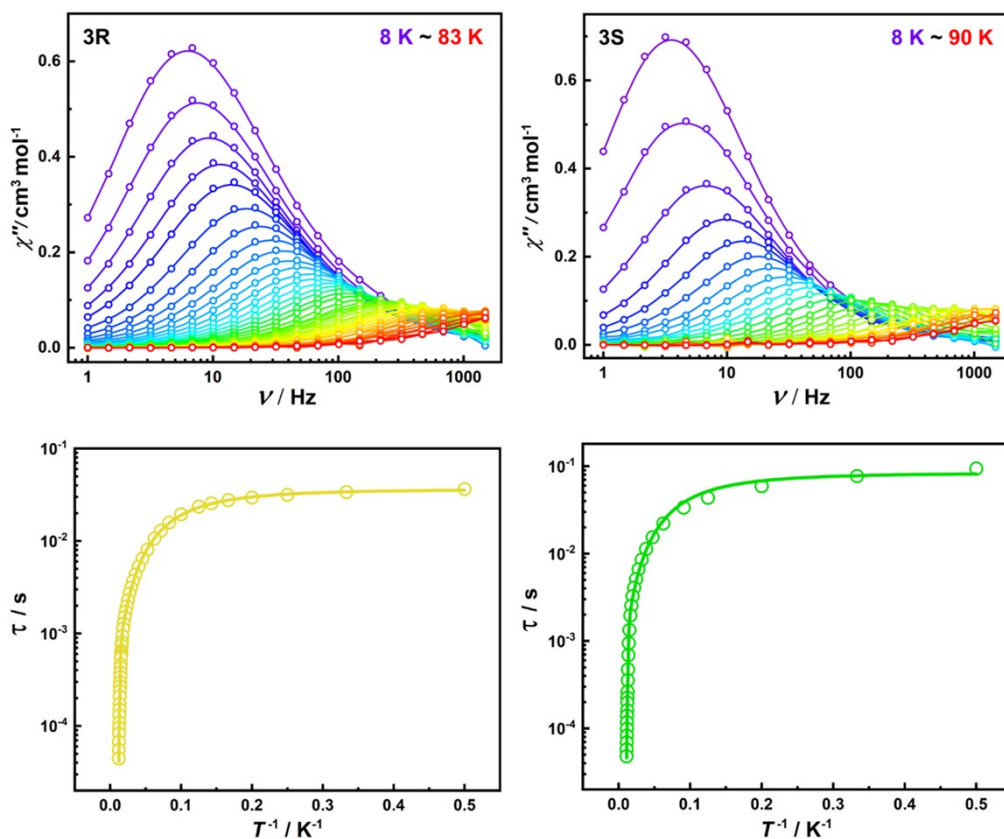

Figure S40. (upper) Frequency dependence of the out-of-phase component of the ac susceptibility for **3R** and **3S** at the temperatures shown. (bottom) Temperature dependence of the magnetic relaxation times plotted as  $\tau$  versus  $T^{-1}$ . Solid lines are fits using the parameters in Table 1. Data were collected in an ac field of 3 Oe and zero dc field.

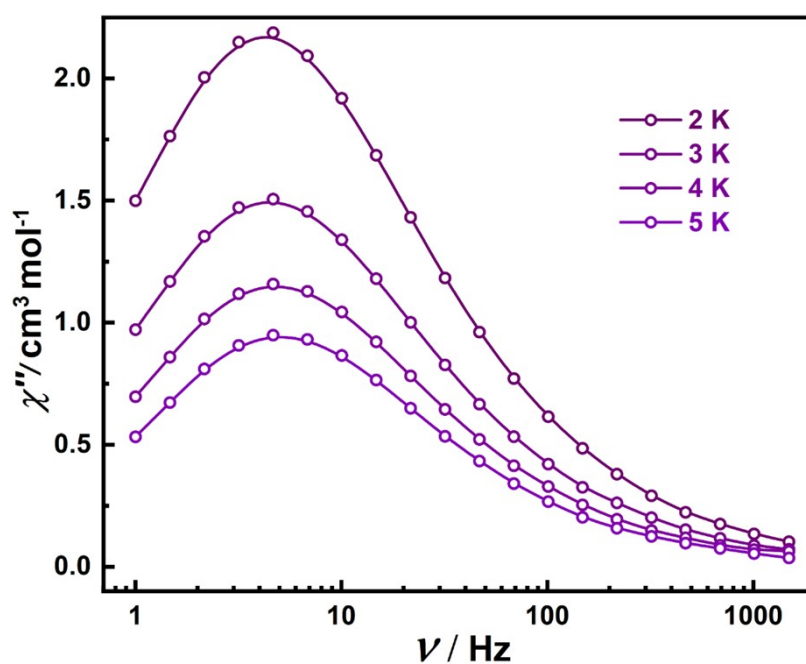

Figure S41. Frequency dependence of the out-of-phase susceptibility for **3R** in zero dc field at  $\nu = 1$ -1488 Hz and temperatures of 2-5 K.

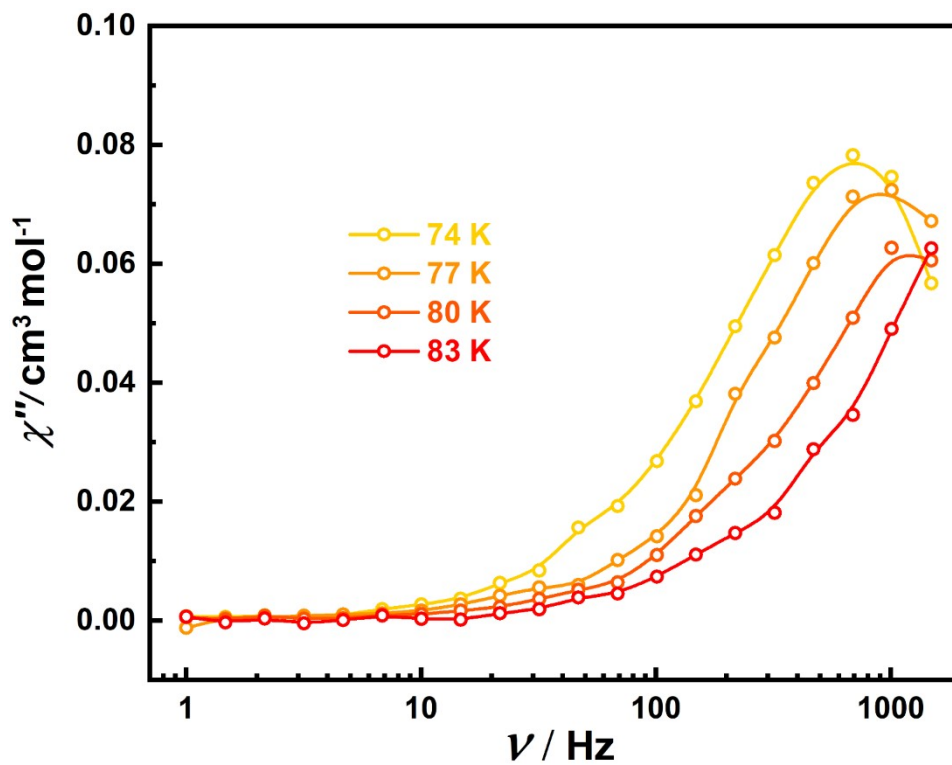

Figure S42. Frequency dependence of the out-of-phase susceptibility for **3R** in zero dc field at  $\nu = 1$ -1488 Hz and temperatures of 74-83 K.

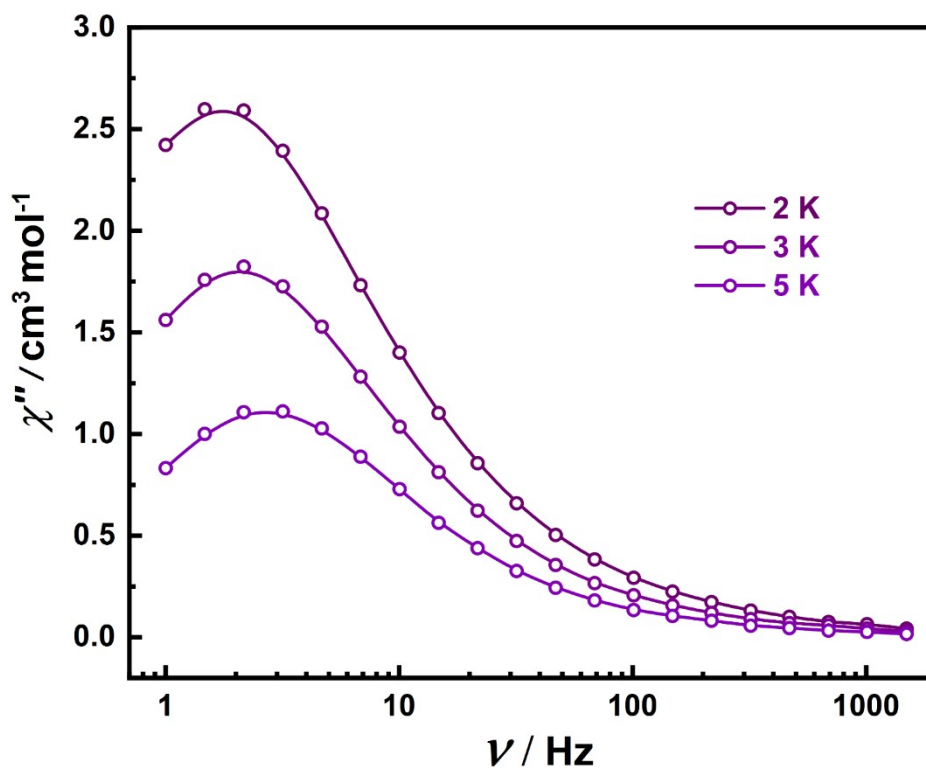

Figure S43. Frequency dependence of the out-of-phase susceptibility for **3S** in zero dc field at  $\nu = 1$ -1488 Hz and temperatures of 2-5 K.



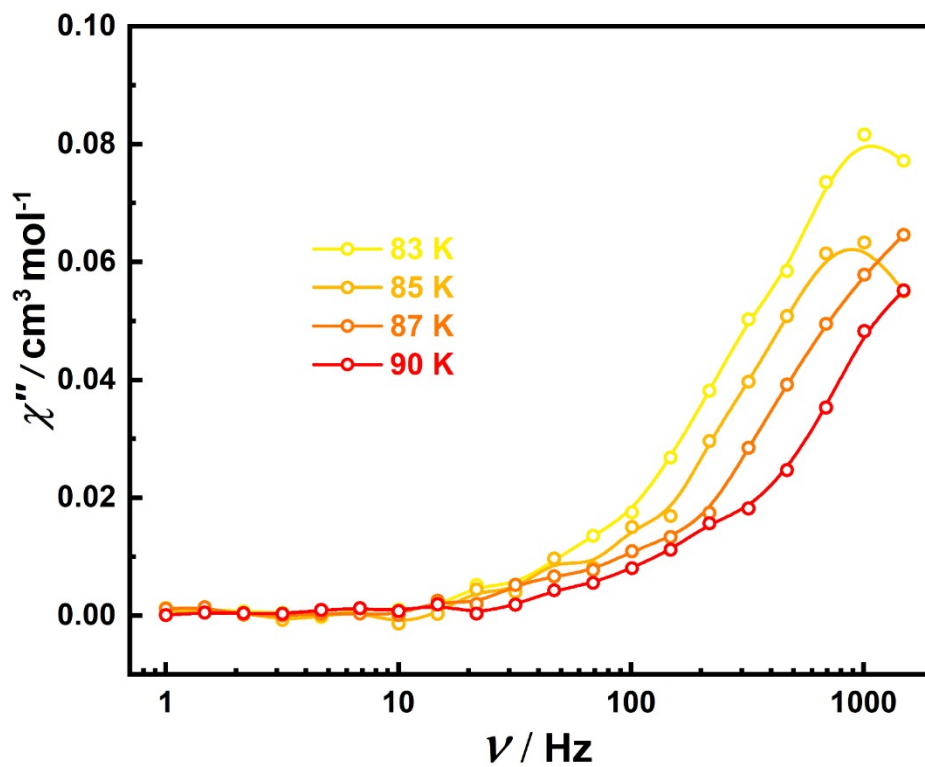

Figure S44. Frequency dependence of the out-of-phase susceptibility for **3S** in zero dc field at  $\nu = 1$ -1488 Hz and temperatures of 83-90 K.

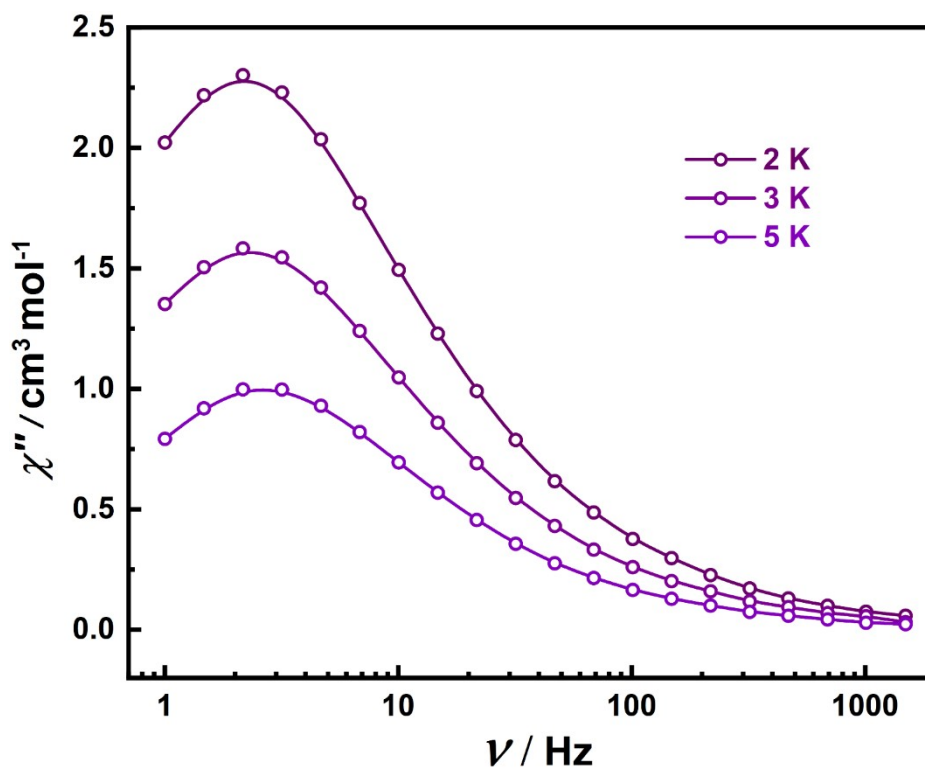

Figure S45. Frequency dependence of the out-of-phase susceptibility for **4R** in zero dc field at  $\nu = 1$ -1488 Hz and temperatures of 2-5 K.

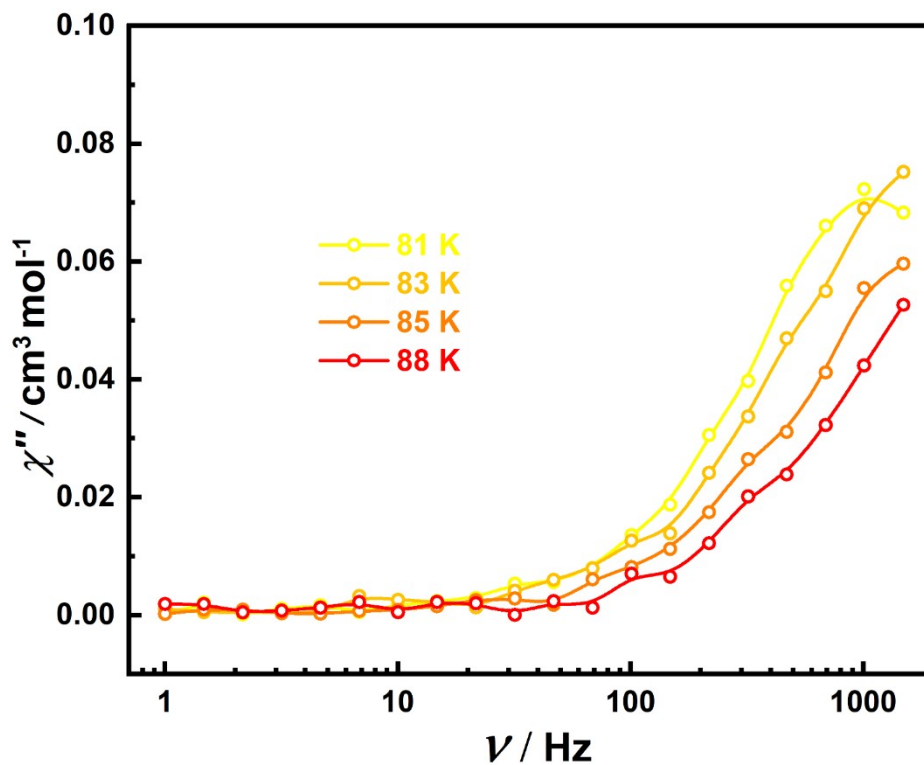

Figure S46. Frequency dependence of the out-of-phase susceptibility for **4R** in zero dc field at  $\nu = 1$ -1488 Hz and temperatures of 81-88 K.

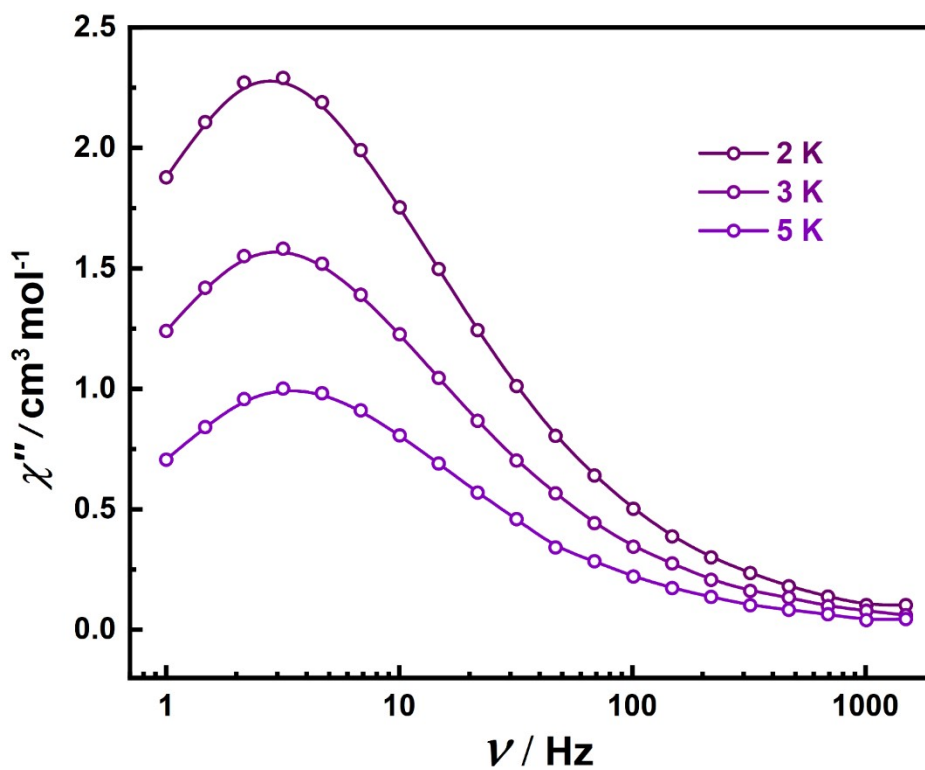

Figure S47. Frequency dependence of the out-of-phase susceptibility for **4S** in zero dc field at  $\nu = 1$ -1488 Hz and temperatures of 2-5 K.

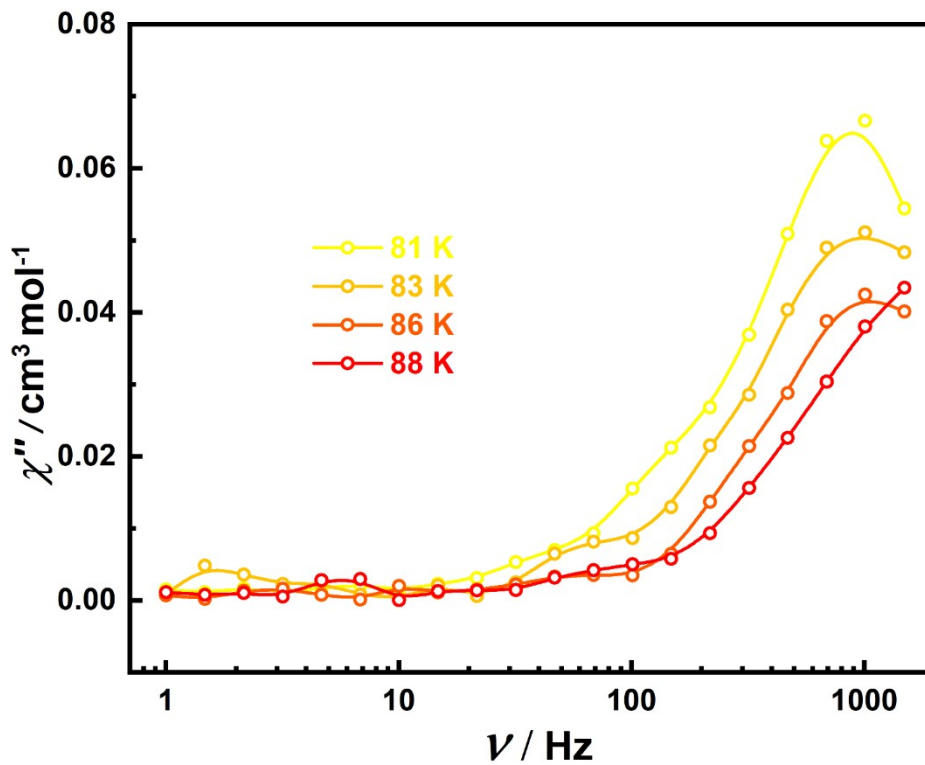

Figure S48. Frequency dependence of the out-of-phase susceptibility for **4S** in zero dc field at  $\nu = 1$ -1488 Hz and temperatures of 81-88 K.

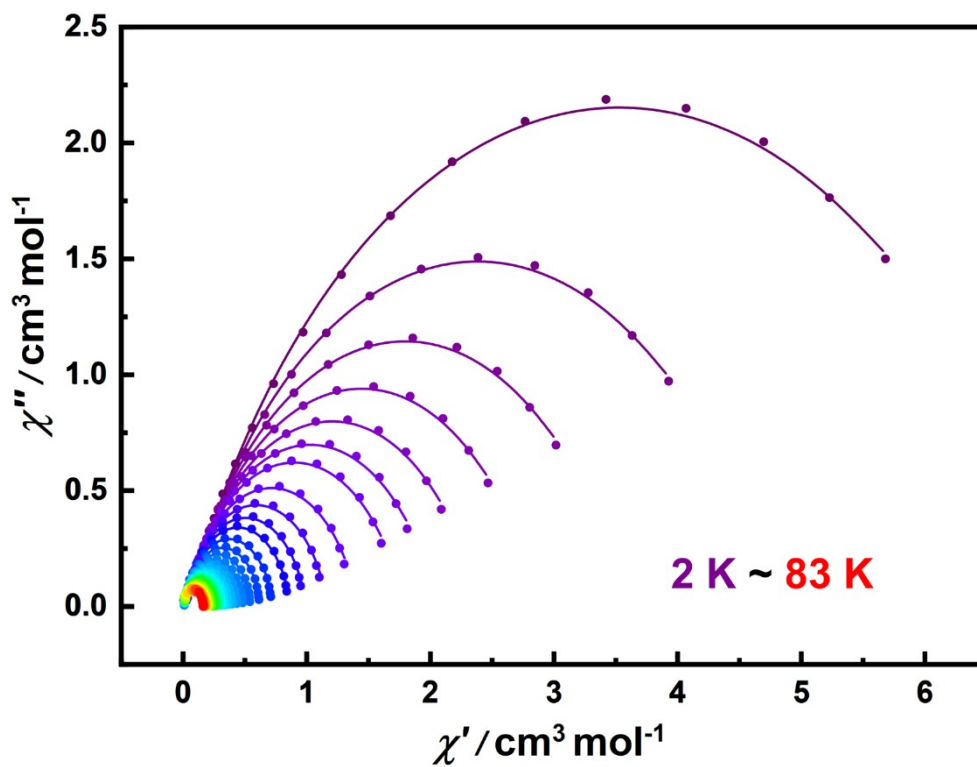

Figure S49. Cole-Cole plots for the AC susceptibilities in zero dc field for **3R** from 2-83 K. Solid lines represent fits to the data using a modified Debye model.

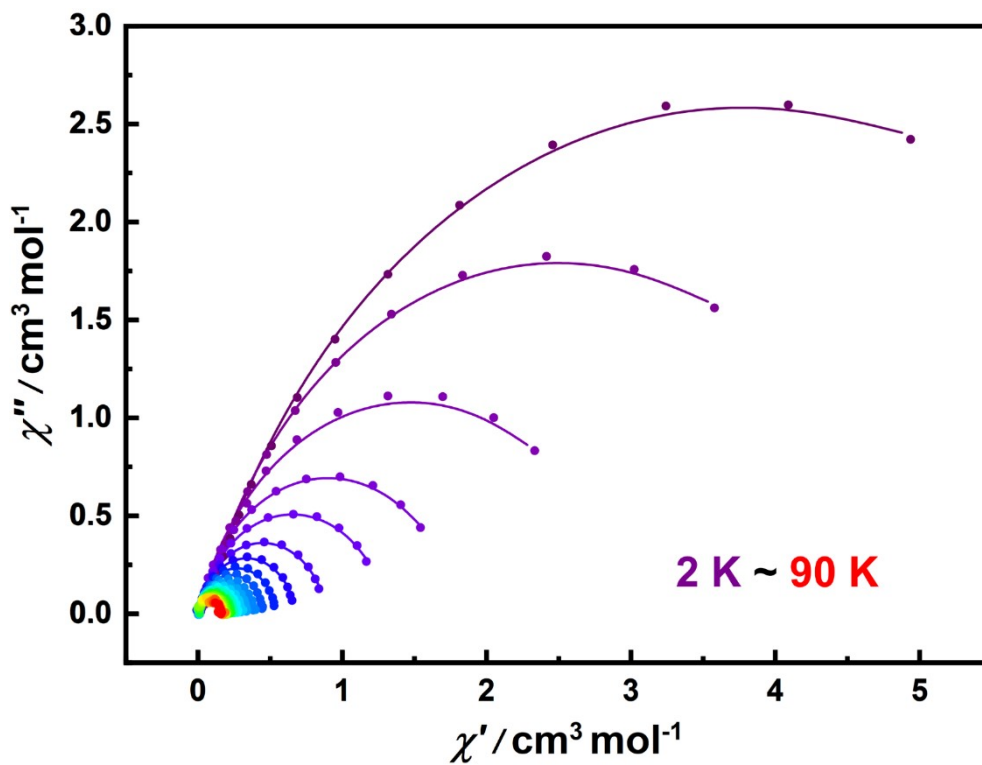

Figure S50. Cole-Cole plots for the AC susceptibilities in zero dc field for **3S** from 2-90 K. Solid lines represent fits to the data using a modified Debye model.

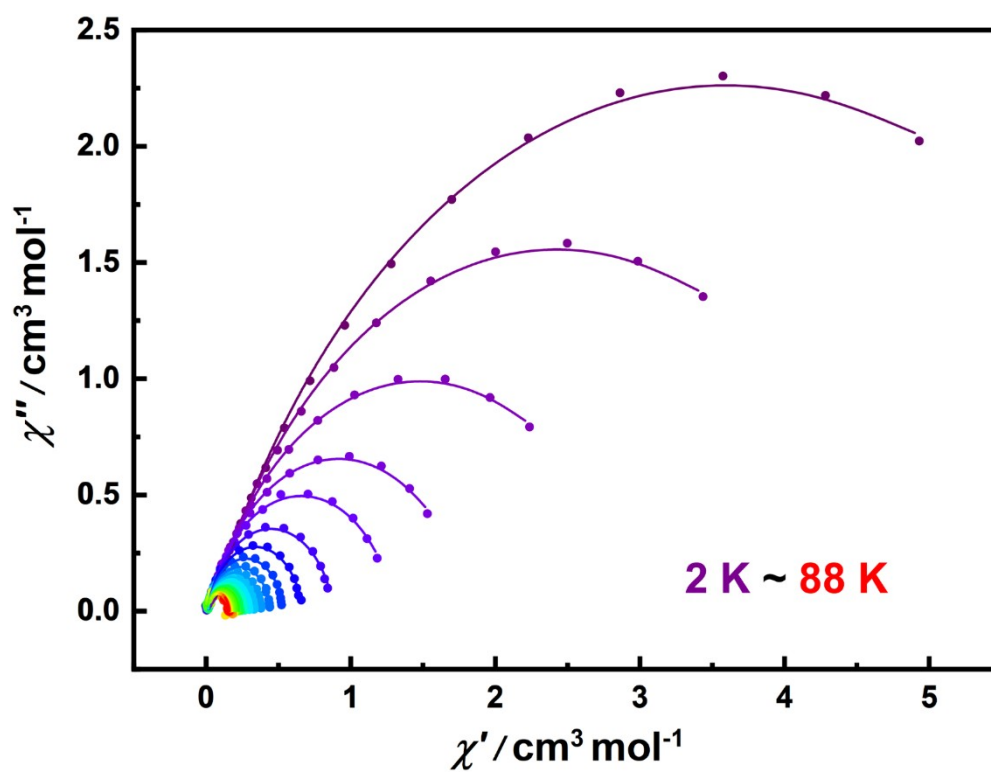

Figure S51. Cole-Cole plots for the AC susceptibilities in zero dc field for **4R** from 2-88 K. Solid lines represent fits to the data using a modified Debye model.

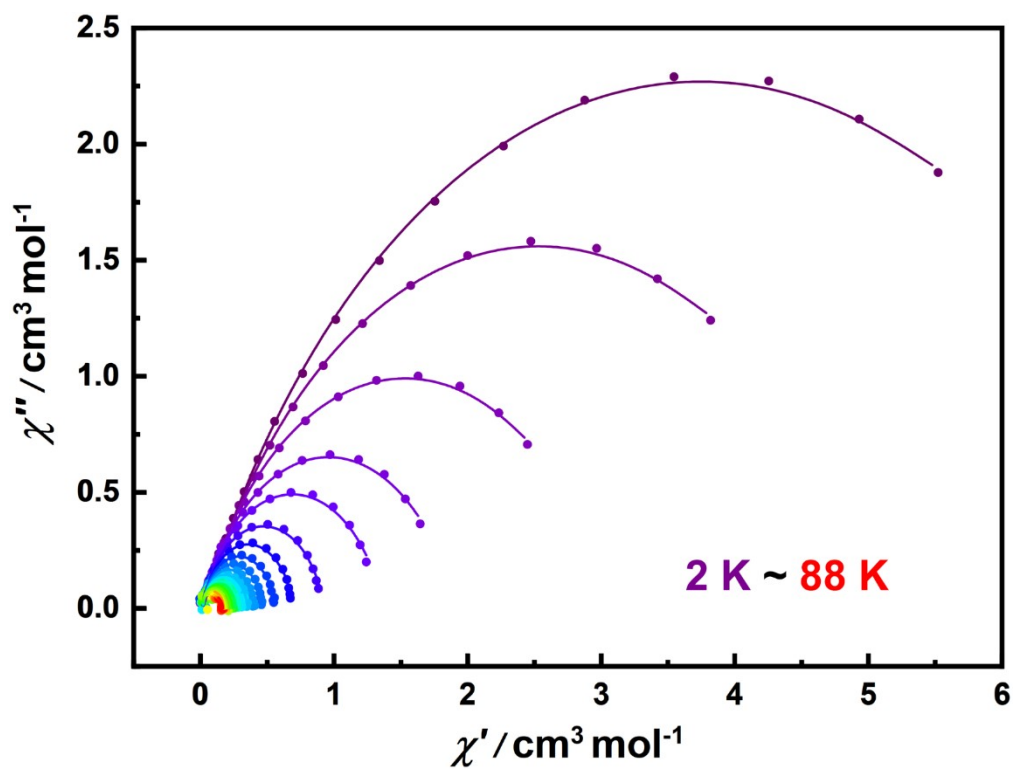

Figure S52. Cole-Cole plots for the AC susceptibilities in zero dc field for **4S** from 2-88 K. Solid lines represent fits to the data using a modified Debye model.

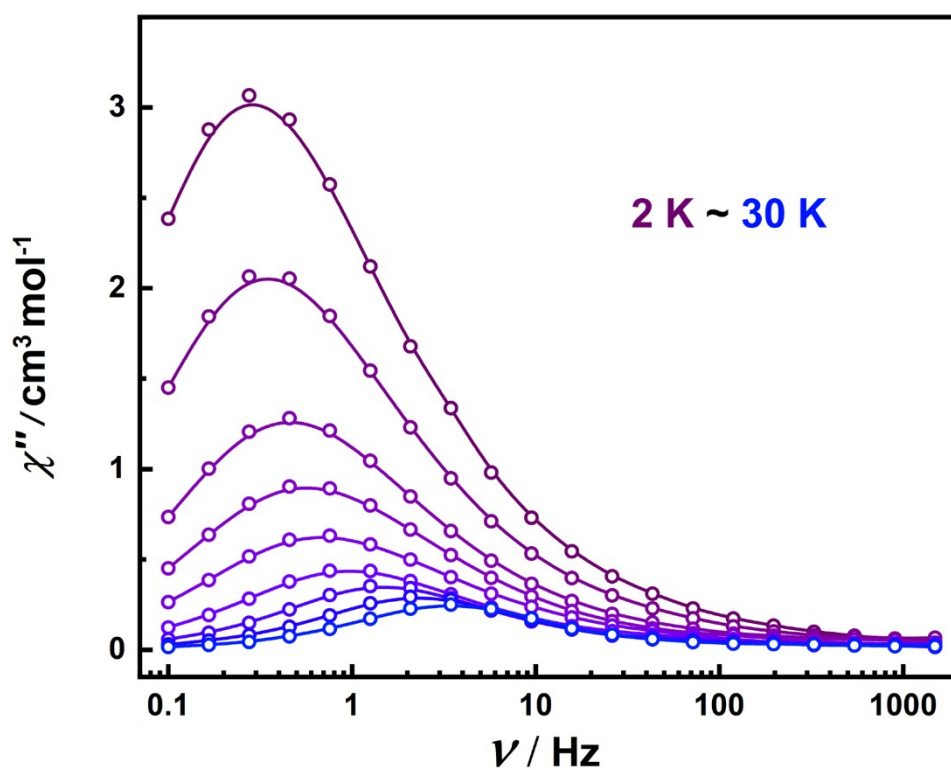

Figure S53. Frequency dependence of the out-of-phase susceptibility for **1** in zero dc field at  $\nu = 0.1$ -1488 Hz and temperatures of 2-30 K.

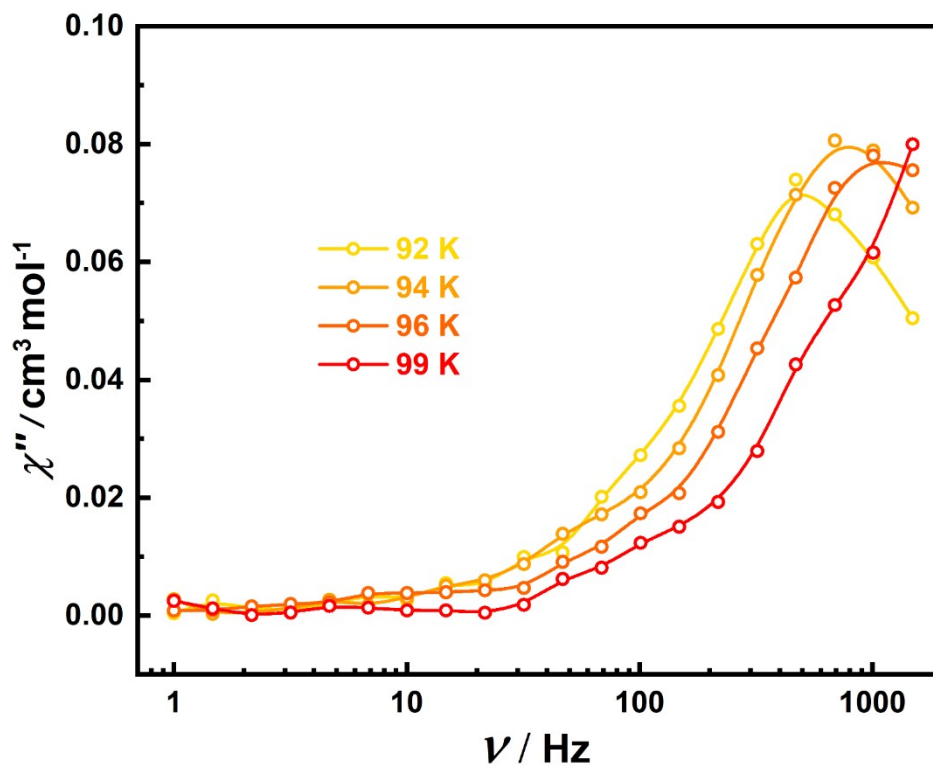

Figure S54. Frequency dependence of the out-of-phase susceptibility for **1** in zero dc field at  $\nu = 1$ -1488 Hz and temperatures of 92-99 K.

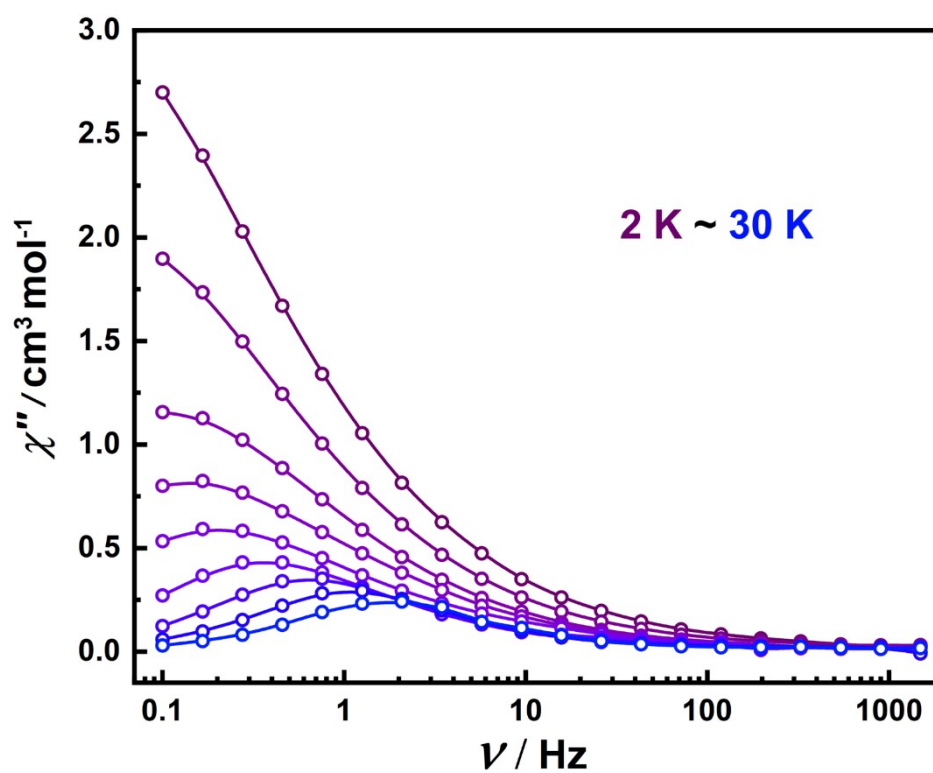

Figure S55. Frequency dependence of the out-of-phase susceptibility for **2** in zero dc field at  $\nu = 0.1$ -1488 Hz and temperatures of 2-30 K.

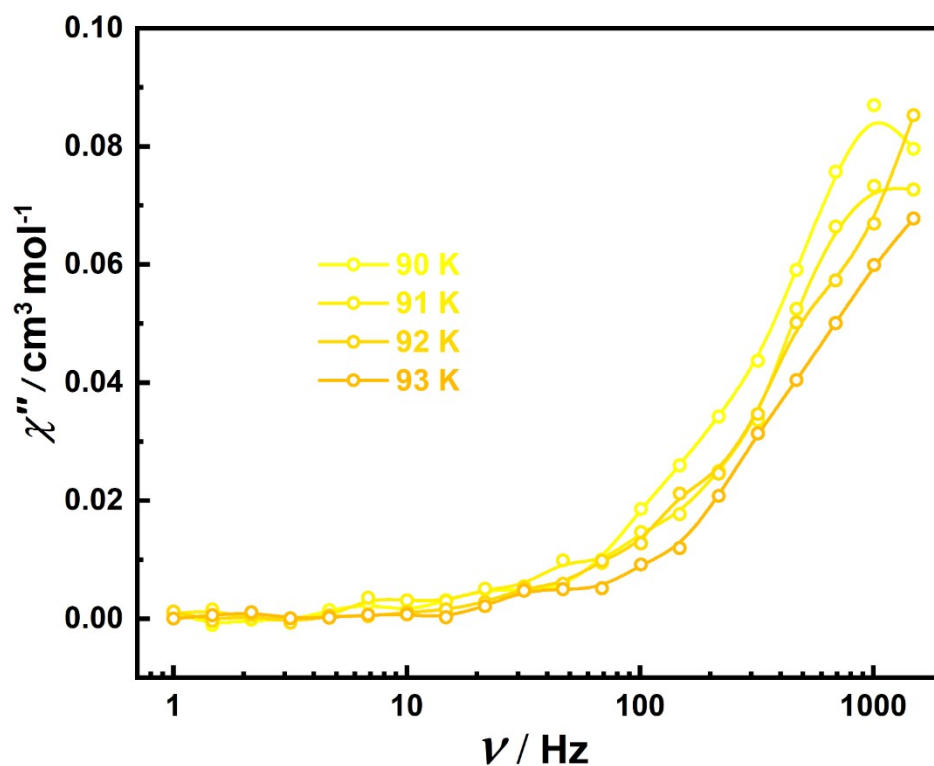

Figure S56. Frequency dependence of the out-of-phase susceptibility for **2** in zero dc field at  $\nu = 1$ -1488 Hz and temperatures of 90-93 K.

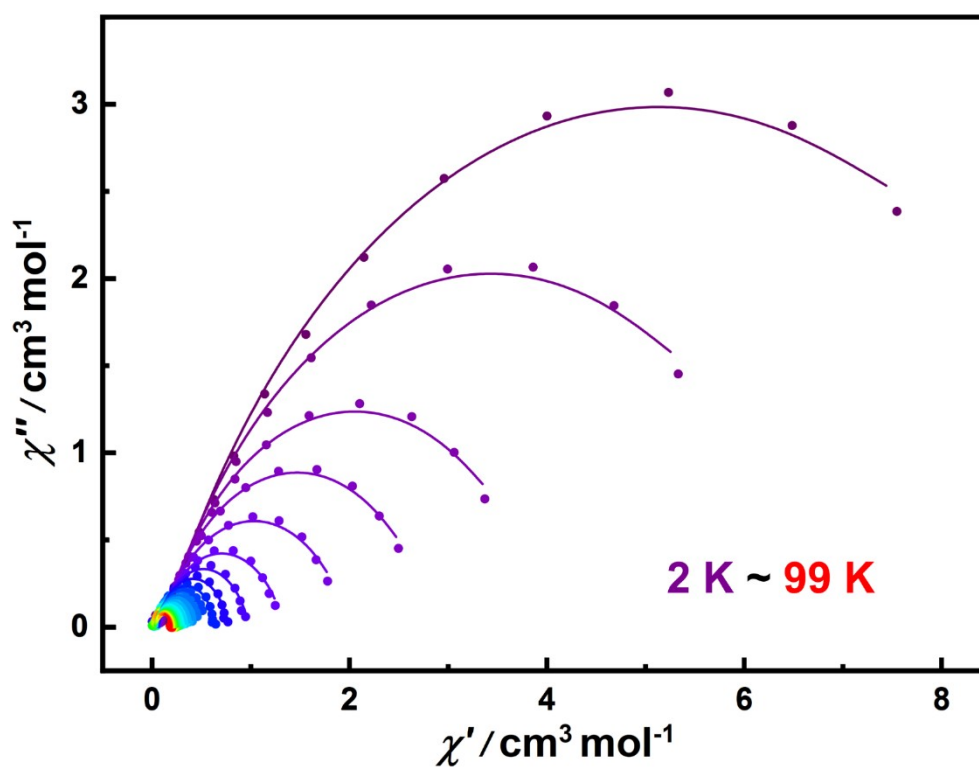

Figure S57. Cole-Cole plots for the AC susceptibilities in zero dc field for **1** from 2-99 K. Solid lines represent fits to the data using a modified Debye model.

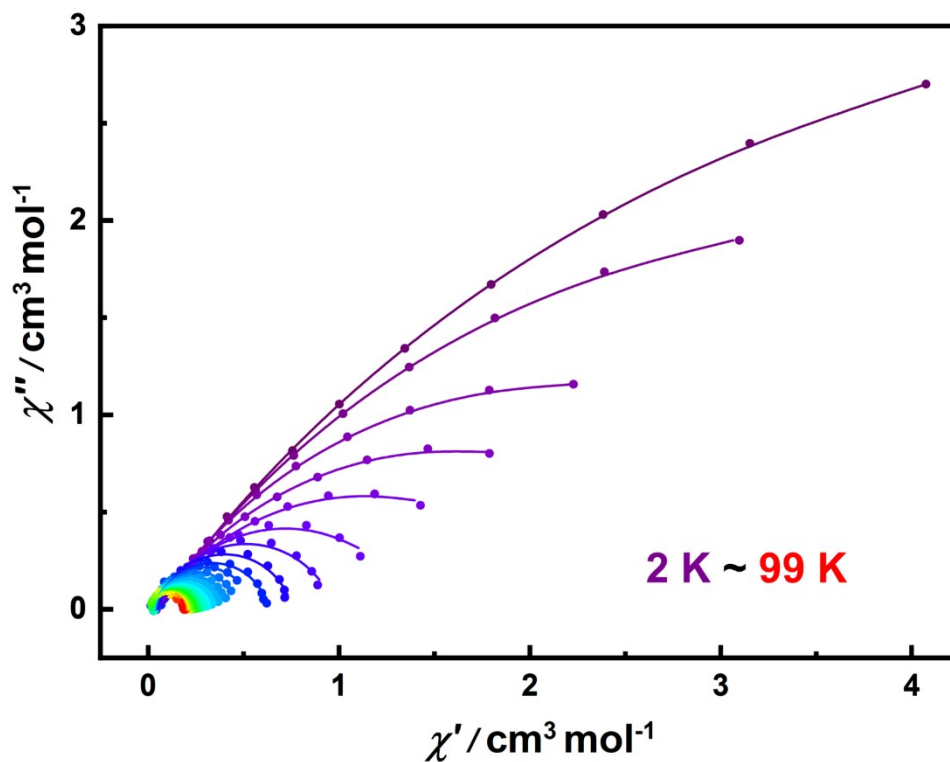

Figure S58. Cole-Cole plots for the AC susceptibilities in zero dc field for **2** from 2-99 K. Solid lines represent fits to the data using a modified Debye model.

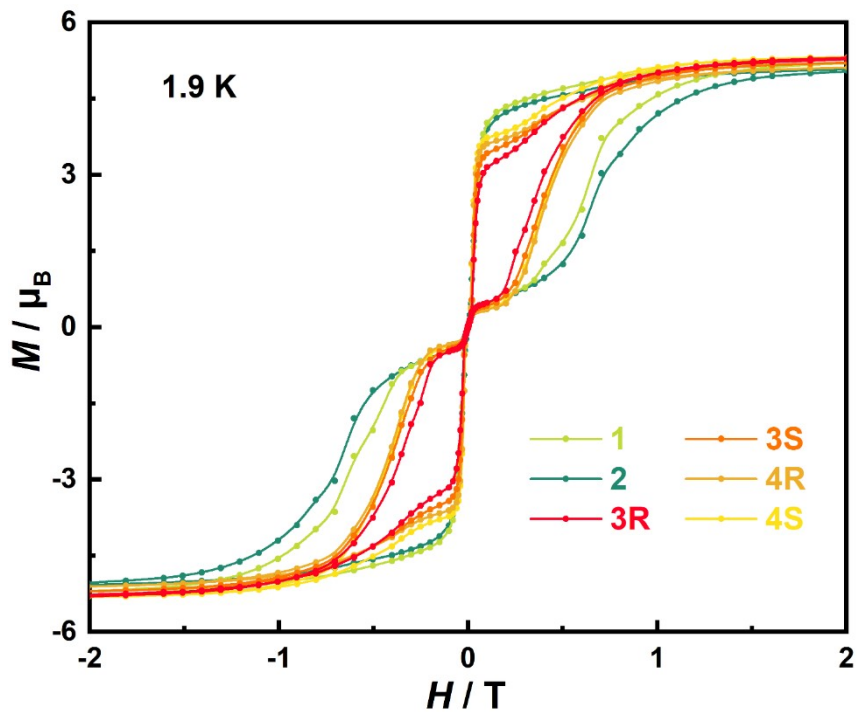

Figure S59. Magnetic hysteresis measurements of **1**, **2**, **3R**, **3S**, **4R** and **4S** at 1.9 K with an average sweep rate of 4 mT s<sup>-1</sup>.



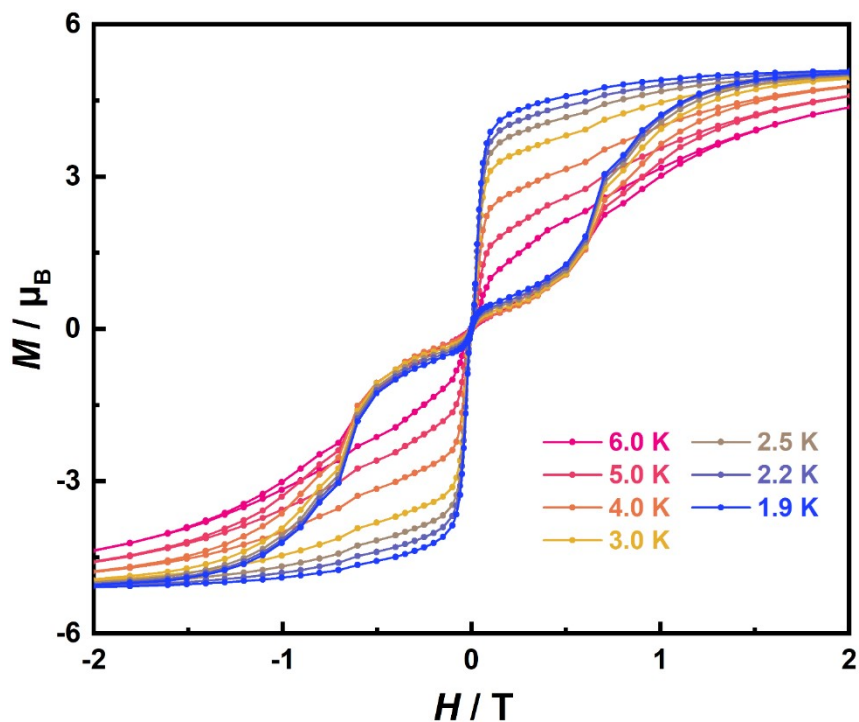

Figure. S60 Magnetic hysteresis measurements for **2** collected at 1.9-6.0 K with an average sweep rate of  $4 \text{ mT s}^{-1}$ .

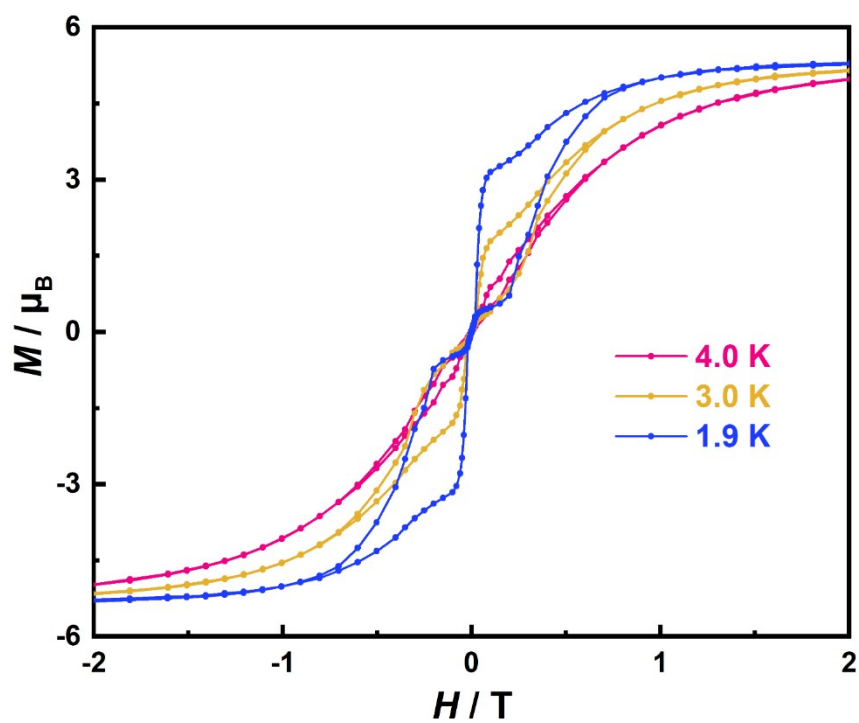

Figure S61. Magnetic hysteresis measurements of **3R** collected at 1.9-4.0 K with an average sweep rate of  $4 \text{ mT s}^{-1}$ .

## V. Computational details

Electronic structure calculations were performed using the ORCA 5.0.3 package.<sup>10</sup> The Cartesian coordinates for the input file were taken from the X-Ray structure (excluding the counter ions and solvent molecules). Dysprosium was described by the SARC2-QZVP basis set<sup>11</sup> and other elements were described by Def2-TZVP basis.<sup>12</sup> Scalar relativistic effects were included by the DKH2 Hamiltonian.<sup>13-15</sup> CASSCF(9,7)<sup>16</sup> calculations include the seven 4f orbitals of the Dy<sup>III</sup> ion in the active space, with 21, 224, and 490 sextet, quartet, and doublet roots, respectively. For lanthanides SMM calculations is necessary to represent the spin-orbit coupling operator in a basis of multideterminant wave functions. Thus, after convergence of CASSCF energies, spin-orbit coupling (SOC) effects were included in a subsequent quasi-degenerate perturbation theory (QDPT) step. Tunnelling relaxation times were calculated according to a model based on intermolecular spin dipolar interactions.<sup>17</sup> Input data for this methodology are the crystallographic information file (CIF) and CASSCF(9,7)/QDPT energies and g-tensors for the eight Kramers' doublets associated with ground Dy<sup>III</sup> multiplet. This user-friendly routine can be obtained free of charge upon request to the author.

Table S25. CASSCF calculated electronic states for **1** and **2**.

| KDs | <b>1</b>           |                                   | <b>2</b>           |                                   |
|-----|--------------------|-----------------------------------|--------------------|-----------------------------------|
|     | E/cm <sup>-1</sup> | g-tensors                         | E/cm <sup>-1</sup> | g-tensors                         |
| 1   | 0                  | 0.000102<br>0.000112<br>19.489022 | 0                  | 0.000103<br>0.000110<br>19.489438 |
| 2   | 537.72             | 0.050364<br>0.050860<br>16.684097 | 542.16             | 0.051186<br>0.051735<br>16.681850 |
| 3   | 949.86             | 0.014953<br>0.052618<br>13.831254 | 957.68             | 0.027697<br>0.045236<br>13.819505 |
| 4   | 1192.57            | 0.625511<br>0.958586<br>9.218578  | 1201.45            | 0.660707<br>1.135751<br>8.995357  |
| 5   | 1267.07            | 0.651953<br>3.771521<br>12.666283 | 1274.94            | 0.625469<br>2.827451<br>12.617979 |
| 6   | 1277.93            | 1.004379<br>3.690449<br>10.663599 | 1285.84            | 1.236696<br>4.800832<br>10.007486 |
| 7   | 1319.07            | 0.744137<br>1.841056<br>5.111886  | 1324.95            | 0.881880<br>1.595879<br>5.416910  |
| 8   | 1376.58            | 0.774722<br>8.412806<br>10.806926 | 1383.92            | 0.792336<br>7.863529<br>11.258874 |

Table S26. CASSCF calculated electronic states for **3S** and **3R**.

| KDs | <b>3S</b>          |                                   | <b>3R</b>          |                                   |
|-----|--------------------|-----------------------------------|--------------------|-----------------------------------|
|     | E/cm <sup>-1</sup> | <i>g</i> -tensors                 | E/cm <sup>-1</sup> | <i>g</i> -tensors                 |
| 1   | 0                  | 0.000464<br>0.000489<br>19.484369 | 0                  | 0.000388<br>0.000414<br>19.485246 |
| 2   | 512.61             | 0.069717<br>0.073767<br>16.678489 | 514.45             | 0.065934<br>0.069288<br>16.680730 |
| 3   | 896.35             | 0.016608<br>0.160763<br>13.679481 | 901.33             | 0.037220<br>0.116477<br>13.711378 |
| 4   | 1099.06            | 2.712399<br>5.339346<br>7.414779  | 1110.33            | 2.741347<br>5.003177<br>6.711784  |
| 5   | 1144.06            | 2.260863<br>5.199314<br>10.268710 | 1155.05            | 1.741232<br>5.597080<br>11.243914 |
| 6   | 1179.11            | 0.628987<br>3.575400<br>9.804774  | 1188.20            | 0.834310<br>3.214612<br>9.715628  |
| 7   | 1218.19            | 0.013138<br>0.627633<br>12.450421 | 1228.18            | 0.254759<br>0.572770<br>12.119114 |
| 8   | 1285.22            | 1.282220<br>4.349747<br>14.413910 | 1292.21            | 1.292509<br>4.986754<br>13.830846 |

Table S27. CASSCF calculated electronic states for 4S and 4R.

| KDs | 4S                 |                                   | 4R                 |                                   |
|-----|--------------------|-----------------------------------|--------------------|-----------------------------------|
|     | E/cm <sup>-1</sup> | <i>g</i> -tensors                 | E/cm <sup>-1</sup> | <i>g</i> -tensors                 |
| 1   | 0                  | 0.000445<br>0.000474<br>19.484833 | 0                  | 0.000432<br>0.000462<br>19.484533 |
| 2   | 508.34             | 0.068325<br>0.072361<br>16.681829 | 508.36             | 0.069857<br>0.073793<br>16.680953 |
| 3   | 889.88             | 0.037327<br>0.130218<br>13.692556 | 889.44             | 0.049876<br>0.119514<br>13.687534 |
| 4   | 1093.06            | 3.098708<br>5.289418<br>6.460718  | 1092.59            | 3.012777<br>4.926132<br>6.339888  |
| 5   | 1134.47            | 1.746710<br>5.566728<br>11.271112 | 1134.19            | 1.697208<br>5.678658<br>11.274236 |
| 6   | 1173.20            | 0.885268<br>2.669129<br>9.707984  | 1170.65            | 0.759181<br>2.490877<br>9.939726  |
| 7   | 1214.27            | 0.176498<br>0.754191<br>13.374452 | 1212.42            | 0.300440<br>0.655248<br>12.872376 |
| 8   | 1276.81            | 1.286675<br>4.691610<br>14.029073 | 1275.84            | 1.300516<br>4.721200<br>14.012573 |

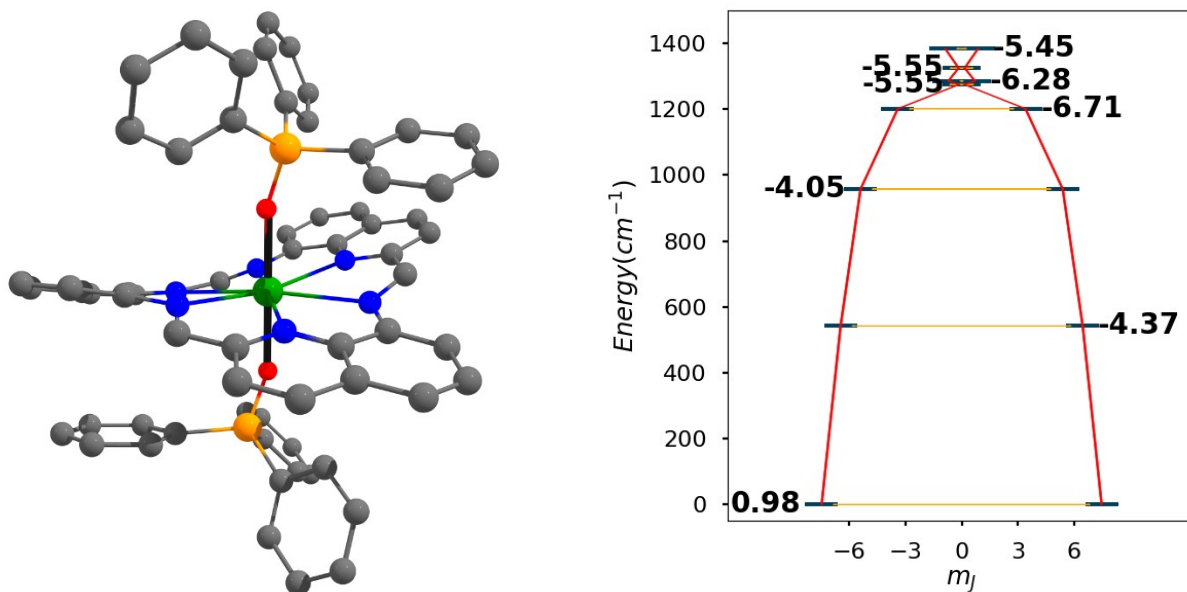

Figure S62. (Left) Calculated orientation of the main magnetic axis of the ground Kramers doublet and (Right) Ab initio double well potential for **2**. The blue bars indicate the Kramers doublets. Tunnelling relaxation times ( $\tau_{\text{QTM}}$ ) between the connecting pairs are indicated as orange lines and the values are represented on a logarithmic scale.

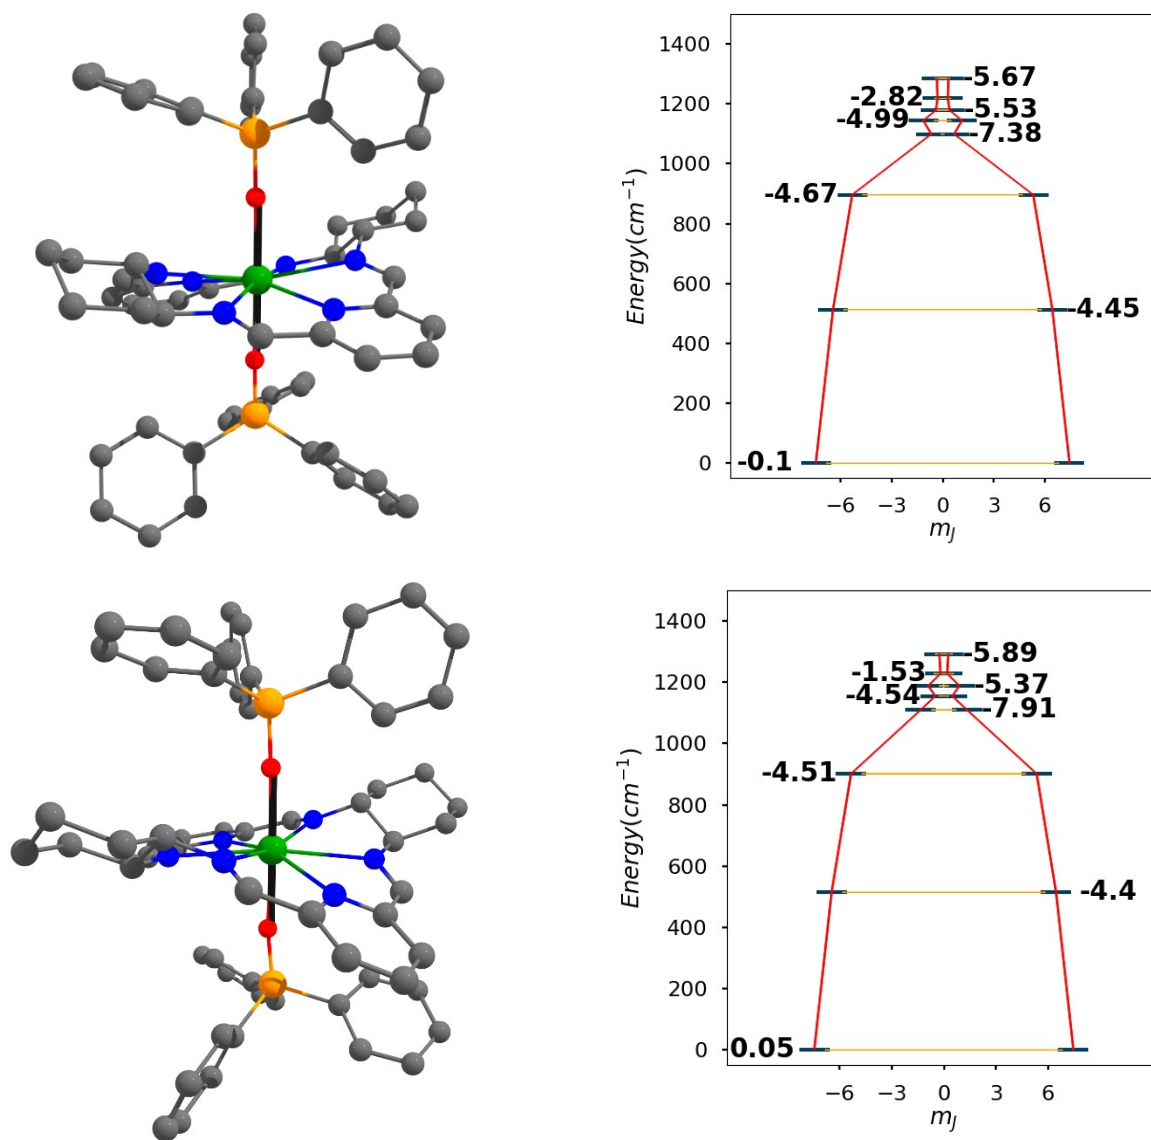

Figure S63. Calculated orientation of the main magnetic axis of the ground Kramers doublet and (Right) Ab initio double well potential for **3S** (up) and **3R** (bottom). The blue bars indicate the Kramers doublets. Tunneling relaxation times ( $\tau_{\text{QTM}}$ ) between the connecting pairs are indicated as orange lines and the values are represented on a logarithmic scale.

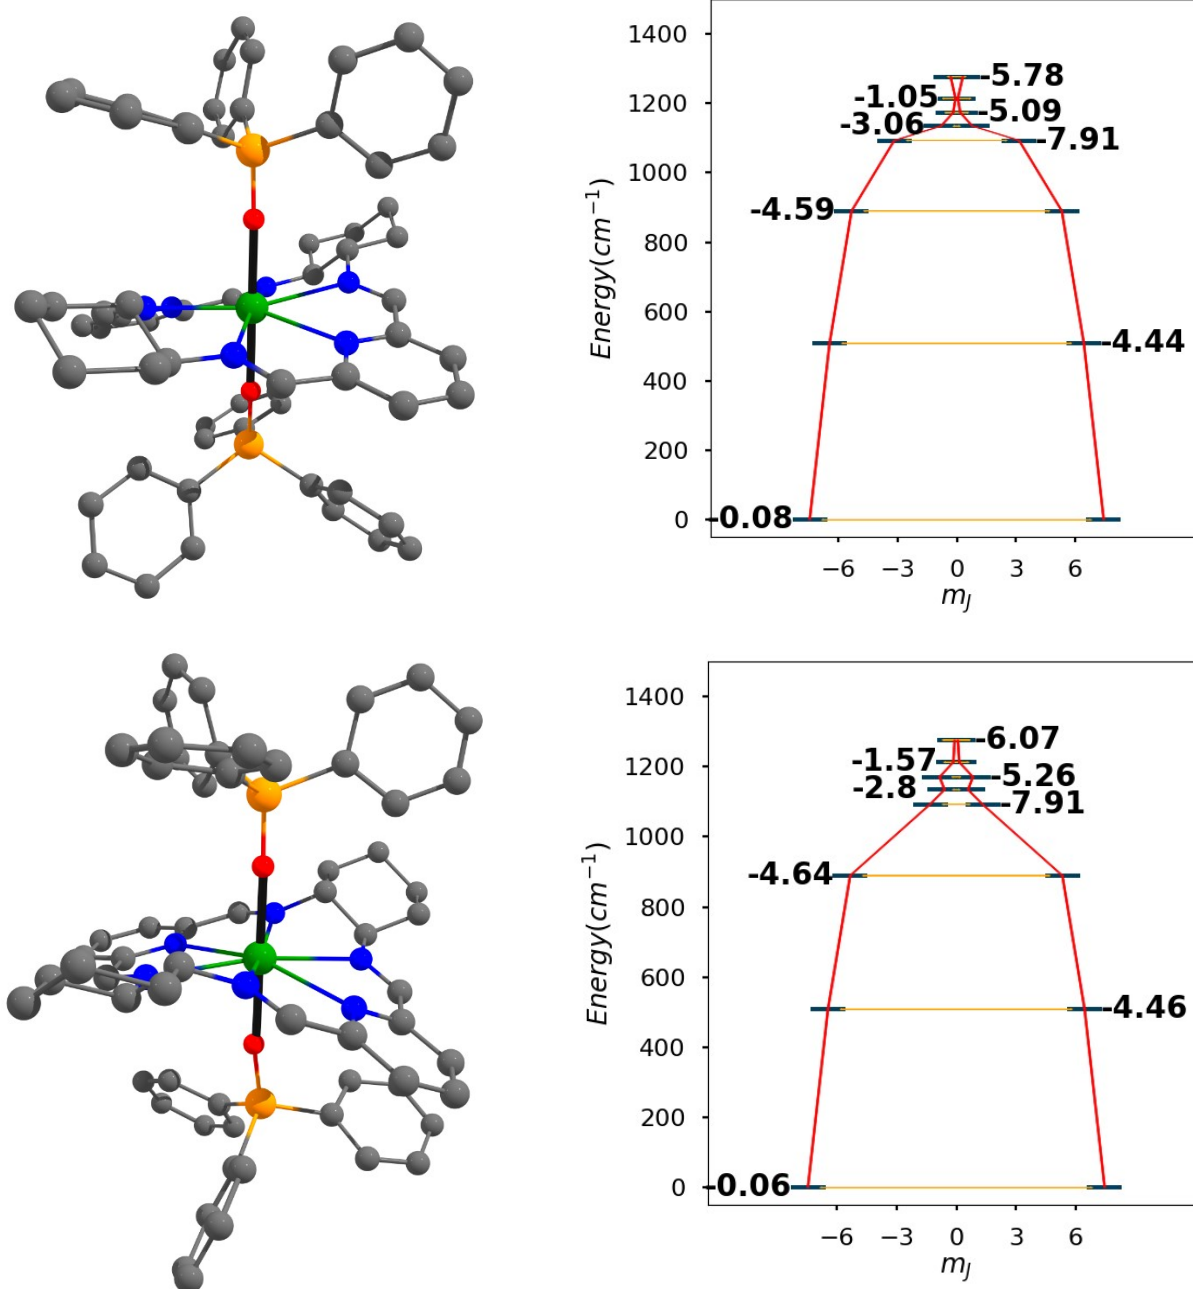

Figure S64. (Left) Calculated orientation of the main magnetic axis of the ground Kramers doublet and (Right) Ab initio double well potential for **4S** (up) and **4R** (bottom). The blue bars indicate the Kramers doublets. Tunnelling relaxation times ( $\tau_{\text{QTM}}$ ) between the connecting pairs are indicated as orange lines and the values are represented on a logarithmic scale.

## VI. References

1. G. M. Sheldrick, *Acta Cryst. A*, 2015, **71**, 3-8.
2. G. M. Sheldrick, *Acta Cryst. A*, 2008, **64**, 112-122.
3. O. V. Dolomanov, L. J. Bourhis, R. J. Gildea, J. A. K. Howard and H. Puschmann, *J. Appl. Crystallogr.*, 2009, **42**, 339-341.
4. G. A. Bain and J. F. Berry, *J. Chem. Educ.*, 2008, **85**, 532.
5. G. Xue, J. S. Bradshaw, N. K. Dalley, P. B. Savage, K. E. Krakowiak, R. M. Izatt, L. Prodi, M. Montalti and N. Zaccheroni, *Tetrahedron*, 2001, **57**, 7623-7628.
6. J. L. Greenfield, F. J. Rizzuto, I. Goldberga and J. R. Nitschke, *Angew. Chem. Int. Ed.*, 2017, **56**, 7541-7545.
7. A. Music, A. N. Baumann, P. Spieß, A. Plantefol, T. C. Jagau and D. Didier, *J. Am. Chem. Soc.*, 2020, **142**, 4341-4348.
8. M. Pinsky and D. Avnir, *Inorg. Chem.*, 1998, **37**, 5575-5582.
9. D. Casanova, J. Cirera, M. Llunell, P. Alemany, D. Avnir and S. Alvarez, *J. Am. Chem. Soc.*, 2004, **126**, 1755-1763.
10. F. Neese, *WIREs Comput Mol Sci.*, 2022, **12**, e1606.
11. D. Aravena, F. Neese and D. A. Pantazis, *J. Chem. Theory Comput.*, 2016, **12**, 1148-1156.
12. F. Weigend and R. Ahlrichs, *Phys. Chem. Chem. Phys.*, 2005, **7**, 3297-3305.
13. N. Rösch, S. Krüger, M. Mayer and V. A. Nasluzov, in *Theoretical and Computational Chemistry*, ed. J. M. Seminario, Elsevier, 1996, vol. 4, pp. 497-566.
14. T. Nakajima and K. Hirao, *Chem. Rev.*, 2012, **112**, 385-402.
15. M. Reiher, *WIREs Comput Mol Sci.*, 2012, **2**, 139-149.
16. P.-Å. Malmqvist and B. O. Roos, *Chem. Phys. Lett.*, 1989, **155**, 189-194.
17. D. Aravena, *J. Phys. Chem. Lett.*, 2018, **9**, 5327-5333.
